# Supplementary material
Source: PubMed Central journal article supplement (PMC4432183)
Supplement: AAC.00260-15_zac006153969so1.pdf [file AAC.00260-15_zac006153969so1.pdf]

## **ONLINE DATA SUPPLEMENT**

**Tables S1 to S7**

**Figures S1 to S2**

**Table S1. Raw CFU count data from mouse lungs.**

| Time point           | Treatment group                     | Mouse | Agar plates        | Final (4-week) CFU counts for the following 10-fold dilutions:<br>(highlighted cell used to calculate CFU/lung) |         |          |         |          |         | CFU/lung   | Log <sub>10</sub><br>CFU/lung |      |
|----------------------|-------------------------------------|-------|--------------------|-----------------------------------------------------------------------------------------------------------------|---------|----------|---------|----------|---------|------------|-------------------------------|------|
|                      |                                     |       |                    | 0                                                                                                               | 1       | 2        | 3       | 4        | 5       |            |                               |      |
| Day -41<br>(Week -6) | Pre-treatment<br>(run 1)            | 1     | Plain <sup>1</sup> | 11                                                                                                              | 2       |          |         |          |         | 55         | 1.75                          |      |
|                      |                                     |       | Charcoal           | Contam.                                                                                                         | 1       |          |         |          |         |            |                               |      |
|                      |                                     | 2     |                    | Plain <sup>1</sup>                                                                                              | 17      | 2        |         |          |         |            | 85                            | 1.93 |
|                      |                                     |       |                    | Charcoal                                                                                                        | Contam. | Contam.  |         |          |         |            |                               |      |
|                      | Pre-treatment<br>(run 2)            | 3     |                    | Plain <sup>1</sup>                                                                                              | 30      | 6        |         |          |         |            | 175                           | 2.25 |
|                      |                                     |       |                    | Charcoal                                                                                                        | 35      | 3        |         |          |         |            |                               |      |
|                      |                                     | 4     |                    | Plain <sup>1</sup>                                                                                              | 34      | 4        |         |          |         |            | 225                           | 2.35 |
|                      |                                     |       |                    | Charcoal                                                                                                        | 45      | 7        |         |          |         |            |                               |      |
|                      | Pre-treatment<br>(run 3)            | 5     |                    | Plain <sup>1</sup>                                                                                              | 37      | 3        |         |          |         |            | 330                           | 2.52 |
|                      |                                     |       |                    | Charcoal                                                                                                        | 66      | 5        |         |          |         |            |                               |      |
|                      |                                     | 6     |                    | Plain <sup>2</sup>                                                                                              | 31      | 0        |         |          |         |            | 165                           | 2.22 |
|                      |                                     |       |                    | Charcoal                                                                                                        | 33      | 3        |         |          |         |            |                               |      |
| Day 0                | Pre-treatment<br>(run 1)            | 1     | Plain              | +++                                                                                                             | ++      | +        | ~1000   | 113      | 11      | 5,500,000  | 6.74                          |      |
|                      |                                     |       | Charcoal           | +++                                                                                                             | ++      | +        | ~1000   | 94       | 3       |            |                               |      |
|                      |                                     | 2     |                    | Plain                                                                                                           | +++     | ++       | +       | ~600     | 57      | 9          | 3,100,000                     | 6.49 |
|                      |                                     |       |                    | Charcoal                                                                                                        | +++     | ++       | +       | ~600     | 62      | 7          |                               |      |
|                      |                                     | 3     |                    | Plain                                                                                                           | +++     | ++       | +       | ~1000    | 90      | 9          | 4,500,000                     | 6.65 |
|                      |                                     |       |                    | Charcoal                                                                                                        | +++     | ++       | +       | ~1000    | 77      | 5          |                               |      |
|                      | Pre-treatment<br>(run 2)            | 4     |                    | Plain                                                                                                           | +++     | ++       | +       | ~500     | 23      | 5          | 1,400,000                     | 6.15 |
|                      |                                     |       |                    | Charcoal                                                                                                        | +++     | ++       | +       | ~500     | 28      | 2          |                               |      |
|                      |                                     | 5     |                    | Plain                                                                                                           | +++     | ++       | +       | ~1000    | 95      | 10         | 5,000,000                     | 6.70 |
|                      |                                     |       |                    | Charcoal                                                                                                        | +++     | ++       | +       | ~1000    | 66      | 9          |                               |      |
|                      |                                     | 6     |                    | Plain                                                                                                           | +++     | ++       | +       | ~200     | 28      | 2          | 1,400,000                     | 6.15 |
|                      |                                     |       |                    | Charcoal                                                                                                        | +++     | ++       | +       | ~200     |         | 1          |                               |      |
|                      | Pre-treatment<br>(run 3)            | 7     |                    | Plain                                                                                                           | +++     | ++       | +       | ~1000    | 131     | 3          | 1,500,000                     | 6.18 |
|                      |                                     |       |                    | Charcoal                                                                                                        | +++     | ++       | +       | ~1000    |         | 3          |                               |      |
|                      |                                     | 8     |                    | Plain                                                                                                           | +++     | ++       | + / ++  | +        | ~200    | 18         | 9,000,000                     | 6.95 |
|                      |                                     |       |                    | Charcoal                                                                                                        | +++     | ++       | + / ++  | +        | ~200    | 11         |                               |      |
|                      |                                     | 9     |                    | Plain                                                                                                           | +++     | ++       | +       | ~500     | 46      | 4          | 2,300,000                     | 6.36 |
|                      |                                     |       |                    | Charcoal                                                                                                        | +++     | ++       | +       | ~500     | 39      | 2          |                               |      |
| Day 1                | Untreated                           | 1     | Plain              | +++                                                                                                             | +++     | ++       | +       | ~120     | 9       | 4,500,000  | 6.65                          |      |
|                      |                                     |       | Charcoal           | +++                                                                                                             | +++     | ++       | +       | 75       | Contam. |            |                               |      |
|                      |                                     | 2     |                    | Plain                                                                                                           | +++     | ++ / +++ | ++      | +        |         | 14         | 8,500,000                     | 6.93 |
|                      |                                     |       |                    | Charcoal                                                                                                        | +++     | ++ / +++ | Contam. | +        |         | 17         |                               |      |
|                      |                                     | 3     |                    | Plain                                                                                                           | +++     | ++       | + / ++  | +        | 55      | 8          | 3,050,000                     | 6.48 |
|                      |                                     |       |                    | Charcoal                                                                                                        | +++     | ++       | + / ++  | +        | 61      | 11         |                               |      |
|                      |                                     | 4     |                    | Plain                                                                                                           | +++     | ++       | +       | ~1000    | ~150    | 16         | 11,000,000                    | 7.04 |
|                      |                                     |       |                    | Charcoal                                                                                                        | +++     | ++       | +       | ~1000    | ~103    | 22         |                               |      |
|                      |                                     | 5     |                    | Plain                                                                                                           | Contam. | Contam.  | +       | ~1000    | ~80     | 10         | 5,000,000                     | 6.70 |
|                      |                                     |       |                    | Charcoal                                                                                                        | Contam. | Contam.  | +       | ~1000    | ~80     | 8          |                               |      |
| Day 1                | Clofazimine A<br>Day 1,<br>25 mg/kg | 1     | Plain              | +++                                                                                                             | +++     | ++       | +       | ~200-250 | 20      | 12,500,000 | 7.10                          |      |
|                      |                                     |       | Charcoal           | +++                                                                                                             | +++     | ++       | +       | ~200-250 | 25      |            |                               |      |
|                      |                                     | 2     |                    | Plain                                                                                                           | Contam. | +++      | ++      | +        | 98      | 16         | 8,000,000                     | 6.90 |
|                      |                                     |       |                    | Charcoal                                                                                                        | Contam. | +++      | ++      | +        | 125     | 9          |                               |      |
|                      |                                     | 3     |                    | Plain                                                                                                           | +++     | ++       | + / ++  | ~200     | 19      | 0          | 950,000                       | 5.98 |
|                      |                                     |       |                    | Charcoal                                                                                                        | +++     | ++       | + / ++  | ~250     | 17      | 4          |                               |      |

**Table S1. Raw CFU count data from mouse lungs.**

| Time point                           | Treatment group                       | Mouse                                 | Agar plates | Final (4-week) CFU counts for the following 10-fold dilutions:<br>(highlighted cell used to calculate CFU/lung) |          |        |        |      |           | CFU/lung   | Log <sub>10</sub><br>CFU/lung |      |
|--------------------------------------|---------------------------------------|---------------------------------------|-------------|-----------------------------------------------------------------------------------------------------------------|----------|--------|--------|------|-----------|------------|-------------------------------|------|
|                                      |                                       |                                       |             | 0                                                                                                               | 1        | 2      | 3      | 4    | 5         |            |                               |      |
| Day 1                                | Clofazimine A                         | 4                                     | Plain       | Contam.                                                                                                         | ++       | + / ++ | +      | 40   | 2         | 2,000,000  | 6.30                          |      |
|                                      |                                       |                                       | Charcoal    | Contam.                                                                                                         | ++       | + / ++ | +      | 18   | 1         |            |                               |      |
|                                      |                                       | 5                                     | Plain       | +++                                                                                                             | ++       | +      | ~125   | 10   | 1         | 800,000    | 5.90                          |      |
|                                      |                                       |                                       | Charcoal    | +++                                                                                                             | ++       | +      | ~120   | 16   | 1         |            |                               |      |
|                                      | Clofazimine B<br>Day 1,<br>12.5 mg/kg | 1                                     | Plain       | +++                                                                                                             | ++       | +      | ~300   | 33   | 3         | 2,650,000  | 6.42                          |      |
|                                      |                                       |                                       | Charcoal    | +++                                                                                                             | ++       | +      | ~500   | 53   | 8         |            |                               |      |
|                                      |                                       | 2                                     | Plain       | ++                                                                                                              | ++       | + / ++ | ~200   | 25   | 2         | 1,450,000  | 6.16                          |      |
|                                      |                                       |                                       | Charcoal    | ++                                                                                                              | ++       | + / ++ | ~200   | 29   | 4         |            |                               |      |
|                                      |                                       | 3                                     | Plain       | +++                                                                                                             | ++ / +++ | ++     | +      | ~91  | 11        | 7,000,000  | 6.85                          |      |
|                                      |                                       |                                       | Charcoal    | +++                                                                                                             | ++ / +++ | ++     | +      | ~93  | 14        |            |                               |      |
|                                      |                                       | 4                                     | Plain       | Contam.                                                                                                         | Contam.  | ++     | +      | ~150 | 23        | 11,500,000 | 7.06                          |      |
|                                      |                                       |                                       | Charcoal    | Contam.                                                                                                         | Contam.  | ++     | +      | ~150 | 17        |            |                               |      |
|                                      |                                       | 5                                     | Plain       | ++                                                                                                              | ++       | + / ++ | +      | ~80  | 6         | 3,800,000  | 6.58                          |      |
|                                      |                                       |                                       | Charcoal    | ++                                                                                                              | ++       | + / ++ | +      | 76   | 8         |            |                               |      |
|                                      |                                       | Clofazimine C<br>Day 1,<br>6.25 mg/kg | 1           | Plain                                                                                                           | +++      | ++     | + / ++ | +    | 41        | 5          | 2,050,000                     | 6.31 |
|                                      |                                       |                                       |             | Charcoal                                                                                                        | +++      | ++     | + / ++ | +    | 39        | 2          |                               |      |
|                                      | 2                                     |                                       | Plain       | +++                                                                                                             | +++      | ++     | +      | 81   | 7         | 4,050,000  | 6.61                          |      |
|                                      |                                       |                                       | Charcoal    | +++                                                                                                             | +++      | ++     | +      | 47   | 5         |            |                               |      |
|                                      | 3                                     |                                       | Plain       | +++                                                                                                             | +++      | ++     | +      | ~80  | 0         | 2,550,000  | 6.41                          |      |
|                                      |                                       |                                       | Charcoal    | +++                                                                                                             | Contam.  | ++     | +      | 51   | Contam.   |            |                               |      |
|                                      | 4                                     |                                       | Plain       |                                                                                                                 | ++ / +++ | ++     | +      | 27   | 0         | 1,350,000  | 6.13                          |      |
|                                      |                                       |                                       | Charcoal    |                                                                                                                 | ++ / +++ | ++     | +      | 22   | 3         |            |                               |      |
|                                      | 5                                     |                                       | Plain       | +++                                                                                                             | ++       | + / ++ | +      | 44   | 0         | 2,650,000  | 6.42                          |      |
|                                      |                                       |                                       | Charcoal    | +++                                                                                                             | ++       | + / ++ | +      | 53   | 0         |            |                               |      |
|                                      | Clofazimine D<br>Day 1,<br>200 mg/kg  | 1                                     | Plain       | +++                                                                                                             | ++       | + / ++ | ~500   | 68   | 13        | 6,500,000  | 6.81                          |      |
|                                      |                                       |                                       | Charcoal    | +++                                                                                                             | ++       | + / ++ | ~500   | 99   | 12        |            |                               |      |
|                                      |                                       | 2                                     | Plain       | +++                                                                                                             | ++       | + / ++ | ~150   | 17   | 3         | 1,300,000  | 6.11                          |      |
| Charcoal                             |                                       |                                       | +++         | ++                                                                                                              | +        | ~200   | 26     | 2    |           |            |                               |      |
| 3                                    |                                       | Plain                                 | +++         | +++                                                                                                             | + / ++   | +      | 70     | 12   | 6,000,000 | 6.78       |                               |      |
|                                      |                                       | Charcoal                              | +++         | +++                                                                                                             | + / ++   | +      | 130    | 10   |           |            |                               |      |
| 4                                    |                                       | Plain                                 | +++         | ++                                                                                                              | + / ++   | ~150   | 30     | 0    | 2,150,000 | 6.33       |                               |      |
|                                      |                                       | Charcoal                              | +++         | ++                                                                                                              | + / ++   | ~200   | 43     | 2    |           |            |                               |      |
| 5                                    |                                       | Plain                                 | +++         | ++                                                                                                              | +        | ~250   | 49     | 4    | 2,900,000 | 6.46       |                               |      |
|                                      |                                       | Charcoal                              | +++         | ++                                                                                                              | +        | ~300   | 58     | 7    |           |            |                               |      |
| Clofazimine E<br>Day 1,<br>100 mg/kg | 1                                     | Plain                                 | Contam.     | ++ / +++                                                                                                        | + / ++   | +      | 18     | 1    | 1,250,000 | 6.10       |                               |      |
|                                      |                                       | Charcoal                              | Contam.     | ++ / +++                                                                                                        | + / ++   | +      | 25     | 1    |           |            |                               |      |
|                                      | 2                                     | Plain                                 | +++         | ++                                                                                                              | + / ++   | +      | 24     | 0    | 1,450,000 | 6.16       |                               |      |
|                                      |                                       | Charcoal                              | +++         | ++                                                                                                              | + / ++   | +      | 29     | 2    |           |            |                               |      |
|                                      | 3                                     | Plain                                 | +++         | ++                                                                                                              | + / ++   | +      | 19     | 0    | 1,350,000 | 6.13       |                               |      |
|                                      |                                       | Charcoal                              | +++         | ++                                                                                                              | + / ++   | +      | 27     | 0    |           |            |                               |      |
|                                      | 4                                     | Plain                                 | +++         | ++                                                                                                              | + / ++   | ~200   | 26     | 0    | 1,750,000 | 6.24       |                               |      |
|                                      |                                       | Charcoal                              | +++         | ++                                                                                                              | + / ++   | ~250   | 35     | 2    |           |            |                               |      |
|                                      | 5                                     | Plain                                 | 0           | ++                                                                                                              | + / ++   | +      | 14     | 1    | 1,350,000 | 6.13       |                               |      |
|                                      |                                       | Charcoal                              | +++         | ++                                                                                                              | + / ++   | +      | 27     | 0    |           |            |                               |      |

**Table S1. Raw CFU count data from mouse lungs.**

| Time point                                     | Treatment group                                | Mouse    | Agar plates | Final (4-week) CFU counts for the following 10-fold dilutions:<br>(highlighted cell used to calculate CFU/lung) |         |         |         |         |           | CFU/lung   | Log <sub>10</sub><br>CFU/lung |
|------------------------------------------------|------------------------------------------------|----------|-------------|-----------------------------------------------------------------------------------------------------------------|---------|---------|---------|---------|-----------|------------|-------------------------------|
|                                                |                                                |          |             | 0                                                                                                               | 1       | 2       | 3       | 4       | 5         |            |                               |
| Day 1                                          | Clofazimine F<br>Day 1,<br>50 mg/kg            | 1        | Plain       | +++                                                                                                             | ++      | +/>++   | +       | 55      | 4         | 2,750,000  | 6.44                          |
|                                                |                                                |          | Charcoal    | +++                                                                                                             | ++      | +/>++   | +       | 36      | 4         |            |                               |
|                                                |                                                | 2        | Plain       | +++                                                                                                             | ++      | +/>++   | +       | 21      | 2         | 1,700,000  | 6.23                          |
|                                                |                                                |          | Charcoal    | Contam.                                                                                                         | ++      | Contam. | +       | 34      | 3         |            |                               |
|                                                |                                                | 3        | Plain       | +++                                                                                                             | +++     | ++      | +       | 79      | 4         | 4,850,000  | 6.69                          |
|                                                |                                                |          | Charcoal    | +++                                                                                                             | +++     | ++      | +       | 97      | 8         |            |                               |
|                                                |                                                | 4        | Plain       | +++                                                                                                             | +++     | ++      | +       | ~120    | 12        | 9,000,000  | 6.95                          |
|                                                |                                                |          | Charcoal    | +++                                                                                                             | +++     | ++      | Contam. | ~100    | 18        |            |                               |
|                                                |                                                | 5        | Plain       | Contam.                                                                                                         | +/+++   | ++      | +/>++   | 136     | 5         | 7,500,000  | 6.88                          |
|                                                |                                                |          | Charcoal    | Contam.                                                                                                         | +/+++   | ++      | +/>++   | 155     | 15        |            |                               |
| Day 2                                          | Untreated                                      | 1        | Plain       | +++                                                                                                             | ++      | +       | ~300    | 29      | 4         | 2,050,000  | 6.31                          |
|                                                |                                                |          | Charcoal    | +++                                                                                                             | ++      | +       | ~500    | 41      | 3         |            |                               |
|                                                |                                                | 2        | Plain       | Contam.                                                                                                         | Contam. | +       | ~700    | 75      | Contam.   | 3,750,000  | 6.57                          |
|                                                |                                                |          | Charcoal    | Contam.                                                                                                         | Contam. | +       | ~700    | 71      | Contam.   |            |                               |
|                                                |                                                | 3        | Plain       | +++                                                                                                             | ++      | +       | ~1000   | ~150    | 11        | 10,500,000 | 7.02                          |
|                                                |                                                |          | Charcoal    | +++                                                                                                             | ++      | +       | ~1000   | ~150    | 21        |            |                               |
|                                                |                                                | 4        | Plain       | +++                                                                                                             | ++      | +       | ~300    | 26      | 3         | 1,650,000  | 6.22                          |
|                                                |                                                |          | Charcoal    | Contam.                                                                                                         | ++      | +       | ~500    | 33      | 3         |            |                               |
|                                                |                                                | 5        | Plain       | +++                                                                                                             | ++      | +       | ~300    | 35      | 4         | 2,600,000  | 6.41                          |
|                                                |                                                |          | Charcoal    | +++                                                                                                             | ++      | +       | ~500    | 52      | 4         |            |                               |
|                                                | Clofazimine A<br>Days 1-2,<br>25 mg/kg daily   | 1        | Plain       | +++                                                                                                             | ++      | +       | ~250    | 28      | 1         | 1,400,000  | 6.15                          |
|                                                |                                                |          | Charcoal    | +++                                                                                                             | ++      | +       | ~250    | 28      | 1         |            |                               |
|                                                |                                                | 2        | Plain       | 0                                                                                                               | ++      | +       | ~1000   | 88      | 13        | 6,500,000  | 6.81                          |
|                                                |                                                |          | Charcoal    | +++                                                                                                             | ++      | +       | ~1000   | 116     | 10        |            |                               |
|                                                |                                                | 3        | Plain       | 0                                                                                                               | ++      | +       | ~1000   | 82      | 8         | 4,950,000  | 6.69                          |
|                                                |                                                |          | Charcoal    | 0                                                                                                               | ++      | +       | ~1000   | 99      | 8         |            |                               |
|                                                |                                                | 4        | Plain       | Inhib.                                                                                                          | ++      | +       | ~300    | 32      | 3         | 1,900,000  | 6.28                          |
|                                                |                                                |          | Charcoal    | +++                                                                                                             | ++      | +       | ~300    | 38      | 1         |            |                               |
|                                                |                                                | 5        | Plain       | +++                                                                                                             | ++      | +       | ~1000   | ~150    | 21        | 10,500,000 | 7.02                          |
|                                                |                                                |          | Charcoal    | +++                                                                                                             | ++      | +       | ~1000   | ~150    | 21        |            |                               |
|                                                | Clofazimine B<br>Days 1-2,<br>12.5 mg/kg daily | 1        | Plain       | 0                                                                                                               | ++      | +       | ~500    | 50      | 5         | 2,500,000  | 6.40                          |
|                                                |                                                |          | Charcoal    | Contam.                                                                                                         | Contam. | Contam. | Contam. | Contam. | Contam.   |            |                               |
|                                                |                                                | 2        | Plain       | 0                                                                                                               | ++      | +       | ~1000   | 92      | 1         | 4,600,000  | 6.66                          |
|                                                |                                                |          | Charcoal    | +++                                                                                                             | ++      | +       | ~1000   | 80      | 5         |            |                               |
|                                                |                                                | 3        | Plain       | +++                                                                                                             | ++      | +       | ~1000   | 120     | 4         | 2,000,000  | 6.30                          |
|                                                |                                                |          | Charcoal    | +++                                                                                                             | ++      | +       | ~1000   | 170     | 4         |            |                               |
| 4                                              |                                                | Plain    | +++         | ++                                                                                                              | +       | ~350    | 32      | 0       | 2,000,000 | 6.30       |                               |
|                                                |                                                | Charcoal | +++         | ++                                                                                                              | +       | ~350    | 40      | 1       |           |            |                               |
| 5                                              |                                                | Plain    | +++         | ++                                                                                                              | +       | ~500    | 43      | 1       | 2,600,000 | 6.41       |                               |
|                                                |                                                | Charcoal | +++         | ++                                                                                                              | +       | ~500    | 52      | 2       |           |            |                               |
| Clofazimine C<br>Days 1-2,<br>6.25 mg/kg daily | 1                                              | Plain    | 0           | ++                                                                                                              | +       |         | 21      | 3       | 1,050,000 | 6.02       |                               |
|                                                |                                                | Charcoal | +++         | ++                                                                                                              | +       |         | 16      | 1       |           |            |                               |
|                                                | 2                                              | Plain    | Inhib.      | ++                                                                                                              | +       | ~300    | 33      | 0       | 2,250,000 | 6.35       |                               |
|                                                |                                                | Charcoal | +++         | ++                                                                                                              | +       | ~300    | 45      | 0       |           |            |                               |
|                                                | 3                                              | Plain    | 0           | ++                                                                                                              | +       | ~130    | 12      | 0       | 600,000   | 5.78       |                               |
|                                                |                                                | Charcoal | 0           | ++                                                                                                              | +       | ~100    | 9       | 0       |           |            |                               |

**Table S1. Raw CFU count data from mouse lungs.**

| Time point                                                 | Treatment group                                              | Mouse                                                       | Agar plates | Final (4-week) CFU counts for the following 10-fold dilutions:<br>(highlighted cell used to calculate CFU/lung) |     |       |         |      |           | CFU/lung  | Log <sub>10</sub><br>CFU/lung |      |
|------------------------------------------------------------|--------------------------------------------------------------|-------------------------------------------------------------|-------------|-----------------------------------------------------------------------------------------------------------------|-----|-------|---------|------|-----------|-----------|-------------------------------|------|
|                                                            |                                                              |                                                             |             | 0                                                                                                               | 1   | 2     | 3       | 4    | 5         |           |                               |      |
| Day 2                                                      | Clofazimine C                                                | 4                                                           | Plain       | +++                                                                                                             | ++  | +     | ~150    | 21   | 1         | 1,050,000 | 6.02                          |      |
|                                                            |                                                              |                                                             | Charcoal    | +++                                                                                                             | ++  | +     | ~150    | 26   | 0         |           |                               |      |
|                                                            |                                                              | 5                                                           | Plain       | Inhib.                                                                                                          | ++  | +     | ~500    | ~66  | 8         | 4,000,000 | 6.60                          |      |
|                                                            |                                                              |                                                             | Charcoal    | 0                                                                                                               | ++  | +     | ~500    | ~61  | 7         |           |                               |      |
|                                                            | Clofazimine D<br>Day 1,<br>200 mg/kg;<br>Day 2,<br>100 mg/kg | 1                                                           | Plain       | 0                                                                                                               | 0   | +     | ~2000   | ~200 | 9         | 9,500,000 | 6.98                          |      |
|                                                            |                                                              |                                                             | Charcoal    | 0                                                                                                               | ++  | +     | ~1000   | ~200 | 19        |           |                               |      |
|                                                            |                                                              | 2                                                           | Plain       | 0                                                                                                               | ++  | +     | ~300    | 31   | 4         | 2,550,000 | 6.41                          |      |
|                                                            |                                                              |                                                             | Charcoal    | +++                                                                                                             | ++  | +     | ~300    | 51   | 5         |           |                               |      |
|                                                            |                                                              | 3                                                           | Plain       | 0                                                                                                               | ++  | +     | ~200    | 16   | 3         | 950,000   | 5.98                          |      |
|                                                            |                                                              |                                                             | Charcoal    | +++                                                                                                             | ++  | +     | ~200    | 19   | 3         |           |                               |      |
|                                                            |                                                              | 4                                                           | Plain       | 0                                                                                                               | ++  | +     | ~400    | 39   | 4         | 1,950,000 | 6.29                          |      |
|                                                            |                                                              |                                                             | Charcoal    | +++                                                                                                             | ++  | +     | ~350    | 35   | 4         |           |                               |      |
|                                                            |                                                              | 5                                                           | Plain       | 0                                                                                                               | ++  | +     | ~500    | 41   | 1         | 3,100,000 | 6.49                          |      |
|                                                            |                                                              |                                                             | Charcoal    | +++                                                                                                             | ++  | +     | ~500    | 62   | 4         |           |                               |      |
|                                                            |                                                              | Clofazimine E<br>Day 1,<br>100 mg/kg;<br>Day 2,<br>75 mg/kg | 1           | Plain                                                                                                           | 0   | ++    | +       | ~120 | 12        | 2         | 600,000                       | 5.78 |
|                                                            |                                                              |                                                             |             | Charcoal                                                                                                        |     | ++    | +       | ~120 | 12        | 0         |                               |      |
|                                                            | 2                                                            |                                                             | Plain       | 0                                                                                                               | 0   | ++    | +       | 126  | 8         | 4,000,000 | 6.60                          |      |
|                                                            |                                                              |                                                             | Charcoal    | +++                                                                                                             | +++ | ++    | +       | 150  | 3         |           |                               |      |
|                                                            | 3                                                            |                                                             | Plain       | 0                                                                                                               | ++  | +     | ~300    | 62   | 7         | 4,400,000 | 6.64                          |      |
|                                                            |                                                              |                                                             | Charcoal    | +++                                                                                                             | ++  | +     | ~300    | 88   | 15        |           |                               |      |
| 4                                                          | Plain                                                        |                                                             | 0           | ++                                                                                                              | +   | ~150  | 27      | 1    | 2,700,000 | 6.43      |                               |      |
|                                                            | Charcoal                                                     |                                                             | +++         | ++                                                                                                              | +   | ~200  | 54      | 1    |           |           |                               |      |
| 5                                                          | Plain                                                        |                                                             | 0           | ++                                                                                                              | +   | +     | 120     | 0    | 6,000,000 | 6.78      |                               |      |
|                                                            | Charcoal                                                     |                                                             | +++         | ++                                                                                                              | +   | ~1000 | ~120    | 0    |           |           |                               |      |
| Clofazimine F<br>Day 1,<br>50 mg/kg;<br>Day 2,<br>25 mg/kg | 1                                                            | Plain                                                       | 0           | ++                                                                                                              | +   | ~300  | 37      | 3    | 1,850,000 | 6.27      |                               |      |
|                                                            |                                                              | Charcoal                                                    | +++         | ++                                                                                                              | +   | ~300  | 27      | 6    |           |           |                               |      |
|                                                            | 2                                                            | Plain                                                       | Inhib.      | ++                                                                                                              | +   | ~500  | 42      | 6    | 3,250,000 | 6.51      |                               |      |
|                                                            |                                                              | Charcoal                                                    | +++         | ++                                                                                                              | +   | ~500  | 65      | 10   |           |           |                               |      |
|                                                            | 3                                                            | Plain                                                       | Inhib.      | ++                                                                                                              | ++  | ~500  | Contam. | 5    | 2,050,000 | 6.31      |                               |      |
|                                                            |                                                              | Charcoal                                                    | +++         | ++                                                                                                              | +   | ~500  | 41      | 5    |           |           |                               |      |
|                                                            | 4                                                            | Plain                                                       | Inhib.      | ++                                                                                                              | ++  | ~500  | 51      | 7    | 3,600,000 | 6.56      |                               |      |
|                                                            |                                                              | Charcoal                                                    | +++         | ++                                                                                                              | +   | ~500  | 72      | 5    |           |           |                               |      |
|                                                            | 5                                                            | Plain                                                       | 0           | +++                                                                                                             | ++  | +     | 74      | 13   | 3,700,000 | 6.57      |                               |      |
|                                                            |                                                              | Charcoal                                                    | +++         | ++                                                                                                              | ++  | +     | ~76     | 7    |           |           |                               |      |
| Day 7<br>(Week 1)                                          | Untreated                                                    | 1                                                           | Plain       | +++                                                                                                             | ++  | +     | ~500    | 41   | 0         | 2,200,000 | 6.34                          |      |
|                                                            |                                                              |                                                             | Charcoal    | +++                                                                                                             | ++  | +     | ~500    | 44   | 8         |           |                               |      |
|                                                            |                                                              | 2                                                           | Plain       | +++                                                                                                             | ++  | +     | ~200    | 28   | 2         | 1,400,000 | 6.15                          |      |
|                                                            |                                                              |                                                             | Charcoal    | +++                                                                                                             | ++  | +     | ~200    | 17   | 1         |           |                               |      |
|                                                            |                                                              | 3                                                           | Plain       | +++                                                                                                             | +++ | ++    | +       | 92   | 7         | 6,000,000 | 6.78                          |      |
|                                                            |                                                              |                                                             | Charcoal    | +++                                                                                                             | +++ | ++    | +       | 116  | 12        |           |                               |      |
|                                                            |                                                              | 4                                                           | Plain       | +++                                                                                                             | ++  | +     | ~1000   | 70   | 5         | 6,000,000 | 6.78                          |      |
|                                                            |                                                              |                                                             | Charcoal    | +++                                                                                                             | ++  | +     | ~1000   | 101  | 12        |           |                               |      |
|                                                            |                                                              | 5                                                           | Plain       | +++                                                                                                             | ++  | +     | ~250    | 24   | 2         | 2,000,000 | 6.30                          |      |
|                                                            |                                                              |                                                             | Charcoal    | +++                                                                                                             | ++  | +     | ~300    | 40   | 5         |           |                               |      |

**Table S1. Raw CFU count data from mouse lungs.**

| Time point                                                                                   | Treatment group                                                                             | Mouse                                          | Agar plates | Final (4-week) CFU counts for the following 10-fold dilutions:<br>(highlighted cell used to calculate CFU/lung) |         |       |         |         |           | CFU/lung   | Log <sub>10</sub><br>CFU/lung |      |
|----------------------------------------------------------------------------------------------|---------------------------------------------------------------------------------------------|------------------------------------------------|-------------|-----------------------------------------------------------------------------------------------------------------|---------|-------|---------|---------|-----------|------------|-------------------------------|------|
|                                                                                              |                                                                                             |                                                |             | 0                                                                                                               | 1       | 2     | 3       | 4       | 5         |            |                               |      |
| Day 7<br>(Week 1)                                                                            | Clofazimine A<br>Days 1-7,<br>25 mg/kg daily                                                | 1                                              | Plain       | 0                                                                                                               | ++      | +     | ~260    | 28      | 4         | 2,100,000  | 6.32                          |      |
|                                                                                              |                                                                                             |                                                | Charcoal    | +++                                                                                                             | ++      | +     | ~260    | 42      | 5         |            |                               |      |
|                                                                                              |                                                                                             | 2                                              | Plain       | 0                                                                                                               | ++      | +     | ~100    | 15      | 1         | 850,000    | 5.93                          |      |
|                                                                                              |                                                                                             |                                                | Charcoal    | +++                                                                                                             | ++      | +     | ~150    | 17      | 1         |            |                               |      |
|                                                                                              |                                                                                             | 3                                              | Plain       | 0                                                                                                               | ++      | +     | ~250    | 26      | 3         | 2,000,000  | 6.30                          |      |
|                                                                                              |                                                                                             |                                                | Charcoal    | +++                                                                                                             | ++      | +     | ~250    | 40      | 1         |            |                               |      |
|                                                                                              |                                                                                             | 4                                              | Plain       | 0                                                                                                               | +       | ~1000 | 84      | 6       | 1         | 500,000    | 5.70                          |      |
|                                                                                              |                                                                                             |                                                | Charcoal    | +                                                                                                               | +       | ~1000 | ~120    | 10      | 1         |            |                               |      |
|                                                                                              |                                                                                             | 5                                              | Plain       | Inhib.                                                                                                          | ++      | +     | ~280    | Contam. | 9         | 6,000,000  | 6.78                          |      |
|                                                                                              |                                                                                             |                                                | Charcoal    | +++                                                                                                             | ++      | +     | ~500    | Contam. | 12        |            |                               |      |
|                                                                                              |                                                                                             | Clofazimine B<br>Days 1-7,<br>12.5 mg/kg daily | 1           | Plain                                                                                                           | 0       | ++    | +       | ~180    | 22        | 0          | 1,100,000                     | 6.04 |
|                                                                                              |                                                                                             |                                                |             | Charcoal                                                                                                        | Inhib.  | ++    | +       | ~200    | 15        | 0          |                               |      |
|                                                                                              | 2                                                                                           |                                                | Plain       | 0                                                                                                               | ++      | +     | ~160    | 16      | 0         | 800,000    | 5.90                          |      |
|                                                                                              |                                                                                             |                                                | Charcoal    | Inhib.                                                                                                          | ++      | +     | ~200    | 15      | 6         |            |                               |      |
|                                                                                              | 3                                                                                           |                                                | Plain       | 0                                                                                                               | ++      | +     | ~240    | 24      | 1         | 1,200,000  | 6.08                          |      |
|                                                                                              |                                                                                             |                                                | Charcoal    | 0                                                                                                               | ++      | +     | ~200    | 12      | 2         |            |                               |      |
|                                                                                              | 4                                                                                           |                                                | Plain       | 0                                                                                                               | Inhib.  | +     | ~100    | 10      | 0         | 600,000    | 5.78                          |      |
|                                                                                              |                                                                                             |                                                | Charcoal    | 0                                                                                                               | ++      | +     | ~100    | 12      | 0         |            |                               |      |
|                                                                                              | 5                                                                                           |                                                | Plain       | 0                                                                                                               | ++      | +     | ~200    | 36      | 3         | 1,800,000  | 6.26                          |      |
|                                                                                              |                                                                                             |                                                | Charcoal    | +++                                                                                                             | ++      | +     | ~250    | 30      | 5         |            |                               |      |
|                                                                                              | Clofazimine C<br>Days 1-7,<br>6.25 mg/kg daily                                              |                                                | 1           | Plain                                                                                                           | 0       | ++    | +       | ~200    | 20        | 1          | 1,250,000                     | 6.10 |
|                                                                                              |                                                                                             |                                                |             | Charcoal                                                                                                        | +++     | ++    | +       | ~200    | 25        | 1          |                               |      |
|                                                                                              |                                                                                             | 2                                              | Plain       | 0                                                                                                               | +++     | +     | ~250    | 26      | 1         | 2,050,000  | 6.31                          |      |
|                                                                                              |                                                                                             |                                                | Charcoal    | +++                                                                                                             | ++      | +     | ~300    | 41      | 8         |            |                               |      |
|                                                                                              |                                                                                             | 3                                              | Plain       | Inhib.                                                                                                          | ++      | +     | ~500    | 40      | 5         | 3,150,000  | 6.50                          |      |
|                                                                                              |                                                                                             |                                                | Charcoal    | +++                                                                                                             | ++      | +     | ~500    | 63      | 6         |            |                               |      |
|                                                                                              |                                                                                             | 4                                              | Plain       | 0                                                                                                               | +++     | ++    | +       | ~150    | 18        | 14,500,000 | 7.16                          |      |
|                                                                                              |                                                                                             |                                                | Charcoal    | +++                                                                                                             | +++     | ++    | +       | ~200    | 29        |            |                               |      |
| 5                                                                                            |                                                                                             | Plain                                          | Inhib.      | ++                                                                                                              | +       | ~250  | 21      | 3       | 1,200,000 | 6.08       |                               |      |
|                                                                                              |                                                                                             | Charcoal                                       | +++         | ++                                                                                                              | +       | ~250  | 24      | 2       |           |            |                               |      |
| Clofazimine D<br>Day 1,<br>200 mg/kg;<br>Day 2,<br>100 mg/kg;<br>Days 3-7,<br>75 mg/kg daily |                                                                                             | 1                                              | Plain       | 0                                                                                                               | ++      | +     | ~150    | 22      | 5         | 1,600,000  | 6.20                          |      |
|                                                                                              |                                                                                             |                                                | Charcoal    | +++                                                                                                             | ++      | +     | ~200    | 32      | 5         |            |                               |      |
|                                                                                              | 2                                                                                           | Plain                                          | 0           | 0                                                                                                               | +       | 168   | 6       | 0       | 800,000   | 5.90       |                               |      |
|                                                                                              |                                                                                             | Charcoal                                       | +++         | ++                                                                                                              | +       | ~150  | 16      | 0       |           |            |                               |      |
|                                                                                              | 3                                                                                           | Plain                                          | 0           | Inhib.                                                                                                          | +       | ~100  | 10      | 1       | 500,000   | 5.70       |                               |      |
|                                                                                              |                                                                                             | Charcoal                                       | +++         | ++                                                                                                              | +       | ~100  | 7       | 0       |           |            |                               |      |
|                                                                                              | 4                                                                                           | Plain                                          | 0           | +                                                                                                               | ~500    | 45    | 4       | 0       | 400,000   | 5.60       |                               |      |
|                                                                                              |                                                                                             | Charcoal                                       | ++          | +                                                                                                               | ~1000   | 80    | 8       | 0       |           |            |                               |      |
|                                                                                              | 5                                                                                           | Plain                                          | 0           | ++                                                                                                              | +       | ~100  | 16      | 2       | 900,000   | 5.95       |                               |      |
|                                                                                              |                                                                                             | Charcoal                                       | +++         | ++                                                                                                              | Contam. | ~150  | 18      | 3       |           |            |                               |      |
|                                                                                              | Clofazimine E<br>Day 1,<br>100 mg/kg;<br>Day 2,<br>75 mg/kg;<br>Days 3-7,<br>50 mg/kg daily | 1                                              | Plain       | 0                                                                                                               | Inhib.  | +     | ~500    | 67      | 10        | 5,000,000  | 6.70                          |      |
|                                                                                              |                                                                                             |                                                | Charcoal    | +++                                                                                                             | ++      | +     | Contam. | ~70     | 7         |            |                               |      |
| 2                                                                                            |                                                                                             | Plain                                          | 0           | ++                                                                                                              | +       | 110   | 17      | 1       | 850,000   | 5.93       |                               |      |
|                                                                                              |                                                                                             | Charcoal                                       | +++         | ++                                                                                                              | +       | 130   | Contam. | 3       |           |            |                               |      |
| 3                                                                                            |                                                                                             | Plain                                          | 0           | Inhib.                                                                                                          | +       | ~400  | 42      | 1       | 2,100,000 | 6.32       |                               |      |
|                                                                                              |                                                                                             | Charcoal                                       | 0           | ++                                                                                                              | +       | ~400  | 19      | 9       |           |            |                               |      |



**Table S1. Raw CFU count data from mouse lungs.**

| Time point                                                           | Treatment group                                                                              | Mouse                                                                                         | Agar plates | Final (4-week) CFU counts for the following 10-fold dilutions:<br>(highlighted cell used to calculate CFU/lung) |         |         |         |         |           | CFU/lung | Log <sub>10</sub><br>CFU/lung |      |
|----------------------------------------------------------------------|----------------------------------------------------------------------------------------------|-----------------------------------------------------------------------------------------------|-------------|-----------------------------------------------------------------------------------------------------------------|---------|---------|---------|---------|-----------|----------|-------------------------------|------|
|                                                                      |                                                                                              |                                                                                               |             | 0                                                                                                               | 1       | 2       | 3       | 4       | 5         |          |                               |      |
| Day 14<br>(Week 2)                                                   | Clofazimine C<br>Days 1-14,<br>6.25 mg/kg daily                                              | 1                                                                                             | Plain       | Inhib.                                                                                                          | ++      | +       | ~150    | 8       | 0         | 400,000  | 5.60                          |      |
|                                                                      |                                                                                              |                                                                                               | Charcoal    | +++                                                                                                             | Contam. | Contam. | Contam. | Contam. | Contam.   |          |                               |      |
|                                                                      |                                                                                              | 2                                                                                             | Plain       | Inhib.                                                                                                          | Inhib.  | +       | ~100    | 6       | 0         | 300,000  | 5.48                          |      |
|                                                                      |                                                                                              |                                                                                               | Charcoal    | ++/+++                                                                                                          | Contam. | Contam. | Contam. | Contam. | Contam.   |          |                               |      |
|                                                                      |                                                                                              | 3                                                                                             | Plain       | Inhib.                                                                                                          | Inhib.  | +       | ~150    | 13      | 0         | 650,000  | 5.81                          |      |
|                                                                      |                                                                                              |                                                                                               | Charcoal    | Contam.                                                                                                         | Contam. | Contam. | Contam. | Contam. | Contam.   |          |                               |      |
|                                                                      |                                                                                              | 4                                                                                             | Plain       | Inhib.                                                                                                          | +       | ~260    | 21      | 6       | 0         | 105,000  | 5.02                          |      |
|                                                                      |                                                                                              |                                                                                               | Charcoal    | ++                                                                                                              | Contam. | Contam. | Contam. | Contam. | Contam.   |          |                               |      |
|                                                                      |                                                                                              | 5                                                                                             | Plain       | Inhib.                                                                                                          | + / ++  | +       | ~80     | 8       | 1         | 400,000  | 5.60                          |      |
|                                                                      |                                                                                              |                                                                                               | Charcoal    | ++                                                                                                              | Contam. | Contam. | Contam. | Contam. | Contam.   |          |                               |      |
|                                                                      |                                                                                              | Clofazimine D<br>Day 1,<br>200 mg/kg;<br>Day 2,<br>100 mg/kg;<br>Days 3-14,<br>75 mg/kg daily | 1           | Plain                                                                                                           | 0       | 0       | ~1000   | 44      | 10        | 0        | 220,000                       | 5.34 |
|                                                                      |                                                                                              |                                                                                               |             | Charcoal                                                                                                        | ++      | Contam. | ~1000   | Contam. | Contam.   | Contam.  |                               |      |
|                                                                      | 2                                                                                            |                                                                                               | Plain       | 0                                                                                                               | 0       | ~200    | 31      | 5       | 1         | 250,000  | 5.40                          |      |
|                                                                      |                                                                                              |                                                                                               | Charcoal    | ++                                                                                                              | Contam. | Contam. | Contam. | Contam. | Contam.   |          |                               |      |
|                                                                      | 3                                                                                            |                                                                                               | Plain       | 0                                                                                                               | 0       | 52      | 6       | 0       | 0         | 36,500   | 4.56                          |      |
|                                                                      |                                                                                              |                                                                                               | Charcoal    | 0                                                                                                               | +       | 73      | 3       | 1       | 0         |          |                               |      |
|                                                                      | 4                                                                                            |                                                                                               | Plain       | 0                                                                                                               | 0       | Inhib.  | ~120    | 18      | 5         | 900,000  | 5.95                          |      |
|                                                                      |                                                                                              |                                                                                               | Charcoal    | +++                                                                                                             | ++      | +       | ~150    | 15      | 0         |          |                               |      |
|                                                                      | 5                                                                                            |                                                                                               | Plain       | 0                                                                                                               | 0       | ~220    | 55      | 4       | 0         | 275,000  | 5.44                          |      |
|                                                                      |                                                                                              |                                                                                               | Charcoal    | 0                                                                                                               | +       | ~300    | 39      | 3       | 0         |          |                               |      |
|                                                                      | Clofazimine E<br>Day 1,<br>100 mg/kg;<br>Day 2,<br>75 mg/kg;<br>Days 3-14,<br>50 mg/kg daily |                                                                                               | 1           | Plain                                                                                                           | 0       | 0       | +       | ~500    | 41        | 3        | 2,050,000                     | 6.31 |
|                                                                      |                                                                                              |                                                                                               |             | Charcoal                                                                                                        | +++     | Contam. | Contam. | Contam. | Contam.   | Contam.  |                               |      |
|                                                                      |                                                                                              | 2                                                                                             | Plain       | 0                                                                                                               | Inhib.  | +       | ~130    | 3       | 2         | 450,000  | 5.65                          |      |
|                                                                      |                                                                                              |                                                                                               | Charcoal    | +++                                                                                                             | ++      | +       | ~150    | 9       | 0         |          |                               |      |
| 3                                                                    |                                                                                              | Plain                                                                                         | 0           | ++                                                                                                              | +       | ~150    | 16      | 0       | 800,000   | 5.90     |                               |      |
|                                                                      |                                                                                              | Charcoal                                                                                      | +++         | Contam.                                                                                                         | Contam. | Contam. | Contam. | 0       |           |          |                               |      |
| 4                                                                    |                                                                                              | Plain                                                                                         | 0           | 0                                                                                                               | ~1000   | 68      | 12      | 1       | 950,000   | 5.98     |                               |      |
|                                                                      |                                                                                              | Charcoal                                                                                      | 0           | ++                                                                                                              | +       | ~150    | 19      | 0       |           |          |                               |      |
| 5                                                                    |                                                                                              | Plain                                                                                         | 0           | 0                                                                                                               | ~200    | 23      | 1       | 0       | 115,000   | 5.06     |                               |      |
|                                                                      |                                                                                              | Charcoal                                                                                      | ++          | Contam.                                                                                                         | Contam. | Contam. | Contam. | Contam. |           |          |                               |      |
| Clofazimine F<br>Day 1,<br>50 mg/kg;<br>Days 2-14,<br>25 mg/kg daily |                                                                                              | 1                                                                                             | Plain       | 0                                                                                                               | + / ++  | +       | ~100    | 9       | 0         | 450,000  | 5.65                          |      |
|                                                                      |                                                                                              |                                                                                               | Charcoal    | Contam.                                                                                                         | Contam. | Contam. | Contam. | Contam. | Contam.   |          |                               |      |
|                                                                      | 2                                                                                            | Plain                                                                                         | 0           | Inhib.                                                                                                          | ~250    | 25      | 3       | 0       | 220,000   | 5.34     |                               |      |
|                                                                      |                                                                                              | Charcoal                                                                                      | ++          | +                                                                                                               | ~500    | 44      | 3       | 1       |           |          |                               |      |
|                                                                      | 3                                                                                            | Plain                                                                                         | 0           | 0                                                                                                               | 40      | 6       | 0       | 0       | 30,000    | 4.48     |                               |      |
|                                                                      |                                                                                              | Charcoal                                                                                      | ++          | Contam.                                                                                                         | Contam. | Contam. | Contam. | Contam. |           |          |                               |      |
|                                                                      | 4                                                                                            | Plain                                                                                         | 0           | Inhib.                                                                                                          | +       | ~200    | 25      | 3       | 1,250,000 | 6.10     |                               |      |
|                                                                      |                                                                                              | Charcoal                                                                                      | +++         | ++                                                                                                              | Contam. | Contam. | Contam. | Contam. |           |          |                               |      |
|                                                                      | 5                                                                                            | Plain                                                                                         | 0           | Inhib.                                                                                                          | ~400    | 58      | 0       | 0       | 315,000   | 5.50     |                               |      |
|                                                                      |                                                                                              | Charcoal                                                                                      | ++          | +                                                                                                               | ~400    | 63      | Contam. | Contam. |           |          |                               |      |
|                                                                      | Day 28<br>(Week 4)                                                                           | Untreated                                                                                     | 1           | Plain                                                                                                           | 0       | ++      | ~800    | 139     | 18        | 0        | 1,200,000                     | 6.08 |
|                                                                      |                                                                                              |                                                                                               |             | Charcoal                                                                                                        | Contam. | Contam. | Contam. | Contam. | 24        | 0        |                               |      |
| 2                                                                    |                                                                                              |                                                                                               | Plain       | Inhib.                                                                                                          | +       | ~800    | 89      | 4       | 0         | 550,000  | 5.74                          |      |
|                                                                      |                                                                                              |                                                                                               | Charcoal    | Contam.                                                                                                         | +       | ~1000   | 142     | 11      | 0         |          |                               |      |
| 3                                                                    |                                                                                              |                                                                                               | Plain       | Inhib.                                                                                                          | +       | ~500    | 62      | 1       | 0         | 800,000  | 5.90                          |      |
|                                                                      |                                                                                              |                                                                                               | Charcoal    | Contam.                                                                                                         | Contam. | Contam. | Contam. | 16      | 0         |          |                               |      |



**Table S1. Raw CFU count data from mouse lungs.**

| Time point                                                                                                                          | Treatment group                                         | Mouse                                                   | Agar plates | Final (4-week) CFU counts for the following 10-fold dilutions:<br>(highlighted cell used to calculate CFU/lung) |         |         |         |         |         | CFU/lung  | Log <sub>10</sub><br>CFU/lung |      |
|-------------------------------------------------------------------------------------------------------------------------------------|---------------------------------------------------------|---------------------------------------------------------|-------------|-----------------------------------------------------------------------------------------------------------------|---------|---------|---------|---------|---------|-----------|-------------------------------|------|
|                                                                                                                                     |                                                         |                                                         |             | 0                                                                                                               | 1       | 2       | 3       | 4       | 5       |           |                               |      |
| Day 28<br>(Week 4)                                                                                                                  | Untreated                                               | 4                                                       | Plain       | Inhib.                                                                                                          | +       | ~1000   | 122     | 14      | 0       | 800,000   | 5.90                          |      |
|                                                                                                                                     |                                                         |                                                         | Charcoal    | Contam.                                                                                                         | Contam. | Contam. | Contam. | 16      | 1       |           |                               |      |
|                                                                                                                                     |                                                         | 5                                                       | Plain       | Inhib.                                                                                                          | Inhib.  | +       | ~500    | 62      | 9       | 3,100,000 | 6.49                          |      |
|                                                                                                                                     |                                                         |                                                         | Charcoal    | Contam.                                                                                                         | Contam. | Contam. | Contam. | 61      | 9       |           |                               |      |
|                                                                                                                                     | Clofazimine A<br>Day 1 -<br>Week 4,<br>25 mg/kg daily   | 1                                                       | Plain       | 0                                                                                                               | Inhib.  | 96      | 6       | 0       | 0       | 65,000    | 4.81                          |      |
|                                                                                                                                     |                                                         |                                                         | Charcoal    | +                                                                                                               | ~1000   | 112     | 13      | 0       | 0       |           |                               |      |
|                                                                                                                                     |                                                         | 2                                                       | Plain       | 0                                                                                                               | Inhib.  | 25      | 0       | 0       | 0       | 15,500    | 4.19                          |      |
|                                                                                                                                     |                                                         |                                                         | Charcoal    | 0                                                                                                               | ~300    | 31      | 2       | 1       | 0       |           |                               |      |
|                                                                                                                                     |                                                         | 3                                                       | Plain       | 0                                                                                                               | Inhib.  | 129     | 15      | 0       | 0       | 115,000   | 5.06                          |      |
|                                                                                                                                     |                                                         |                                                         | Charcoal    | 0                                                                                                               | +       | 166     | 23      | 0       | 0       |           |                               |      |
|                                                                                                                                     |                                                         | 4                                                       | Plain       | 0                                                                                                               | Inhib.  | ~600    | 54      | 3       | 0       | 375,000   | 5.57                          |      |
|                                                                                                                                     |                                                         |                                                         | Charcoal    | ++                                                                                                              | +       | ~1000   | 75      | 8       | 0       |           |                               |      |
|                                                                                                                                     |                                                         | 5                                                       | Plain       | 0                                                                                                               | Inhib.  | 6       | 0       | 0       | 0       | 4,000     | 3.60                          |      |
|                                                                                                                                     |                                                         |                                                         | Charcoal    | 0                                                                                                               | Inhib.  | 8       | 0       | 0       | 0       |           |                               |      |
|                                                                                                                                     |                                                         | Clofazimine B<br>Day 1 -<br>Week 4,<br>12.5 mg/kg daily | 1           | Plain                                                                                                           | 0       | Inhib.  | ~1000   | 116     | 4       | 1         | 900,000                       | 5.95 |
|                                                                                                                                     |                                                         |                                                         |             | Charcoal                                                                                                        | + / ++  | +       | ~1000   | ~200    | 18      | 1         |                               |      |
|                                                                                                                                     | 2                                                       |                                                         | Plain       | 0                                                                                                               | Inhib.  | 8       | 0       | 0       | 0       | 7,500     | 3.88                          |      |
|                                                                                                                                     |                                                         |                                                         | Charcoal    | 0                                                                                                               | ~160    | 15      | 0       | 0       | 0       |           |                               |      |
|                                                                                                                                     | 3                                                       |                                                         | Plain       | Inhib.                                                                                                          | ~350    | 130     | 11      | 1       | 0       | 55,000    | 4.74                          |      |
|                                                                                                                                     |                                                         |                                                         | Charcoal    | Contam.                                                                                                         | Contam. | Contam. | Contam. | Contam. | 0       |           |                               |      |
|                                                                                                                                     | 4                                                       |                                                         | Plain       | 0                                                                                                               | Inhib.  | 130     | 11      | 1       | 0       | 55,000    | 4.74                          |      |
|                                                                                                                                     |                                                         |                                                         | Charcoal    | Contam.                                                                                                         | Contam. | Contam. | Contam. | Contam. | 0       |           |                               |      |
|                                                                                                                                     | 5                                                       |                                                         | Plain       | 0                                                                                                               | ~500    | 119     | 21      | 3       | 0       | 175,000   | 5.24                          |      |
|                                                                                                                                     |                                                         |                                                         | Charcoal    | 0                                                                                                               | +       | ~200    | 35      | 2       | 0       |           |                               |      |
|                                                                                                                                     | Clofazimine C<br>Day 1 -<br>Week 4,<br>6.25 mg/kg daily | 1                                                       | Plain       | 0                                                                                                               | Inhib.  | 89      | 7       | 0       | 0       | 35,000    | 4.54                          |      |
|                                                                                                                                     |                                                         |                                                         | Charcoal    | +                                                                                                               | ~800    | ~120    | 5       | 0       | 0       |           |                               |      |
|                                                                                                                                     |                                                         | 2                                                       | Plain       | Inhib.                                                                                                          | ~1000   | 116     | 3       | 0       | 0       | 45,000    | 4.65                          |      |
|                                                                                                                                     |                                                         |                                                         | Charcoal    | Contam.                                                                                                         | Contam. | Contam. | 9       | 0       | 0       |           |                               |      |
| 3                                                                                                                                   |                                                         | Plain                                                   | 0           | +                                                                                                               | 147     | 13      | 0       | 0       | 65,000  | 4.81      |                               |      |
|                                                                                                                                     |                                                         | Charcoal                                                | Contam.     | +                                                                                                               | ~200    | 10      | 0       | 0       |         |           |                               |      |
| 4                                                                                                                                   |                                                         | Plain                                                   | 0           | Inhib.                                                                                                          | 45      | 3       | 0       | 0       | 15,000  | 4.18      |                               |      |
|                                                                                                                                     |                                                         | Charcoal                                                | Contam.     | Contam.                                                                                                         | Contam. | Contam. | 0       | 0       |         |           |                               |      |
| 5                                                                                                                                   |                                                         | Plain                                                   | 0           | Inhib.                                                                                                          | ~350    | 14      | 1       | 1       | 70,000  | 4.85      |                               |      |
|                                                                                                                                     |                                                         | Charcoal                                                | Contam.     | Contam.                                                                                                         | Contam. | Contam. | Contam. | 0       |         |           |                               |      |
| Clofazimine D<br>Day 1,<br>200 mg/kg;<br>Day 2,<br>100 mg/kg;<br>Days 3-14,<br>75 mg/kg daily;<br>Weeks 2-4,<br>25 mg/kg<br>3x/week | 1                                                       | Plain                                                   | 0           | 0                                                                                                               | 90      | 3       | 0       | 0       | 65,000  | 4.81      |                               |      |
|                                                                                                                                     |                                                         | Charcoal                                                | +           | ~500                                                                                                            | ~150    | 13      | 0       | 0       |         |           |                               |      |
|                                                                                                                                     | 2                                                       | Plain                                                   | 0           | 0                                                                                                               | 40      | 1       | 1       | 0       | 46,500  | 4.67      |                               |      |
|                                                                                                                                     |                                                         | Charcoal                                                | 0           | ~300                                                                                                            | 93      | 1       | 0       | 0       |         |           |                               |      |
|                                                                                                                                     | 3                                                       | Plain                                                   | 0           | Inhib.                                                                                                          | 153     | 6       | 0       | 0       | 145,000 | 5.16      |                               |      |
|                                                                                                                                     |                                                         | Charcoal                                                | ++          | +                                                                                                               | ~250    | 29      | 4       | 0       |         |           |                               |      |
|                                                                                                                                     | 4                                                       | Plain                                                   | 0           | 0                                                                                                               | 12      | 1       | 0       | 0       | 17,000  | 4.23      |                               |      |
|                                                                                                                                     |                                                         | Charcoal                                                | ~500        | ~300                                                                                                            | 34      | 4       | 0       | 0       |         |           |                               |      |
|                                                                                                                                     | 5                                                       | Plain                                                   | 0           | Inhib.                                                                                                          | ~300    | 29      | 1       | 0       | 465,000 | 5.67      |                               |      |
|                                                                                                                                     |                                                         | Charcoal                                                | 0           | +                                                                                                               | ~800    | 93      | 8       | 2       |         |           |                               |      |

**Table S1. Raw CFU count data from mouse lungs.**

| Time point         | Treatment group                                                                                                                        | Mouse    | Agar plates | Final (4-week) CFU counts for the following 10-fold dilutions:<br>(highlighted cell used to calculate CFU/lung) |         |       |         |    |         | CFU/lung  | Log <sub>10</sub><br>CFU/lung |
|--------------------|----------------------------------------------------------------------------------------------------------------------------------------|----------|-------------|-----------------------------------------------------------------------------------------------------------------|---------|-------|---------|----|---------|-----------|-------------------------------|
|                    |                                                                                                                                        |          |             | 0                                                                                                               | 1       | 2     | 3       | 4  | 5       |           |                               |
| Day 28<br>(Week 4) | Clofazimine E<br><br>Day 1,<br>100 mg/kg;<br>Day 2,<br>75 mg/kg;<br>Days 3-14,<br>50 mg/kg daily;<br>Weeks 2-4,<br>25 mg/kg<br>3x/week | 1        | Plain       | 0                                                                                                               | Inhib.  | 25    | 2       | 0  | 0       | 22,500    | 4.35                          |
|                    |                                                                                                                                        |          | Charcoal    | +                                                                                                               | ~500    | 45    | 3       | 0  | 0       |           |                               |
|                    |                                                                                                                                        | 2        | Plain       | 0                                                                                                               | Inhib.  | 132   | 9       | 0  | 0       | 90,000    | 4.95                          |
|                    |                                                                                                                                        |          | Charcoal    | ++                                                                                                              | +       | ~200  | 18      | 4  | 0       |           |                               |
|                    |                                                                                                                                        | 3        | Plain       | 0                                                                                                               | 103     | 33    | 2       | 0  | 0       | 36,000    | 4.56                          |
|                    |                                                                                                                                        |          | Charcoal    | +                                                                                                               | ~350    | 72    | 4       | 0  | 0       |           |                               |
|                    |                                                                                                                                        | 4        | Plain       | 0                                                                                                               | 34      | 29    | 1       | 0  | 0       | 15,000    | 4.18                          |
|                    |                                                                                                                                        |          | Charcoal    | +                                                                                                               | ~250    | 30    | Contam. | 0  | 0       |           |                               |
|                    |                                                                                                                                        | 5        | Plain       | 0                                                                                                               | Inhib.  | 41    | 4       | 0  | 0       | 28,000    | 4.45                          |
|                    |                                                                                                                                        |          | Charcoal    | +                                                                                                               | ~500    | 56    | 6       | 0  | 0       |           |                               |
|                    | Clofazimine F<br><br>Day 1,<br>50 mg/kg;<br>Days 2-14,<br>25 mg/kg daily;<br>Weeks 2-4,<br>25 mg/kg<br>3x/week                         | 1        | Plain       | 0                                                                                                               | ~200    | 45    | 2       | 0  | 0       | 35,000    | 4.54                          |
|                    |                                                                                                                                        |          | Charcoal    | +                                                                                                               | ~350    | 70    | 1       | 0  | 0       |           |                               |
|                    |                                                                                                                                        | 2        | Plain       | 0                                                                                                               | Inhib.  | 17    | 0       | 0  | 0       | 13,000    | 4.11                          |
|                    |                                                                                                                                        |          | Charcoal    | ~1000                                                                                                           | 144     | 26    | 1       | 0  | 0       |           |                               |
|                    |                                                                                                                                        | 3        | Plain       | 0                                                                                                               | Inhib.  | 26    | 1       | 0  | 0       | 18,500    | 4.27                          |
|                    |                                                                                                                                        |          | Charcoal    | 0                                                                                                               | 167     | 37    | 2       | 0  | 0       |           |                               |
|                    |                                                                                                                                        | 4        | Plain       | 0                                                                                                               | ~800    | ~300  | 13      | 0  | 0       | 145,000   | 5.16                          |
|                    |                                                                                                                                        |          | Charcoal    | ++                                                                                                              | +       | ~350  | 29      | 1  | 0       |           |                               |
| 5                  |                                                                                                                                        | Plain    | 0           | Inhib.                                                                                                          | 83      | 4     | 0       | 0  | 43,000  | 4.63      |                               |
|                    |                                                                                                                                        | Charcoal | +           | ~500                                                                                                            | 86      | 8     | 0       | 0  |         |           |                               |
| Day 56<br>(Week 8) | Untreated                                                                                                                              | 1        | Plain       | +++                                                                                                             | ++      | +     | ~700    | 70 | 5       | 4,750,000 | 6.68                          |
|                    |                                                                                                                                        |          | Charcoal    | ++                                                                                                              | ++      | +     | ~1000   | 95 | 5       |           |                               |
|                    |                                                                                                                                        | 2        | Plain       | 0                                                                                                               | +       | ~1000 | 75      | 9  | 0       | 450,000   | 5.65                          |
|                    |                                                                                                                                        |          | Charcoal    | Contam.                                                                                                         | +       | ~1000 | ~100    | 7  | 0       |           |                               |
|                    |                                                                                                                                        | 3        | Plain       | +++                                                                                                             | ++      | +     | ~400    | 40 | 0       | 2,500,000 | 6.40                          |
|                    |                                                                                                                                        |          | Charcoal    | +++                                                                                                             | ++      | +     | ~400    | 50 | 2       |           |                               |
|                    |                                                                                                                                        | 4        | Plain       | +++                                                                                                             | ++      | +     | ~800    | 80 | 6       | 4,000,000 | 6.60                          |
|                    |                                                                                                                                        |          | Charcoal    | +++                                                                                                             | ++      | +     | ~700    | 75 | 7       |           |                               |
|                    |                                                                                                                                        | 5        | Plain       | +++                                                                                                             | ++      | +     | 100     | 5  | 0       | 500,000   | 5.70                          |
|                    |                                                                                                                                        |          | Charcoal    | +++                                                                                                             | ++      | +     | ~100    | 10 | 0       |           |                               |
|                    | Clofazimine A<br><br>Day 1 -<br>Week 8,<br>25 mg/kg daily                                                                              | 1        | Plain       | 0                                                                                                               | 7       | 6     | 0       | 0  | 0       | 2,300     | 3.36                          |
|                    |                                                                                                                                        |          | Charcoal    | ~101                                                                                                            | 46      | 4     | 0       | 0  | 0       |           |                               |
|                    |                                                                                                                                        | 2        | Plain       | 0                                                                                                               | 20      | 29    | 0       | 0  | 0       | 22,000    | 4.34                          |
|                    |                                                                                                                                        |          | Charcoal    | +                                                                                                               | ~300    | 44    | 2       | 0  | 0       |           |                               |
|                    |                                                                                                                                        | 3        | Plain       | 0                                                                                                               | ~20     | ~150  | 20      | 0  | 0       | 100,000   | 5.00                          |
|                    |                                                                                                                                        |          | Charcoal    | ++                                                                                                              | +       | ~150  | 15      | 0  | 0       |           |                               |
|                    |                                                                                                                                        | 4        | Plain       | 0                                                                                                               | 0       | 0     | 0       | 0  | 0       | 500       | 2.70                          |
|                    |                                                                                                                                        |          | Charcoal    | 41                                                                                                              | Contam. | 1     | 1       | 0  | 0       |           |                               |
|                    |                                                                                                                                        | 5        | Plain       | 0                                                                                                               | 0       | 20    | 0       | 0  | 0       | 13,500    | 4.13                          |
|                    |                                                                                                                                        |          | Charcoal    | +                                                                                                               | ~135    | 27    | 1       | 0  | 0       |           |                               |
|                    | Clofazimine B<br><br>Day 1 -<br>Week 8,<br>12.5 mg/kg daily                                                                            | 1        | Plain       | 0                                                                                                               | 4       | 1     | 0       | 0  | 0       | 950       | 2.98                          |
|                    |                                                                                                                                        |          | Charcoal    | 94                                                                                                              | 19      | 1     | 0       | 0  | 0       |           |                               |
|                    |                                                                                                                                        | 2        | Plain       | 0                                                                                                               | 53      | 9     | 1       | 0  | 0       | 11,000    | 4.04                          |
|                    |                                                                                                                                        |          | Charcoal    | ~1000                                                                                                           | ~100    | 22    | 1       | 0  | 0       |           |                               |
| 3                  |                                                                                                                                        | Plain    | 0           | +                                                                                                               | ~100    | 9     | 0       | 0  | 140,000 | 5.15      |                               |
|                    |                                                                                                                                        | Charcoal | ++          | +                                                                                                               | Contam. | 28    | 2       | 0  |         |           |                               |

**Table S1. Raw CFU count data from mouse lungs.**

| Time point                                                                                                                         | Treatment group                                         | Mouse                                                                                                                               | Agar plates | Final (4-week) CFU counts for the following 10-fold dilutions:<br>(highlighted cell used to calculate CFU/lung) |       |         |      |    |        | CFU/lung | Log <sub>10</sub><br>CFU/lung |      |
|------------------------------------------------------------------------------------------------------------------------------------|---------------------------------------------------------|-------------------------------------------------------------------------------------------------------------------------------------|-------------|-----------------------------------------------------------------------------------------------------------------|-------|---------|------|----|--------|----------|-------------------------------|------|
|                                                                                                                                    |                                                         |                                                                                                                                     |             | 0                                                                                                               | 1     | 2       | 3    | 4  | 5      |          |                               |      |
| Day 56<br>(Week 8)                                                                                                                 | Clofazimine B                                           | 4                                                                                                                                   | Plain       | 0                                                                                                               | ~130  | 33      | 1    | 0  | 0      | 25,000   | 4.40                          |      |
|                                                                                                                                    |                                                         |                                                                                                                                     | Charcoal    | +                                                                                                               | ~200  | 50      | 2    | 0  | 0      |          |                               |      |
|                                                                                                                                    |                                                         | 5                                                                                                                                   | Plain       | 0                                                                                                               | 2     | 0       | 0    | 0  | 0      | 100      | 2.00                          |      |
|                                                                                                                                    |                                                         |                                                                                                                                     | Charcoal    | 4                                                                                                               | 1     | 0       | 0    | 0  | 0      |          |                               |      |
|                                                                                                                                    | Clofazimine C<br>Day 1 -<br>Week 8,<br>6.25 mg/kg daily | 1                                                                                                                                   | Plain       | 0                                                                                                               | 20    | 3       | 0    | 0  | 0      | 1,700    | 3.23                          |      |
|                                                                                                                                    |                                                         |                                                                                                                                     | Charcoal    | Contam.                                                                                                         | 34    | 4       | 0    | 0  | 0      |          |                               |      |
|                                                                                                                                    |                                                         | 2                                                                                                                                   | Plain       | 0                                                                                                               | ~1000 | 46      | 1    | 1  | 0      | 45,500   | 4.66                          |      |
|                                                                                                                                    |                                                         |                                                                                                                                     | Charcoal    | +                                                                                                               | ~1000 | 91      | 3    | 0  | 0      |          |                               |      |
|                                                                                                                                    |                                                         | 3                                                                                                                                   | Plain       | 0                                                                                                               | ~500  | 55      | 3    | 0  | 0      | 37,500   | 4.57                          |      |
|                                                                                                                                    |                                                         |                                                                                                                                     | Charcoal    | +                                                                                                               | ~100  | 75      | 5    | 0  | 0      |          |                               |      |
|                                                                                                                                    |                                                         | 4                                                                                                                                   | Plain       | 0                                                                                                               | ~100  | 20      | 3    | 0  | 0      | 17,500   | 4.24                          |      |
|                                                                                                                                    |                                                         |                                                                                                                                     | Charcoal    | +                                                                                                               | ~350  | 35      | 2    | 0  | 0      |          |                               |      |
|                                                                                                                                    |                                                         | 5                                                                                                                                   | Plain       | ++                                                                                                              | +     | ~500    | 23   | 2  | 0      | 270,000  | 5.43                          |      |
|                                                                                                                                    |                                                         |                                                                                                                                     | Charcoal    | ++                                                                                                              | +     | ~500    | 54   | 5  | 0      |          |                               |      |
|                                                                                                                                    |                                                         | Clofazimine D<br>Day 1,<br>200 mg/kg;<br>Day 2,<br>100 mg/kg;<br>Days 3-14,<br>75 mg/kg daily;<br>Weeks 2-8,<br>25 mg/kg<br>3x/week | 1           | Plain                                                                                                           | 0     | 8       | 2    | 0  | 0      | 0        | 1,000                         | 3.00 |
|                                                                                                                                    |                                                         |                                                                                                                                     |             | Charcoal                                                                                                        | 0     | Contam. | 2    | 0  | 0      | 0        |                               |      |
|                                                                                                                                    | 2                                                       |                                                                                                                                     | Plain       | 0                                                                                                               | 2     | 0       | 0    | 0  | 0      | 100      | 2.00                          |      |
|                                                                                                                                    |                                                         |                                                                                                                                     | Charcoal    | 22                                                                                                              | 1     | 0       | 0    | 0  | 0      |          |                               |      |
|                                                                                                                                    | 3                                                       |                                                                                                                                     | Plain       | 0                                                                                                               | 1     | 6       | 0    | 0  | 0      | 8,000    | 3.90                          |      |
|                                                                                                                                    |                                                         |                                                                                                                                     | Charcoal    | +                                                                                                               | 99    | 16      | 0    | 0  | 0      |          |                               |      |
|                                                                                                                                    | 4                                                       |                                                                                                                                     | Plain       | 0                                                                                                               | 26    | 7       | 0    | 0  | 0      | 5,500    | 3.74                          |      |
|                                                                                                                                    |                                                         |                                                                                                                                     | Charcoal    | +                                                                                                               | 77    | 11      | 0    | 0  | 0      |          |                               |      |
|                                                                                                                                    | 5                                                       |                                                                                                                                     | Plain       | 0                                                                                                               | 52    | 10      | 0    | 0  | 0      | 9,000    | 3.95                          |      |
|                                                                                                                                    |                                                         |                                                                                                                                     | Charcoal    | +                                                                                                               | ~120  | 18      | 3    | 0  | 0      |          |                               |      |
| Clofazimine E<br>Day 1,<br>100 mg/kg;<br>Day 2,<br>75 mg/kg;<br>Days 3-14,<br>50 mg/kg daily;<br>Weeks 2-8,<br>25 mg/kg<br>3x/week | 1                                                       | Plain                                                                                                                               | 0           | 56                                                                                                              | 26    | 0       | 0    | 0  | 21,500 | 4.33     |                               |      |
|                                                                                                                                    |                                                         | Charcoal                                                                                                                            | +           | ~500                                                                                                            | 43    | 0       | 0    | 0  |        |          |                               |      |
|                                                                                                                                    | 2                                                       | Plain                                                                                                                               | 0           | 45                                                                                                              | 12    | 1       | 0    | 0  | 12,000 | 4.08     |                               |      |
|                                                                                                                                    |                                                         | Charcoal                                                                                                                            | +           | ~250                                                                                                            | 24    | 0       | 0    | 0  |        |          |                               |      |
|                                                                                                                                    | 3                                                       | Plain                                                                                                                               | 0           | 134                                                                                                             | 48    | 0       | 0    | 0  | 49,000 | 4.69     |                               |      |
|                                                                                                                                    |                                                         | Charcoal                                                                                                                            | ++          | +                                                                                                               | 98    | 3       | 0    | 0  |        |          |                               |      |
|                                                                                                                                    | 4                                                       | Plain                                                                                                                               | 0           | ~100                                                                                                            | 34    | 2       | 0    | 0  | 22,000 | 4.34     |                               |      |
|                                                                                                                                    |                                                         | Charcoal                                                                                                                            | +           | ~400                                                                                                            | 44    | 0       | 0    | 0  |        |          |                               |      |
|                                                                                                                                    | 5                                                       | Plain                                                                                                                               | 0           | 26                                                                                                              | 5     | 0       | 0    | 0  | 6,500  | 3.81     |                               |      |
|                                                                                                                                    |                                                         | Charcoal                                                                                                                            | +           | ~180                                                                                                            | 13    | 0       | 0    | 0  |        |          |                               |      |
| Clofazimine F<br>Day 1,<br>50 mg/kg;<br>Days 2-14,<br>25 mg/kg daily;<br>Weeks 2-8,<br>25 mg/kg<br>3x/week                         | 1                                                       | Plain                                                                                                                               | 0           | 55                                                                                                              | 15    | 0       | 0    | 0  | 19,000 | 4.28     |                               |      |
|                                                                                                                                    |                                                         | Charcoal                                                                                                                            | 0           | ~300                                                                                                            | 38    | 1       | 0    | 0  |        |          |                               |      |
|                                                                                                                                    | 2                                                       | Plain                                                                                                                               | 0           | 55                                                                                                              | 10    | 1       | 0    | 0  | 11,500 | 4.06     |                               |      |
|                                                                                                                                    |                                                         | Charcoal                                                                                                                            | ~500        | ~200                                                                                                            | 23    | 1       | 0    | 0  |        |          |                               |      |
|                                                                                                                                    | 3                                                       | Plain                                                                                                                               | 0           | 2                                                                                                               | 1     | 0       | 0    | 0  | 1,450  | 3.16     |                               |      |
|                                                                                                                                    |                                                         | Charcoal                                                                                                                            | 84          | 29                                                                                                              | 2     | 0       | 0    | 0  |        |          |                               |      |
|                                                                                                                                    | 4                                                       | Plain                                                                                                                               | 0           | 10                                                                                                              | 10    | 0       | 0    | 0  | 5,000  | 3.70     |                               |      |
|                                                                                                                                    |                                                         | Charcoal                                                                                                                            | 172         | 43                                                                                                              | 6     | 1       | 0    | 0  |        |          |                               |      |
|                                                                                                                                    | 5                                                       | Plain                                                                                                                               | 0           | ~500                                                                                                            | 52    | 5       | 1    | 0  | 50,000 | 4.70     |                               |      |
|                                                                                                                                    |                                                         | Charcoal                                                                                                                            | +           | ~1000                                                                                                           | ~62   | 10      | 0    | 0  |        |          |                               |      |
| Day 84<br>(Week 12)                                                                                                                | Untreated                                               | 1                                                                                                                                   | Plain       | Inhib.                                                                                                          | +++   | +       | ~160 | 15 | 3      | 750,000  | 5.88                          |      |
|                                                                                                                                    |                                                         |                                                                                                                                     | Charcoal    | Inhib.                                                                                                          | +++   | +       | ~150 | 14 | 3      |          |                               |      |

**Table S1. Raw CFU count data from mouse lungs.**

| Time point                                                                                                                           | Treatment group                                        | Mouse    | Agar plates | Final (4-week) CFU counts for the following 10-fold dilutions:<br>(highlighted cell used to calculate CFU/lung) |          |          |      |    |        | CFU/lung  | Log <sub>10</sub><br>CFU/lung |
|--------------------------------------------------------------------------------------------------------------------------------------|--------------------------------------------------------|----------|-------------|-----------------------------------------------------------------------------------------------------------------|----------|----------|------|----|--------|-----------|-------------------------------|
|                                                                                                                                      |                                                        |          |             | 0                                                                                                               | 1        | 2        | 3    | 4  | 5      |           |                               |
| Day 84<br>(Week 12)                                                                                                                  | Untreated                                              | 2        | Plain       | +++                                                                                                             | +++      | + / ++   | ~300 | 37 | 3      | 2,400,000 | 6.38                          |
|                                                                                                                                      |                                                        |          | Charcoal    | +++                                                                                                             | +++      | + / ++   | ~400 | 48 | 6      |           |                               |
|                                                                                                                                      |                                                        | 3        | Plain       | Inhib.                                                                                                          | ++ / +++ | ++       | ~130 | 22 | 0      | 1,100,000 | 6.04                          |
|                                                                                                                                      |                                                        |          | Charcoal    | +++                                                                                                             | ++ / +++ | + / ++   | ~143 | 21 | 2      |           |                               |
|                                                                                                                                      |                                                        | 4        | Plain       | Inhib.                                                                                                          | ++ / +++ | + / ++   | ~119 | 5  | 0      | 800,000   | 5.90                          |
|                                                                                                                                      |                                                        |          | Charcoal    | +++                                                                                                             | ++ / +++ | + / ++   | ~205 | 16 | 1      |           |                               |
|                                                                                                                                      |                                                        | 5        | Plain       | +++                                                                                                             | +++      | ++ / +++ | +    | 53 | 5      | 4,150,000 | 6.62                          |
|                                                                                                                                      |                                                        |          | Charcoal    | +++                                                                                                             | +++      | ++ / +++ | +    | 83 | 9      |           |                               |
|                                                                                                                                      | Clofazimine A<br>Day 1 -<br>Week 12,<br>25 mg/kg daily | 1        | Plain       | 0                                                                                                               | 0        | 0        | 0    | 0  | 0      | 0         | 0.00                          |
|                                                                                                                                      |                                                        |          | Charcoal    | 0                                                                                                               | 0        | 0        | 0    | 0  | 0      |           |                               |
|                                                                                                                                      |                                                        | 2        | Plain       | 0                                                                                                               | 1        | 1        | 0    | 0  | 0      | 2,300     | 3.36                          |
|                                                                                                                                      |                                                        |          | Charcoal    | Inhib.                                                                                                          | 46       | 4        | 0    | 0  | 0      |           |                               |
|                                                                                                                                      |                                                        | 3        | Plain       | 0                                                                                                               | 0        | 0        | 0    | 0  | 0      | 650       | 2.81                          |
|                                                                                                                                      |                                                        |          | Charcoal    | Inhib.                                                                                                          | 13       | 1        | 0    | 0  | 0      |           |                               |
|                                                                                                                                      |                                                        | 4        | Plain       | 0                                                                                                               | 0        | 2        | 0    | 0  | 0      | 4,750     | 3.68                          |
|                                                                                                                                      |                                                        |          | Charcoal    | Inhib.                                                                                                          | 95       | 6        | 0    | 0  | 0      |           |                               |
| 5                                                                                                                                    |                                                        | Plain    | Inhib.      | 7                                                                                                               | 1        | 2        | 0    | 0  | 2,750  | 3.44      |                               |
|                                                                                                                                      |                                                        | Charcoal | 0           | 55                                                                                                              | 5        | 2        | 0    | 0  |        |           | 0                             |
| Clofazimine B<br>Day 1 -<br>Week 12,<br>12.5 mg/kg daily                                                                             | 1                                                      | Plain    | 0           | 3                                                                                                               | 1        | 0        | 0    | 0  | 300    | 2.48      |                               |
|                                                                                                                                      |                                                        | Charcoal | Inhib.      | 6                                                                                                               | 0        | 0        | 0    | 0  |        |           | 0                             |
|                                                                                                                                      | 2                                                      | Plain    | 0           | 0                                                                                                               | 5        | 0        | 0    | 0  | 2,500  | 3.40      |                               |
|                                                                                                                                      |                                                        | Charcoal | Contam.     | Contam.                                                                                                         | Contam.  | 1        | 0    | 0  |        |           | 0                             |
|                                                                                                                                      | 3                                                      | Plain    | Inhib.      | ~146                                                                                                            | 18       | 2        | 0    | 0  | 12,000 | 4.08      |                               |
|                                                                                                                                      |                                                        | Charcoal | +           | ~122                                                                                                            | 24       | 1        | 0    | 0  |        |           | 0                             |
|                                                                                                                                      | 4                                                      | Plain    | 0           | 15                                                                                                              | 2        | 0        | 0    | 0  | 1,400  | 3.15      |                               |
|                                                                                                                                      |                                                        | Charcoal | Contam.     | 28                                                                                                              | 3        | 0        | 0    | 0  |        |           | 0                             |
|                                                                                                                                      | 5                                                      | Plain    | 0           | 21                                                                                                              | 2        | 0        | 0    | 0  | 1,050  | 3.02      |                               |
|                                                                                                                                      |                                                        | Charcoal | Inhib.      | 21                                                                                                              | 3        | 0        | 0    | 0  |        |           | 0                             |
| Clofazimine C<br>Day 1 -<br>Week 12,<br>6.25 mg/kg daily                                                                             | 1                                                      | Plain    | 0           | 6                                                                                                               | 1        | 0        | 0    | 0  | 300    | 2.48      |                               |
|                                                                                                                                      |                                                        | Charcoal | ~50         | 5                                                                                                               | 0        | 0        | 0    | 0  |        |           | 0                             |
|                                                                                                                                      | 2                                                      | Plain    | 0           | 5                                                                                                               | 0        | 0        | 0    | 0  | 600    | 2.78      |                               |
|                                                                                                                                      |                                                        | Charcoal | ~250        | 12                                                                                                              | 1        | 0        | 0    | 0  |        |           | 0                             |
|                                                                                                                                      | 3                                                      | Plain    | Inhib.      | 35                                                                                                              | 5        | 0        | 0    | 0  | 1,750  | 3.24      |                               |
|                                                                                                                                      |                                                        | Charcoal | ~500        | 31                                                                                                              | 4        | 0        | 1    | 0  |        |           | 0                             |
|                                                                                                                                      | 4                                                      | Plain    | 0           | 7                                                                                                               | 3        | 0        | 0    | 0  | 500    | 2.70      |                               |
|                                                                                                                                      |                                                        | Charcoal | ~65         | 10                                                                                                              | 3        | 0        | 0    | 0  |        |           | 0                             |
|                                                                                                                                      | 5                                                      | Plain    | Inhib.      | +                                                                                                               | 24       | 1        | 0    | 0  | 14,500 | 4.16      |                               |
|                                                                                                                                      |                                                        | Charcoal | +           | +                                                                                                               | 29       | 0        | 0    | 0  |        |           | 0                             |
| Clofazimine D<br>Day 1,<br>200 mg/kg;<br>Day 2,<br>100 mg/kg;<br>Days 3-14,<br>75 mg/kg daily;<br>Weeks 2-12,<br>25 mg/kg<br>3x/week | 1                                                      | Plain    | 0           | 0                                                                                                               | 40       | 5        | 0    | 0  | 39,500 | 4.60      |                               |
|                                                                                                                                      |                                                        | Charcoal | +           | +                                                                                                               | 79       | 10       | 0    | 0  |        |           | 0                             |
|                                                                                                                                      | 2                                                      | Plain    | 0           | 29                                                                                                              | 13       | 3        | 0    | 0  | 15,000 | 4.18      |                               |
|                                                                                                                                      |                                                        | Charcoal | +           | ~208                                                                                                            | 30       | 1        | 0    | 0  |        |           | 0                             |
|                                                                                                                                      | 3                                                      | Plain    | 0           | 11                                                                                                              | 5        | 0        | 0    | 0  | 6,500  | 3.81      |                               |
|                                                                                                                                      |                                                        | Charcoal | +           | 96                                                                                                              | 13       | 2        | 0    | 0  |        |           | 0                             |
|                                                                                                                                      | 4                                                      | Plain    | 0           | 12                                                                                                              | 3        | 1        | 0    | 0  | 4,500  | 3.65      |                               |
|                                                                                                                                      |                                                        | Charcoal | +           | 38                                                                                                              | 9        | 0        | 0    | 0  |        |           | 0                             |

**Table S1. Raw CFU count data from mouse lungs.**

| Time point          | Treatment group                                                                                                                     | Mouse    | Agar plates | Final (4-week) CFU counts for the following 10-fold dilutions:<br>(highlighted cell used to calculate CFU/lung) |      |    |   |   |     | CFU/lung | Log <sub>10</sub><br>CFU/lung |
|---------------------|-------------------------------------------------------------------------------------------------------------------------------------|----------|-------------|-----------------------------------------------------------------------------------------------------------------|------|----|---|---|-----|----------|-------------------------------|
|                     |                                                                                                                                     |          |             | 0                                                                                                               | 1    | 2  | 3 | 4 | 5   |          |                               |
| Day 84<br>(Week 12) | Clofazimine D                                                                                                                       | 5        | Plain       | 0                                                                                                               | 3    | 1  | 0 | 0 | 0   | 500      | 2.70                          |
|                     |                                                                                                                                     |          | Charcoal    | 44                                                                                                              | 10   | 0  | 0 | 0 | 0   |          |                               |
|                     | Clofazimine E<br>Day 1,<br>100 mg/kg;<br>Day 2,<br>75 mg/kg;<br>Days 3-14,<br>50 mg/kg daily;<br>Weeks 2-12,<br>25 mg/kg<br>3x/week | 1        | Plain       | 0                                                                                                               | ~36  | 13 | 1 | 0 | 0   | 6,500    | 3.81                          |
|                     |                                                                                                                                     |          | Charcoal    | Contam.                                                                                                         | ~100 | 11 | 0 | 0 | 0   |          |                               |
|                     |                                                                                                                                     | 2        | Plain       | 0                                                                                                               | 22   | 16 | 1 | 0 | 0   | 12,000   | 4.08                          |
|                     |                                                                                                                                     |          | Charcoal    | +                                                                                                               | ~300 | 24 | 0 | 0 | 0   |          |                               |
|                     |                                                                                                                                     | 3        | Plain       | 0                                                                                                               | 0    | 0  | 0 | 0 | 0   | 150      | 2.18                          |
|                     |                                                                                                                                     |          | Charcoal    | Contam.                                                                                                         | 3    | 0  | 0 | 0 | 0   |          |                               |
|                     |                                                                                                                                     | 4        | Plain       | 0                                                                                                               | 21   | 4  | 0 | 0 | 0   | 3,800    | 3.58                          |
|                     |                                                                                                                                     |          | Charcoal    | +                                                                                                               | 76   | 5  | 0 | 0 | 0   |          |                               |
|                     |                                                                                                                                     | 5        | Plain       | 0                                                                                                               | 11   | 2  | 0 | 0 | 0   | 1,100    | 3.04                          |
|                     |                                                                                                                                     |          | Charcoal    | Contam.                                                                                                         | 22   | 1  | 0 | 0 | 0   |          |                               |
|                     | Clofazimine F<br>Day 1,<br>50 mg/kg;<br>Days 2-14,<br>25 mg/kg daily;<br>Weeks 2-12,<br>25 mg/kg<br>3x/week                         | 1        | Plain       | 0                                                                                                               | 132  | 28 | 3 | 0 | 0   | 14,000   | 4.15                          |
|                     |                                                                                                                                     |          | Charcoal    | +                                                                                                               | 181  | 23 | 1 | 1 | 0   |          |                               |
|                     |                                                                                                                                     | 2        | Plain       | 0                                                                                                               | 1    | 2  | 0 | 0 | 0   | 1,000    | 3.00                          |
|                     |                                                                                                                                     |          | Charcoal    | Inhib.                                                                                                          | 8    | 1  | 0 | 0 | 0   |          |                               |
|                     |                                                                                                                                     | 3        | Plain       | 0                                                                                                               | 2    | 2  | 0 | 0 | 0   | 700      | 2.85                          |
|                     |                                                                                                                                     |          | Charcoal    | Inhib.                                                                                                          | 14   | 0  | 0 | 0 | 0   |          |                               |
|                     |                                                                                                                                     | 4        | Plain       | 0                                                                                                               | 40   | 7  | 0 | 0 | 0   | 5,000    | 3.70                          |
|                     |                                                                                                                                     |          | Charcoal    | +                                                                                                               | 79   | 10 | 0 | 0 | 0   |          |                               |
| 5                   |                                                                                                                                     | Plain    | 0           | 0                                                                                                               | 1    | 0  | 0 | 0 | 750 | 2.88     |                               |
|                     |                                                                                                                                     | Charcoal | Inhib.      | 15                                                                                                              | 0    | 0  | 0 | 0 |     |          |                               |

<sup>1</sup>For plain plates, the neat (10<sup>0</sup> "dilution") CFU counts represent the average of 3 plates.

<sup>2</sup>For plain plates, the neat CFU counts represent the average of 2 plates.

+++ indicates uniform confluent growth.

++ indicates non-uniform confluent growth.

+ indicates individual colonies too numerous to accurately count or estimate.

~ indicates that an accurate CFU count could not be obtained due to some merged/touching colonies.

Blank cell, data not available.

Contam., contamination.

Inhib., visible growth inhibition.

Table S2. Raw CFU count data from mouse spleens.

| Time point | Treatment group                       | Mouse    | Agar plates | Final (4-week) CFU counts for the following 10-fold dilutions:<br>(highlighted cell used to calculate CFU/spleen) |         |         |    |         |         | CFU/spleen | Log <sub>10</sub><br>CFU/spleen |         |      |
|------------|---------------------------------------|----------|-------------|-------------------------------------------------------------------------------------------------------------------|---------|---------|----|---------|---------|------------|---------------------------------|---------|------|
|            |                                       |          |             | 0                                                                                                                 | 1       | 2       | 3  | 4       | 5       |            |                                 |         |      |
| Day 0      | Pre-treatment<br>(run 1)              | 1        | Plain       | +                                                                                                                 | ~500    | 33      | 3  | 0       | 0       | 23,500     | 4.37                            |         |      |
|            |                                       |          | Charcoal    | +                                                                                                                 | ~500    | 47      | 0  | 0       | 0       |            |                                 |         |      |
|            |                                       | 2        | Plain       | +                                                                                                                 | ~800    | 75      | 5  | 0       | 0       |            |                                 | 43,000  | 4.63 |
|            |                                       |          | Charcoal    | +                                                                                                                 | ~800    | 86      | 6  | 0       | 0       |            |                                 |         |      |
|            |                                       | 3        | Plain       | +                                                                                                                 | ~1500   | 147     | 20 | 0       | 0       |            |                                 | 100,000 | 5.00 |
|            |                                       |          | Charcoal    | +                                                                                                                 | ~1500   | ~150    | 11 | 0       | 0       |            |                                 |         |      |
|            | Pre-treatment<br>(run 2)              | 4        | Plain       | +                                                                                                                 | ~500    | 37      | 2  | 0       | 0       | 27,000     | 4.43                            |         |      |
|            |                                       |          | Charcoal    | +                                                                                                                 | ~500    | 54      | 3  | 0       | 0       |            |                                 |         |      |
|            |                                       | 5        | Plain       | +                                                                                                                 | ~1000   | ~150    | 15 | 2       | 0       | 75,000     | 4.88                            |         |      |
|            |                                       |          | Charcoal    | +                                                                                                                 | ~1000   | ~150    | 9  | 2       | 0       |            |                                 |         |      |
|            |                                       | 6        | Plain       | +                                                                                                                 | ~500    | 64      | 7  | 0       | 0       | 32,000     | 4.51                            |         |      |
|            |                                       |          | Charcoal    | +                                                                                                                 | ~500    |         | 4  | 0       | 0       |            |                                 |         |      |
|            | Pre-treatment<br>(run 3)              | 7        | Plain       | +                                                                                                                 | ~1000   | ~100    | 7  | 0       | 0       | 65,000     | 4.81                            |         |      |
|            |                                       |          | Charcoal    | +                                                                                                                 | ~1000   | ~150    | 13 | 0       | 0       |            |                                 |         |      |
|            |                                       | 8        | Plain       | +                                                                                                                 | ~1000   | ~100    | 9  | 0       | 0       | 50,000     | 4.70                            |         |      |
| Charcoal   |                                       |          | +           | ~1000                                                                                                             | ~100    | 10      | 0  | 0       |         |            |                                 |         |      |
| 9          |                                       | Plain    | +           | ~500                                                                                                              | 55      | 0       | 0  | 0       | 37,000  | 4.57       |                                 |         |      |
|            |                                       | Charcoal | +           | ~800                                                                                                              | 74      | 0       | 0  | 0       |         |            |                                 |         |      |
| Day 1      | Untreated                             | 1        | Plain       | +                                                                                                                 | ~500    | 21      | 5  | 1       | 0       | 21,000     | 4.32                            |         |      |
|            |                                       |          | Charcoal    | +                                                                                                                 | ~500    | 42      | 0  | 0       | 0       |            |                                 |         |      |
|            |                                       | 2        | Plain       | +                                                                                                                 | ~1000   | 55      | 8  | 0       | 0       | 27,500     | 4.44                            |         |      |
|            |                                       |          | Charcoal    | +                                                                                                                 | ~1000   | 95      | 3  | 1       | 0       |            |                                 |         |      |
|            |                                       | 3        | Plain       | +                                                                                                                 | ~800    | ~80     | 10 | 1       | 0       | 55,000     | 4.74                            |         |      |
|            |                                       |          | Charcoal    | +                                                                                                                 | ~800    | ~80     | 11 | 0       | 0       |            |                                 |         |      |
|            |                                       | 4        | Plain       | +/++                                                                                                              | +       |         | 22 | 2       | 0       | 110,000    | 5.04                            |         |      |
|            |                                       |          | Charcoal    | +/++                                                                                                              | +       | Contam. | 20 | 4       | Contam. |            |                                 |         |      |
|            |                                       | 5        | Plain       | +/++                                                                                                              | +       | 51      | 6  | 0       | 0       | 32,000     | 4.51                            |         |      |
|            |                                       |          | Charcoal    | +/++                                                                                                              | +       | 64      | 9  | 2       | 0       |            |                                 |         |      |
|            | Clofazimine A<br>Day 1,<br>25 mg/kg   | 1        | Plain       | +/++                                                                                                              | +       | 75      | 8  | 2       | 0       | 40,000     | 4.60                            |         |      |
|            |                                       |          | Charcoal    | +/++                                                                                                              | +       | 80      | 7  | Contam. | 0       |            |                                 |         |      |
|            |                                       | 2        | Plain       | +/++                                                                                                              | +       | 43      | 4  | 1       | 0       | 31,000     | 4.49                            |         |      |
|            |                                       |          | Charcoal    | +/++                                                                                                              | +       | 62      | 5  | 1       | 0       |            |                                 |         |      |
|            |                                       | 3        | Plain       | +/++                                                                                                              | +       | 29      | 5  | 1       | 0       | 28,000     | 4.45                            |         |      |
|            |                                       |          | Charcoal    | +/++                                                                                                              | +       | 56      | 4  | 2       | 0       |            |                                 |         |      |
|            |                                       | 4        | Plain       | +                                                                                                                 | 131     | 7       | 2  | 0       | 0       | 5,500      | 3.74                            |         |      |
|            |                                       |          | Charcoal    | +                                                                                                                 | ~120    | 11      | 1  | 0       | 0       |            |                                 |         |      |
|            |                                       | 5        | Plain       | +                                                                                                                 | ~250    | 22      | 5  | 0       | 0       | 16,500     | 4.22                            |         |      |
|            |                                       |          | Charcoal    | +                                                                                                                 | ~250    | 33      | 3  | 0       | 0       |            |                                 |         |      |
|            | Clofazimine B<br>Day 1,<br>12.5 mg/kg | 1        | Plain       | +/++                                                                                                              | +       | 57      | 10 | 0       | 0       | 42,000     | 4.62                            |         |      |
|            |                                       |          | Charcoal    | +/++                                                                                                              | +       | 84      | 6  | 0       | 0       |            |                                 |         |      |
|            |                                       | 2        | Plain       | +/++                                                                                                              | +       | 72      | 5  | 0       | 0       | 65,000     | 4.81                            |         |      |
|            |                                       |          | Charcoal    | +/++                                                                                                              | +       | 120     | 13 | 0       | 0       |            |                                 |         |      |
|            |                                       | 3        | Plain       | ++                                                                                                                | Contam. | ~200    | 38 | 2       | 0       | 190,000    | 5.28                            |         |      |
|            |                                       |          | Charcoal    | ++                                                                                                                | Contam. | ~200    | 28 | 0       | 0       |            |                                 |         |      |
|            |                                       | 4        | Plain       | +/++                                                                                                              | +       | ~200    | 22 | 0       | 0       | 110,000    | 5.04                            |         |      |
| Charcoal   |                                       |          | +/++        | +                                                                                                                 |         | 0       | 3  | 0       |         |            |                                 |         |      |

**Table S2. Raw CFU count data from mouse spleens.**

| Time point                          | Treatment group                       | Mouse                                | Agar plates | Final (4-week) CFU counts for the following 10-fold dilutions:<br>(highlighted cell used to calculate CFU/spleen) |      |         |         |         |        | CFU/spleen | Log <sub>10</sub><br>CFU/spleen |      |
|-------------------------------------|---------------------------------------|--------------------------------------|-------------|-------------------------------------------------------------------------------------------------------------------|------|---------|---------|---------|--------|------------|---------------------------------|------|
|                                     |                                       |                                      |             | 0                                                                                                                 | 1    | 2       | 3       | 4       | 5      |            |                                 |      |
| Day 1                               | Clofazimine B                         | 5                                    | Plain       | + / ++                                                                                                            | +    | 46      | 8       | Contam. | 0      | 43,000     | 4.63                            |      |
|                                     |                                       |                                      | Charcoal    | + / ++                                                                                                            | +    | 86      | 9       | 0       | 0      |            |                                 |      |
|                                     | Clofazimine C<br>Day 1,<br>6.25 mg/kg | 1                                    | Plain       | + / ++                                                                                                            | +    | ~70     | 11      | 0       | 0      | 55,000     | 4.74                            |      |
|                                     |                                       |                                      | Charcoal    | + / ++                                                                                                            | +    | ~100    | Contam. | 2       | 0      |            |                                 |      |
|                                     |                                       | 2                                    | Plain       | + / ++                                                                                                            | +    | 57      | 6       | 2       | 0      | 28,500     | 4.45                            |      |
|                                     |                                       |                                      | Charcoal    | + / ++                                                                                                            | +    | Contam. | 7       | 2       | 0      |            |                                 |      |
|                                     |                                       | 3                                    | Plain       | + / ++                                                                                                            | +    | ~75     | 6       | 1       | 0      | 30,000     | 4.48                            |      |
|                                     |                                       |                                      | Charcoal    | + / ++                                                                                                            | +    | ~85     | 0       | 0       | 0      |            |                                 |      |
|                                     |                                       | 4                                    | Plain       | +                                                                                                                 | ~200 | 18      | 6       | 0       | 0      | 12,500     | 4.10                            |      |
|                                     |                                       |                                      | Charcoal    | +                                                                                                                 | ~200 | 25      | 4       | 2       | 0      |            |                                 |      |
|                                     |                                       | 5                                    | Plain       | +                                                                                                                 | +    | 0       | 6       | 0       | 0      | 30,000     | 4.48                            |      |
|                                     |                                       |                                      | Charcoal    | +                                                                                                                 | +    | Contam. | 6       | 0       | 0      |            |                                 |      |
|                                     |                                       | Clofazimine D<br>Day 1,<br>200 mg/kg | 1           | Plain                                                                                                             | +    | ~250    | 75      | 3       | 0      | 0          | 42,000                          | 4.62 |
|                                     |                                       |                                      |             | Charcoal                                                                                                          | +    | ~300    | 84      | 11      | 2      | 0          |                                 |      |
|                                     | 2                                     |                                      | Plain       | +                                                                                                                 | ~150 | 20      | 1       | 0       | 0      | 14,000     | 4.15                            |      |
|                                     |                                       |                                      | Charcoal    | +                                                                                                                 | ~200 | 28      | 1       | 1       | 0      |            |                                 |      |
|                                     | 3                                     |                                      | Plain       | 0                                                                                                                 | ~400 | 51      | 13      | 1       | 0      | 27,000     | 4.43                            |      |
|                                     |                                       |                                      | Charcoal    | 0                                                                                                                 | ~400 | 54      | 5       | 1       | 0      |            |                                 |      |
|                                     | 4                                     |                                      | Plain       | +                                                                                                                 | ~200 | 35      | 3       | 0       | 1      | 32,000     | 4.51                            |      |
|                                     |                                       |                                      | Charcoal    | +                                                                                                                 | ~250 | 64      | 5       | 1       | 0      |            |                                 |      |
|                                     | 5                                     |                                      | Plain       | +                                                                                                                 | ~250 | 43      | 1       | 0       | 0      | 41,500     | 4.62                            |      |
|                                     |                                       |                                      | Charcoal    | +                                                                                                                 | ~300 | 83      | 6       | 1       | 0      |            |                                 |      |
|                                     | Clofazimine E<br>Day 1,<br>100 mg/kg  |                                      | 1           | Plain                                                                                                             | +    | +       | 15      | 1       | 0      | 0          | 14,500                          | 4.16 |
|                                     |                                       |                                      |             | Charcoal                                                                                                          | +    | +       | 29      | 1       | 1      | 0          |                                 |      |
|                                     |                                       | 2                                    | Plain       | +                                                                                                                 | +    | 23      | 0       | 0       | 0      | 20,500     | 4.31                            |      |
|                                     |                                       |                                      | Charcoal    | +                                                                                                                 | +    | 41      | 0       | 0       | 0      |            |                                 |      |
|                                     |                                       | 3                                    | Plain       | Contam.                                                                                                           | +    | 27      | 1       | 0       | 0      | 14,500     | 4.16                            |      |
|                                     |                                       |                                      | Charcoal    | Contam.                                                                                                           | +    | 29      | Contam. | 0       | 0      |            |                                 |      |
|                                     |                                       | 4                                    | Plain       | +                                                                                                                 | ~300 | 39      | 5       | 0       | 0      | 35,500     | 4.55                            |      |
|                                     |                                       |                                      | Charcoal    | +                                                                                                                 | ~350 | 71      | 6       | 0       | 0      |            |                                 |      |
| 5                                   |                                       | Plain                                | + / ++      | ~350                                                                                                              | 36   | 3       | 0       | 0       | 31,500 | 4.50       |                                 |      |
|                                     |                                       | Charcoal                             | + / ++      | ~400                                                                                                              | 63   | 5       | 0       | 0       |        |            |                                 |      |
| Clofazimine F<br>Day 1,<br>50 mg/kg |                                       | 1                                    | Plain       | +                                                                                                                 | ~150 | 34      | 2       | 0       | 0      | 23,000     | 4.36                            |      |
|                                     |                                       |                                      | Charcoal    | +                                                                                                                 | ~200 | 46      | 3       | Contam. | 0      |            |                                 |      |
|                                     | 2                                     | Plain                                | +           | ~150                                                                                                              | 17   | 0       | 0       | 0       | 16,500 | 4.22       |                                 |      |
|                                     |                                       | Charcoal                             | +           | ~200                                                                                                              | 33   | 3       | 0       | 0       |        |            |                                 |      |
|                                     | 3                                     | Plain                                | + / ++      | +                                                                                                                 | 55   | 5       | 0       | 0       | 30,000 | 4.48       |                                 |      |
|                                     |                                       | Charcoal                             | + / ++      | +                                                                                                                 | ~60  | 6       | 0       | 0       |        |            |                                 |      |
|                                     | 4                                     | Plain                                | + / ++      | +                                                                                                                 | 50   | 6       | 0       | 0       | 29,500 | 4.47       |                                 |      |
|                                     |                                       | Charcoal                             | + / ++      | +                                                                                                                 | 59   | 3       | 0       | 0       |        |            |                                 |      |
|                                     | 5                                     | Plain                                | + / ++      | +                                                                                                                 | ~60  | 8       | 1       | 0       | 50,000 | 4.70       |                                 |      |
|                                     |                                       | Charcoal                             | + / ++      | +                                                                                                                 | ~75  | 10      | 2       | 0       |        |            |                                 |      |
|                                     | Day 2                                 | Untreated                            | 1           | Plain                                                                                                             | ++   | +       | ~150    | 11      | 0      | 0          | 100,000                         | 5.00 |
|                                     |                                       |                                      |             | Charcoal                                                                                                          | ++   | +       | ~150    | 20      | 0      | 0          |                                 |      |
| 2                                   |                                       |                                      | Plain       | Contam.                                                                                                           | +    | ~125    | 11      | 2       | 0      | 170,000    | 5.23                            |      |
|                                     |                                       |                                      | Charcoal    | Contam.                                                                                                           | +    | ~300    | 34      | 2       | 0      |            |                                 |      |

**Table S2. Raw CFU count data from mouse spleens.**

| Time point                                                   | Treatment group                                | Mouse                                          | Agar plates | Final (4-week) CFU counts for the following 10-fold dilutions:<br>(highlighted cell used to calculate CFU/spleen) |         |      |         |   |        | CFU/spleen | Log <sub>10</sub><br>CFU/spleen |      |
|--------------------------------------------------------------|------------------------------------------------|------------------------------------------------|-------------|-------------------------------------------------------------------------------------------------------------------|---------|------|---------|---|--------|------------|---------------------------------|------|
|                                                              |                                                |                                                |             | 0                                                                                                                 | 1       | 2    | 3       | 4 | 5      |            |                                 |      |
| Day 2                                                        | Untreated                                      | 3                                              | Plain       | +                                                                                                                 | Contam. | ~150 | 8       | 1 | 0      | 95,000     | 4.98                            |      |
|                                                              |                                                |                                                | Charcoal    | +                                                                                                                 | Contam. | ~200 | 19      | 1 | 0      |            |                                 |      |
|                                                              |                                                | 4                                              | Plain       | +                                                                                                                 | ~500    | 36   | 3       | 0 | 0      | 30,000     | 4.48                            |      |
|                                                              |                                                |                                                | Charcoal    | +                                                                                                                 | ~500    | ~60  | 6       | 0 | 0      |            |                                 |      |
|                                                              |                                                | 5                                              | Plain       | +                                                                                                                 | ~500    | 26   | 5       | 0 | 0      | 18,500     | 4.27                            |      |
|                                                              |                                                |                                                | Charcoal    | +                                                                                                                 | ~300    | 37   | 6       | 0 | 0      |            |                                 |      |
|                                                              | Clofazimine A<br>Days 1-2,<br>25 mg/kg daily   | 1                                              | Plain       | +                                                                                                                 | ~500    | 23   | 5       | 0 | 0      | 25,000     | 4.40                            |      |
|                                                              |                                                |                                                | Charcoal    | +                                                                                                                 | ~500    | 50   | 7       | 2 | 0      |            |                                 |      |
|                                                              |                                                | 2                                              | Plain       | +                                                                                                                 | ~500    | 35   | 0       | 0 | 0      | 26,000     | 4.41                            |      |
|                                                              |                                                |                                                | Charcoal    | +                                                                                                                 | ~500    | 52   | 0       | 0 | 0      |            |                                 |      |
|                                                              |                                                | 3                                              | Plain       | +                                                                                                                 | ~200    | 25   | 6       | 0 | 0      | 20,000     | 4.30                            |      |
|                                                              |                                                |                                                | Charcoal    | +                                                                                                                 | ~360    | 40   | 4       | 1 | 0      |            |                                 |      |
|                                                              |                                                | 4                                              | Plain       | +                                                                                                                 | ~500    | 50   | 1       | 0 | 0      | 33,500     | 4.53                            |      |
|                                                              |                                                |                                                | Charcoal    | +                                                                                                                 | ~500    | 67   | 5       | 0 | 0      |            |                                 |      |
|                                                              |                                                | 5                                              | Plain       | +                                                                                                                 | ~500    | 62   | 9       | 1 | 0      | 46,500     | 4.67                            |      |
|                                                              |                                                |                                                | Charcoal    | +                                                                                                                 | ~500    | 93   | 11      | 2 | 0      |            |                                 |      |
|                                                              |                                                | Clofazimine B<br>Days 1-2,<br>12.5 mg/kg daily | 1           | Plain                                                                                                             | +       | ~500 | 46      | 1 | 1      | 0          | 27,000                          | 4.43 |
|                                                              |                                                |                                                |             | Charcoal                                                                                                          | +       | ~500 | 54      | 8 | 0      | 0          |                                 |      |
|                                                              | 2                                              |                                                | Plain       | +                                                                                                                 | ~1000   | 65   | 7       | 0 | 0      | 47,500     | 4.68                            |      |
|                                                              |                                                |                                                | Charcoal    | +                                                                                                                 | ~1000   | 95   | 14      | 0 | 0      |            |                                 |      |
|                                                              | 3                                              |                                                | Plain       | ++                                                                                                                | +       | 65   | 6       | 0 | 0      | 78,000     | 4.89                            |      |
|                                                              |                                                |                                                | Charcoal    | ++                                                                                                                | +       | 156  | Contam. | 0 | 0      |            |                                 |      |
|                                                              | 4                                              |                                                | Plain       | +                                                                                                                 | ~1000   | 93   | 4       | 0 | 0      | 46,500     | 4.67                            |      |
|                                                              |                                                |                                                | Charcoal    | +                                                                                                                 | ~1000   | 88   | 18      | 0 | 0      |            |                                 |      |
|                                                              | 5                                              |                                                | Plain       | +                                                                                                                 | ~300    | 31   | 1       | 0 | 0      | 30,000     | 4.48                            |      |
|                                                              |                                                |                                                | Charcoal    | +                                                                                                                 | ~300    | 60   | 3       | 0 | 0      |            |                                 |      |
|                                                              | Clofazimine C<br>Days 1-2,<br>6.25 mg/kg daily | 1                                              | Plain       | +                                                                                                                 | ~250    | 27   | 0       | 0 | 0      | 19,000     | 4.28                            |      |
|                                                              |                                                |                                                | Charcoal    | +                                                                                                                 | ~250    | 38   | 0       | 0 | 0      |            |                                 |      |
| 2                                                            |                                                | Plain                                          | Contam.     | ~200                                                                                                              | 21      | 2    | 0       | 0 | 10,500 | 4.02       |                                 |      |
|                                                              |                                                | Charcoal                                       | Contam.     | ~200                                                                                                              | 21      | 2    | 0       | 0 |        |            |                                 |      |
| 3                                                            |                                                | Plain                                          | +           | ~250                                                                                                              | 28      | 0    | 0       | 0 | 22,000 | 4.34       |                                 |      |
|                                                              |                                                | Charcoal                                       | +           | ~300                                                                                                              | 44      | 3    | 0       | 0 |        |            |                                 |      |
| 4                                                            |                                                | Plain                                          | +           | ~150                                                                                                              | 19      | 5    | 0       | 0 | 19,500 | 4.29       |                                 |      |
|                                                              |                                                | Charcoal                                       | +           | ~150                                                                                                              | 39      | 5    | 0       | 0 |        |            |                                 |      |
| 5                                                            |                                                | Plain                                          | +           | ~500                                                                                                              | 46      | 4    | 1       | 0 | 24,500 | 4.39       |                                 |      |
|                                                              |                                                | Charcoal                                       | +           | ~500                                                                                                              | 49      | 5    | 0       | 0 |        |            |                                 |      |
| Clofazimine D<br>Day 1,<br>200 mg/kg;<br>Day 2,<br>100 mg/kg | 1                                              | Plain                                          | 0           | Inhib.                                                                                                            | 11      | 1    | 0       | 0 | 5,500  | 3.74       |                                 |      |
|                                                              |                                                | Charcoal                                       | 0           | ~100                                                                                                              | 11      | 1    | 0       | 0 |        |            |                                 |      |
|                                                              | 2                                              | Plain                                          | ++          | +                                                                                                                 | ~100    | 8    | 2       | 0 | 80,000 | 4.90       |                                 |      |
|                                                              |                                                | Charcoal                                       | ++          | +                                                                                                                 | ~100    | 16   | 2       | 0 |        |            |                                 |      |
|                                                              | 3                                              | Plain                                          | +           | ~100                                                                                                              | 8       | 0    | 0       | 0 | 15,000 | 4.18       |                                 |      |
|                                                              |                                                | Charcoal                                       | +           | ~200                                                                                                              | 30      | 0    | 0       | 0 |        |            |                                 |      |
|                                                              | 4                                              | Plain                                          | 0           | ~500                                                                                                              | 33      | 1    | 0       | 0 | 30,500 | 4.48       |                                 |      |
|                                                              |                                                | Charcoal                                       | +           | ~500                                                                                                              | 61      | 4    | 2       | 0 |        |            |                                 |      |
|                                                              | 5                                              | Plain                                          | +           | ~500                                                                                                              | 25      | 2    | 0       | 0 | 18,000 | 4.26       |                                 |      |
|                                                              |                                                | Charcoal                                       | +           | ~500                                                                                                              | 36      | 7    | 0       | 0 |        |            |                                 |      |



**Table S2. Raw CFU count data from mouse spleens.**

| Time point        | Treatment group                                             | Mouse    | Agar plates | Final (4-week) CFU counts for the following 10-fold dilutions:<br>(highlighted cell used to calculate CFU/spleen) |       |      |    |   |         | CFU/spleen | Log <sub>10</sub><br>CFU/spleen |
|-------------------|-------------------------------------------------------------|----------|-------------|-------------------------------------------------------------------------------------------------------------------|-------|------|----|---|---------|------------|---------------------------------|
|                   |                                                             |          |             | 0                                                                                                                 | 1     | 2    | 3  | 4 | 5       |            |                                 |
| Day 2             | Clofazimine E<br>Day 1,<br>100 mg/kg;<br>Day 2,<br>75 mg/kg | 1        | Plain       | +                                                                                                                 | ~200  | 27   | 2  | 0 | 0       | 29,500     | 4.47                            |
|                   |                                                             |          | Charcoal    | +                                                                                                                 | ~200  | 59   | 2  | 0 | 0       |            |                                 |
|                   |                                                             | 2        | Plain       | 0                                                                                                                 | +     | ~100 | 8  | 0 | 0       | 55,000     | 4.74                            |
|                   |                                                             |          | Charcoal    | ++                                                                                                                | +     | ~150 | 11 | 0 | 0       |            |                                 |
|                   |                                                             | 3        | Plain       | 0                                                                                                                 | ~500  | 46   | 7  | 1 | 0       | 35,000     | 4.54                            |
|                   |                                                             |          | Charcoal    | Inhib.                                                                                                            | ~500  | 70   | 7  | 1 | 0       |            |                                 |
|                   |                                                             | 4        | Plain       | 0                                                                                                                 | 96    | 8    | 0  | 0 | 0       | 14,000     | 4.15                            |
|                   |                                                             |          | Charcoal    | Inhib.                                                                                                            | ~200  | 28   | 2  | 0 | 0       |            |                                 |
|                   |                                                             | 5        | Plain       | +                                                                                                                 | ~250  | 33   | 5  | 2 | 0       | 35,500     | 4.55                            |
|                   |                                                             |          | Charcoal    | +                                                                                                                 | ~500  | 71   | 8  | 1 | 0       |            |                                 |
|                   | Clofazimine F<br>Day 1,<br>50 mg/kg;<br>Day 2,<br>25 mg/kg  | 1        | Plain       | +                                                                                                                 | ~500  | 55   | 4  | 1 | 0       | 31,000     | 4.49                            |
|                   |                                                             |          | Charcoal    | +                                                                                                                 | ~500  | 62   | 6  | 1 | 0       |            |                                 |
|                   |                                                             | 2        | Plain       | ++                                                                                                                | +     | 95   | 13 | 2 | 0       | 115,000    | 5.06                            |
|                   |                                                             |          | Charcoal    | ++                                                                                                                | +     | ~100 | 23 | 0 | 0       |            |                                 |
|                   |                                                             | 3        | Plain       | +                                                                                                                 | ~500  | 29   | 0  | 0 | 0       | 24,000     | 4.38                            |
|                   |                                                             |          | Charcoal    | +                                                                                                                 | ~500  | 48   | 2  | 0 | 0       |            |                                 |
|                   |                                                             | 4        | Plain       | Inhib.                                                                                                            | +     | 36   | 5  | 0 | 0       | 18,000     | 4.26                            |
|                   |                                                             |          | Charcoal    | ++                                                                                                                | +     | 25   | 7  | 0 | 0       |            |                                 |
| 5                 |                                                             | Plain    | ++          | +                                                                                                                 | ~100  | 16   | 0  | 0 | 125,000 | 5.10       |                                 |
|                   |                                                             | Charcoal | ++          | +                                                                                                                 | ~100  | 25   | 0  | 0 |         |            |                                 |
| Day 7<br>(Week 1) | Untreated                                                   | 1        | Plain       | +                                                                                                                 | ~500  | 47   | 2  | 0 | 0       | 32,000     | 4.51                            |
|                   |                                                             |          | Charcoal    | +                                                                                                                 | ~500  | 64   | 4  | 0 | 0       |            |                                 |
|                   |                                                             | 2        | Plain       | +                                                                                                                 | ~500  | 53   | 4  | 0 | 0       | 26,500     | 4.42                            |
|                   |                                                             |          | Charcoal    | +                                                                                                                 | ~500  | 39   | 7  | 0 | 0       |            |                                 |
|                   |                                                             | 3        | Plain       | +                                                                                                                 | ~500  | 26   | 3  | 0 | 0       | 23,000     | 4.36                            |
|                   |                                                             |          | Charcoal    | +                                                                                                                 | ~500  | 46   | 0  | 0 | 0       |            |                                 |
|                   |                                                             | 4        | Plain       | ++                                                                                                                | +     | ~500 | 46 | 4 | 0       | 300,000    | 5.48                            |
|                   |                                                             |          | Charcoal    | ++                                                                                                                | +     | ~500 | 60 | 6 | 0       |            |                                 |
|                   |                                                             | 5        | Plain       | +                                                                                                                 | ~500  | 43   | 3  | 0 | 0       | 27,500     | 4.44                            |
|                   |                                                             |          | Charcoal    | +                                                                                                                 | ~500  | 55   | 7  | 0 | 0       |            |                                 |
|                   | Clofazimine A<br>Days 1-7,<br>25 mg/kg daily                | 1        | Plain       | +                                                                                                                 | ~150  | 31   | 2  | 0 | 0       | 15,500     | 4.19                            |
|                   |                                                             |          | Charcoal    | +                                                                                                                 | ~200  | 16   | 5  | 0 | 0       |            |                                 |
|                   |                                                             | 2        | Plain       | +                                                                                                                 | ~120  | 23   | 2  | 0 | 0       | 13,000     | 4.11                            |
|                   |                                                             |          | Charcoal    | +                                                                                                                 | ~250  | 26   | 3  | 0 | 0       |            |                                 |
|                   |                                                             | 3        | Plain       | 0                                                                                                                 | ~500  | 42   | 5  | 0 | 0       | 44,000     | 4.64                            |
|                   |                                                             |          | Charcoal    | Inhib.                                                                                                            | ~1000 | 88   | 8  | 0 | 0       |            |                                 |
|                   |                                                             | 4        | Plain       | ~100                                                                                                              | 27    | 2    | 0  | 0 | 0       | 3,000      | 3.48                            |
|                   |                                                             |          | Charcoal    | ~500                                                                                                              | 45    | 6    | 0  | 0 | 0       |            |                                 |
|                   |                                                             | 5        | Plain       | Inhib.                                                                                                            | 90    | 13   | 0  | 0 | 0       | 6,500      | 3.81                            |
|                   |                                                             |          | Charcoal    | ~1000                                                                                                             | ~100  | 10   | 0  | 0 | 0       |            |                                 |
|                   | Clofazimine B<br>Days 1-7,<br>12.5 mg/kg daily              | 1        | Plain       | ~1000                                                                                                             | 150   | 15   | 0  | 0 | 0       | 10,500     | 4.02                            |
|                   |                                                             |          | Charcoal    | ~1000                                                                                                             | ~200  | 21   | 3  | 0 | 0       |            |                                 |
|                   |                                                             | 2        | Plain       | Inhib.                                                                                                            | 74    | 9    | 0  | 0 | 0       | 8,500      | 3.93                            |
|                   |                                                             |          | Charcoal    | ~1000                                                                                                             | ~150  | 17   | 1  | 0 | 0       |            |                                 |
| 3                 |                                                             | Plain    | 0           | 98                                                                                                                | 8     | 1    | 0  | 0 | 9,000   | 3.95       |                                 |
|                   |                                                             | Charcoal | 0           | 75                                                                                                                | 18    | 2    | 0  | 0 |         |            |                                 |

**Table S2. Raw CFU count data from mouse spleens.**

| Time point                                                                                  | Treatment group                                | Mouse                                                                                        | Agar plates | Final (4-week) CFU counts for the following 10-fold dilutions:<br>(highlighted cell used to calculate CFU/spleen) |         |         |         |         |        | CFU/spleen | Log <sub>10</sub><br>CFU/spleen |      |
|---------------------------------------------------------------------------------------------|------------------------------------------------|----------------------------------------------------------------------------------------------|-------------|-------------------------------------------------------------------------------------------------------------------|---------|---------|---------|---------|--------|------------|---------------------------------|------|
|                                                                                             |                                                |                                                                                              |             | 0                                                                                                                 | 1       | 2       | 3       | 4       | 5      |            |                                 |      |
| Day 7<br>(Week 1)                                                                           | Clofazimine B                                  | 4                                                                                            | Plain       | ~1000                                                                                                             | 83      | 16      | 2       | 0       | 0      | 8,500      | 3.93                            |      |
|                                                                                             |                                                |                                                                                              | Charcoal    | ~2000                                                                                                             | ~150    | 17      | 1       | 0       | 0      |            |                                 |      |
|                                                                                             |                                                | 5                                                                                            | Plain       | Inhib.                                                                                                            | 51      | 3       | 0       | 0       | 0      | 3,500      | 3.54                            |      |
|                                                                                             |                                                |                                                                                              | Charcoal    | ~1000                                                                                                             | 63      | 7       | 0       | 0       | 0      |            |                                 |      |
|                                                                                             | Clofazimine C<br>Days 1-7,<br>6.25 mg/kg daily | 1                                                                                            | Plain       | ~1000                                                                                                             | 102     | 9       | 0       | 0       | 0      | 9,500      | 3.98                            |      |
|                                                                                             |                                                |                                                                                              | Charcoal    | ~1000                                                                                                             | ~250    | 19      | 1       | 0       | 0      |            |                                 |      |
|                                                                                             |                                                | 2                                                                                            | Plain       | +                                                                                                                 | ~260    | ~20     | 4       | 0       | 0      | 20,000     | 4.30                            |      |
|                                                                                             |                                                |                                                                                              | Charcoal    | +                                                                                                                 | ~300    | Contam. | 4       | 1       | 0      |            |                                 |      |
|                                                                                             |                                                | 3                                                                                            | Plain       | +                                                                                                                 | ~500    | 45      | 6       | 0       | 0      | 35,500     | 4.55                            |      |
|                                                                                             |                                                |                                                                                              | Charcoal    | +                                                                                                                 | ~500    | 71      | 9       | 1       | 0      |            |                                 |      |
|                                                                                             |                                                | 4                                                                                            | Plain       | ++                                                                                                                | +       | ~150    | 20      | 2       | 0      | 130,000    | 5.11                            |      |
|                                                                                             |                                                |                                                                                              | Charcoal    | ++                                                                                                                | +       | ~200    | 26      | 1       | 0      |            |                                 |      |
|                                                                                             |                                                | 5                                                                                            | Plain       | ~1000                                                                                                             | 95      | 10      | 2       | 0       | 0      | 7,500      | 3.88                            |      |
|                                                                                             |                                                |                                                                                              | Charcoal    | ~1000                                                                                                             | ~200    | 15      | 2       | 0       | 0      |            |                                 |      |
|                                                                                             |                                                | Clofazimine D<br>Day 1,<br>200 mg/kg;<br>Day 2,<br>100 mg/kg;<br>Days 3-7,<br>75 mg/kg daily | 1           | Plain                                                                                                             | Inhib.  | ~150    | 15      | 0       | 0      | 0          | 15,500                          | 4.19 |
|                                                                                             |                                                |                                                                                              |             | Charcoal                                                                                                          | +       | ~150    | 31      | 0       | 0      | 0          |                                 |      |
|                                                                                             | 2                                              |                                                                                              | Plain       | 0                                                                                                                 | 29      | 4       | 0       | 0       | 0      | 3,000      | 3.48                            |      |
|                                                                                             |                                                |                                                                                              | Charcoal    | ~500                                                                                                              | 64      | 6       | 0       | 0       | 0      |            |                                 |      |
|                                                                                             | 3                                              |                                                                                              | Plain       | 0                                                                                                                 | ~200    | 22      | 2       | 0       | 0      | 12,000     | 4.08                            |      |
|                                                                                             |                                                |                                                                                              | Charcoal    | +                                                                                                                 | ~250    | 24      | 1       | 0       | 0      |            |                                 |      |
|                                                                                             | 4                                              |                                                                                              | Plain       | 0                                                                                                                 | 24      | 2       | 2       | 0       | 0      | 3,000      | 3.48                            |      |
|                                                                                             |                                                |                                                                                              | Charcoal    | 0                                                                                                                 | 45      | 6       | 0       | 0       | 0      |            |                                 |      |
|                                                                                             | 5                                              |                                                                                              | Plain       | ~100                                                                                                              | ~100    | 15      | 2       | 0       | 0      | 7,500      | 3.88                            |      |
|                                                                                             |                                                |                                                                                              | Charcoal    | +                                                                                                                 | Contam. | Contam. | 0       | 0       | 0      |            |                                 |      |
| Clofazimine E<br>Day 1,<br>100 mg/kg;<br>Day 2,<br>75 mg/kg;<br>Days 3-7,<br>50 mg/kg daily | 1                                              | Plain                                                                                        | 0           | 60                                                                                                                | 12      | 1       | 0       | 0       | 7,000  | 3.85       |                                 |      |
|                                                                                             |                                                | Charcoal                                                                                     | ~1000       | ~140                                                                                                              | 14      | 2       | 0       | 0       |        |            |                                 |      |
|                                                                                             | 2                                              | Plain                                                                                        | 0           | 66                                                                                                                | 4       | 1       | 0       | 0       | 8,500  | 3.93       |                                 |      |
|                                                                                             |                                                | Charcoal                                                                                     | ~1000       | 88                                                                                                                | 17      | 2       | 0       | 0       |        |            |                                 |      |
|                                                                                             | 3                                              | Plain                                                                                        | 0           | ~160                                                                                                              | 35      | 5       | 0       | 0       | 17,500 | 4.24       |                                 |      |
|                                                                                             |                                                | Charcoal                                                                                     | +           | ~200                                                                                                              | 28      | 4       | 0       | 0       |        |            |                                 |      |
|                                                                                             | 4                                              | Plain                                                                                        | 0           | ~100                                                                                                              | 16      | 0       | 0       | 0       | 8,000  | 3.90       |                                 |      |
|                                                                                             |                                                | Charcoal                                                                                     | ~1000       | ~100                                                                                                              | 7       | 2       | 0       | 0       |        |            |                                 |      |
|                                                                                             | 5                                              | Plain                                                                                        | ~1000       | ~200                                                                                                              | 23      | 5       | 0       | 0       | 17,000 | 4.23       |                                 |      |
|                                                                                             |                                                | Charcoal                                                                                     | +           | ~200                                                                                                              | 34      | 2       | 0       | 0       |        |            |                                 |      |
| Clofazimine F<br>Day 1,<br>50 mg/kg;<br>Days 2-7,<br>25 mg/kg daily                         | 1                                              | Plain                                                                                        | Inhib.      | Inhib.                                                                                                            | 12      | 1       | 0       | 0       | 15,500 | 4.19       |                                 |      |
|                                                                                             |                                                | Charcoal                                                                                     | +           | ~250                                                                                                              | 31      | Contam. | Contam. | Contam. |        |            |                                 |      |
|                                                                                             | 2                                              | Plain                                                                                        | Inhib.      | Inhib.                                                                                                            | 19      | 1       | 0       | 0       | 9,500  | 3.98       |                                 |      |
|                                                                                             |                                                | Charcoal                                                                                     | Inhib.      | Contam.                                                                                                           | Contam. | Contam. | Contam. | Contam. |        |            |                                 |      |
|                                                                                             | 3                                              | Plain                                                                                        | Inhib.      | 82                                                                                                                | 4       | 1       | 0       | 0       | 5,400  | 3.73       |                                 |      |
|                                                                                             |                                                | Charcoal                                                                                     | Inhib.      | 108                                                                                                               | Contam. | Contam. | Contam. | Contam. |        |            |                                 |      |
|                                                                                             | 4                                              | Plain                                                                                        | Inhib.      | Inhib.                                                                                                            | 3       | 0       | 0       | 0       | 6,350  | 3.80       |                                 |      |
|                                                                                             |                                                | Charcoal                                                                                     | Inhib.      | 127                                                                                                               | Contam. | Contam. | 0       | Contam. |        |            |                                 |      |
|                                                                                             | 5                                              | Plain                                                                                        | Inhib.      | 128                                                                                                               | 9       | 4       | 0       | 0       | 7,500  | 3.88       |                                 |      |
|                                                                                             |                                                | Charcoal                                                                                     | Inhib.      | Inhib.                                                                                                            | 15      | 5       | Contam. | 0       |        |            |                                 |      |
| Day 14<br>(Week 2)                                                                          | Untreated                                      | 1                                                                                            | Plain       | +                                                                                                                 | 181     | 21      | 3       | 0       | 0      | 17,500     | 4.24                            |      |
|                                                                                             |                                                |                                                                                              | Charcoal    | ++                                                                                                                | ~420    | 35      | 2       | 2       | 0      |            |                                 |      |

**Table S2. Raw CFU count data from mouse spleens.**

| Time point                                                                                    | Treatment group                                 | Mouse                                         | Agar plates | Final (4-week) CFU counts for the following 10-fold dilutions:<br>(highlighted cell used to calculate CFU/spleen) |         |         |         |         |         | CFU/spleen | Log <sub>10</sub><br>CFU/spleen |      |
|-----------------------------------------------------------------------------------------------|-------------------------------------------------|-----------------------------------------------|-------------|-------------------------------------------------------------------------------------------------------------------|---------|---------|---------|---------|---------|------------|---------------------------------|------|
|                                                                                               |                                                 |                                               |             | 0                                                                                                                 | 1       | 2       | 3       | 4       | 5       |            |                                 |      |
| Day 14<br>(Week 2)                                                                            | Untreated                                       | 2                                             | Plain       | ++                                                                                                                | +       | 21      | 0       | 1       | 0       | 10,500     | 4.02                            |      |
|                                                                                               |                                                 |                                               | Charcoal    | ++                                                                                                                | +       | 19      | 4       | 0       | 0       |            |                                 |      |
|                                                                                               |                                                 | 3                                             | Plain       | ++                                                                                                                | ~500    | 23      | 0       | 0       | 0       | 22,500     | 4.35                            |      |
|                                                                                               |                                                 |                                               | Charcoal    | +                                                                                                                 | ~450    | 45      | 1       | 0       | 0       |            |                                 |      |
|                                                                                               |                                                 | 4                                             | Plain       | ++                                                                                                                | +       | ~1000   | 23      | 3       | 0       | 135,000    | 5.13                            |      |
|                                                                                               |                                                 |                                               | Charcoal    | +++                                                                                                               | +       | ~1000   | 27      | 3       | 0       |            |                                 |      |
|                                                                                               |                                                 | 5                                             | Plain       | +                                                                                                                 | ~400    | 63      | 6       | 0       | 0       | 39,000     | 4.59                            |      |
|                                                                                               |                                                 |                                               | Charcoal    | +                                                                                                                 | ~1000   | 78      | 5       | 1       | 0       |            |                                 |      |
|                                                                                               |                                                 | Clofazimine A<br>Days 1-14,<br>25 mg/kg daily | 1           | Plain                                                                                                             | +       | 33      | 1       | 0       | 0       | 0          | 1,650                           | 3.22 |
|                                                                                               |                                                 |                                               |             | Charcoal                                                                                                          | Contam. | Contam. | 0       | 0       | 0       | 0          |                                 |      |
|                                                                                               | 2                                               |                                               | Plain       | Inhib.                                                                                                            | 89      | Contam. | Contam. | 0       | 0       | 4,450      | 3.65                            |      |
|                                                                                               |                                                 |                                               | Charcoal    | Contam.                                                                                                           | Contam. | Contam. | Contam. | Contam. | Contam. |            |                                 |      |
|                                                                                               | 3                                               |                                               | Plain       | Inhib.                                                                                                            | 108     | 8       | 1       | 0       | 0       | 4,000      | 3.60                            |      |
|                                                                                               |                                                 |                                               | Charcoal    | Contam.                                                                                                           | Contam. | Contam. | Contam. | Contam. | Contam. |            |                                 |      |
|                                                                                               | 4                                               |                                               | Plain       | Inhib.                                                                                                            | 55      | 6       | 1       | 0       | 0       | 3,000      | 3.48                            |      |
|                                                                                               |                                                 |                                               | Charcoal    | Contam.                                                                                                           | Contam. | Contam. | Contam. | Contam. | Contam. |            |                                 |      |
|                                                                                               | 5                                               |                                               | Plain       | 0                                                                                                                 | 20      | 1       | 0       | 0       | 0       | 1,000      | 3.00                            |      |
|                                                                                               |                                                 |                                               | Charcoal    | Contam.                                                                                                           | Contam. | Contam. | Contam. | Contam. | Contam. |            |                                 |      |
|                                                                                               | Clofazimine B<br>Days 1-14,<br>12.5 mg/kg daily | 1                                             | Plain       | ~200                                                                                                              | 39      | 2       | 0       | 0       | 0       | 2,700      | 3.43                            |      |
|                                                                                               |                                                 |                                               | Charcoal    | Contam.                                                                                                           | 54      | 5       | 3       | 0       | 0       |            |                                 |      |
|                                                                                               |                                                 | 2                                             | Plain       | ~200                                                                                                              | 40      | 1       | 1       | 0       | 0       | 2,000      | 3.30                            |      |
|                                                                                               |                                                 |                                               | Charcoal    | ~300                                                                                                              | 20      | 4       | 1       | 0       | 0       |            |                                 |      |
|                                                                                               |                                                 | 3                                             | Plain       | ~200                                                                                                              | 54      | 6       | 1       | 0       | 0       | 6,000      | 3.78                            |      |
|                                                                                               |                                                 |                                               | Charcoal    | ~200                                                                                                              | 70      | 12      | 1       | 0       | 0       |            |                                 |      |
| 4                                                                                             |                                                 | Plain                                         | 21          | 6                                                                                                                 | 1       | 0       | 0       | 0       | 400     | 2.60       |                                 |      |
|                                                                                               |                                                 | Charcoal                                      | 158         | 8                                                                                                                 | 1       | 0       | 0       | 0       |         |            |                                 |      |
| 5                                                                                             |                                                 | Plain                                         | ~320        | 30                                                                                                                | 4       | 0       | 0       | 0       | 3,000   | 3.48       |                                 |      |
|                                                                                               |                                                 | Charcoal                                      | ~1000       | 60                                                                                                                | 2       | 1       | 0       | 0       |         |            |                                 |      |
| Clofazimine C<br>Days 1-14,<br>6.25 mg/kg daily                                               | 1                                               | Plain                                         | +           | 50                                                                                                                | 4       | 0       | 0       | 0       | 2,500   | 3.40       |                                 |      |
|                                                                                               |                                                 | Charcoal                                      | Contam.     | Contam.                                                                                                           | Contam. | Contam. | Contam. | Contam. |         |            |                                 |      |
|                                                                                               | 2                                               | Plain                                         | Inhib.      | 48                                                                                                                | 4       | 0       | 0       | 0       | 2,400   | 3.38       |                                 |      |
|                                                                                               |                                                 | Charcoal                                      | Contam.     | Contam.                                                                                                           | Contam. | Contam. | Contam. | Contam. |         |            |                                 |      |
|                                                                                               | 3                                               | Plain                                         | +           | ~166                                                                                                              | 17      | 1       | 0       | 0       | 8,500   | 3.93       |                                 |      |
|                                                                                               |                                                 | Charcoal                                      | +           | Contam.                                                                                                           | Contam. | Contam. | Contam. | Contam. |         |            |                                 |      |
|                                                                                               | 4                                               | Plain                                         | ~100        | 16                                                                                                                | 1       | 0       | 0       | 0       | 800     | 2.90       |                                 |      |
|                                                                                               |                                                 | Charcoal                                      | ~150        | Contam.                                                                                                           | Contam. | Contam. | Contam. | Contam. |         |            |                                 |      |
|                                                                                               | 5                                               | Plain                                         | +           | 56                                                                                                                | 8       | 0       | 0       | 0       | 3,300   | 3.52       |                                 |      |
|                                                                                               |                                                 | Charcoal                                      | +           | 66                                                                                                                | 4       | 0       | 0       | 0       |         |            |                                 |      |
| Clofazimine D<br>Day 1,<br>200 mg/kg;<br>Day 2,<br>100 mg/kg;<br>Days 3-14,<br>75 mg/kg daily | 1                                               | Plain                                         | Inhib.      | 9                                                                                                                 | 1       | 0       | 0       | 0       | 450     | 2.65       |                                 |      |
|                                                                                               |                                                 | Charcoal                                      | Contam.     | Contam.                                                                                                           | Contam. | Contam. | Contam. | 0       |         |            |                                 |      |
|                                                                                               | 2                                               | Plain                                         | Inhib.      | 5                                                                                                                 | 1       | 0       | 0       | 0       | 250     | 2.40       |                                 |      |
|                                                                                               |                                                 | Charcoal                                      | ~200        | Contam.                                                                                                           | Contam. | Contam. | Contam. | Contam. |         |            |                                 |      |
|                                                                                               | 3                                               | Plain                                         | 0           | 0                                                                                                                 | 0       | 0       | 0       | 0       | 1,500   | 3.18       |                                 |      |
|                                                                                               |                                                 | Charcoal                                      | 0           | 10                                                                                                                | 3       | 0       | 0       | 0       |         |            |                                 |      |
|                                                                                               | 4                                               | Plain                                         | 0           | 23                                                                                                                | 6       | 0       | 0       | 0       | 3,800   | 3.58       |                                 |      |
|                                                                                               |                                                 | Charcoal                                      | ~1000       | 76                                                                                                                | 7       | 1       | 0       | 0       |         |            |                                 |      |

**Table S2. Raw CFU count data from mouse spleens.**

| Time point         | Treatment group | Mouse    | Agar plates | Final (4-week) CFU counts for the following 10-fold dilutions:<br>(highlighted cell used to calculate CFU/spleen) |         |         |         |         |         | CFU/spleen | Log <sub>10</sub><br>CFU/spleen |
|--------------------|-----------------|----------|-------------|-------------------------------------------------------------------------------------------------------------------|---------|---------|---------|---------|---------|------------|---------------------------------|
|                    |                 |          |             | 0                                                                                                                 | 1       | 2       | 3       | 4       | 5       |            |                                 |
| Day 14<br>(Week 2) | Clofazimine D   | 5        | Plain       | 0                                                                                                                 | 3       | 0       | 0       | 0       | 0       | 1,100      | 3.04                            |
|                    |                 |          | Charcoal    | ~160                                                                                                              | 22      | Contam. | Contam. | 0       | 0       |            |                                 |
|                    | Clofazimine E   | 1        | Plain       | 0                                                                                                                 | 26      | 2       | 0       | 0       | 0       | 1,300      | 3.11                            |
|                    |                 |          | Charcoal    | ~1000                                                                                                             | Contam. | Contam. | Contam. | Contam. | Contam. |            |                                 |
|                    |                 | 2        | Plain       | 0                                                                                                                 | 62      | 5       | 0       | 0       | 0       | 9,000      | 3.95                            |
|                    |                 |          | Charcoal    | +                                                                                                                 | ~80     | 18      | 2       | Contam. | 0       |            |                                 |
|                    |                 | 3        | Plain       | 0                                                                                                                 | 19      | 1       | 0       | 0       | 0       | 950        | 2.98                            |
|                    |                 |          | Charcoal    | ~300                                                                                                              | Contam. | 0       | Contam. | 0       | 0       |            |                                 |
|                    |                 | 4        | Plain       | ~50                                                                                                               | 17      | 0       | 0       | 0       | 0       | 850        | 2.93                            |
|                    |                 |          | Charcoal    | ~250                                                                                                              | Contam. | Contam. | Contam. | 0       | 0       |            |                                 |
|                    |                 | 5        | Plain       | 0                                                                                                                 | 0       | 0       | 0       | 0       | 0       | 100        | 2.00                            |
|                    |                 |          | Charcoal    |                                                                                                                   | 2       | 0       | 0       | 0       | 0       |            |                                 |
|                    | Clofazimine F   | 1        | Plain       | Inhib.                                                                                                            | 23      | 3       | 1       | 0       | 0       | 1,150      | 3.06                            |
|                    |                 |          | Charcoal    | ~1000                                                                                                             | Contam. | Contam. | Contam. | Contam. | Contam. |            |                                 |
|                    |                 | 2        | Plain       | 0                                                                                                                 | 34      | 2       | 0       | 0       | 0       | 1,700      | 3.23                            |
|                    |                 |          | Charcoal    | ~250                                                                                                              | Contam. | Contam. | Contam. | Contam. | Contam. |            |                                 |
|                    |                 | 3        | Plain       | Inhib.                                                                                                            | 4       | 0       | 1       | 0       | 0       | 200        | 2.30                            |
|                    |                 |          | Charcoal    | 98                                                                                                                | Contam. | Contam. | Contam. | Contam. | Contam. |            |                                 |
| 4                  |                 | Plain    | Inhib.      | 45                                                                                                                | 7       | 1       | 0       | 0       | 12,500  | 4.10       |                                 |
|                    |                 | Charcoal | +           | ~160                                                                                                              | 25      | 2       | 0       | 0       |         |            |                                 |
| 5                  |                 | Plain    | Inhib.      | 36                                                                                                                | 3       | 0       | 0       | 0       | 4,000   | 3.60       |                                 |
|                    |                 | Charcoal | +           | 68                                                                                                                | 8       | 0       | 0       | 0       |         |            |                                 |
| Day 28<br>(Week 4) | Untreated       | 1        | Plain       | Inhib.                                                                                                            | ~250    | 54      | 3       | 0       | 0       | 27,000     | 4.43                            |
|                    |                 |          | Charcoal    | Contam.                                                                                                           | Contam. | Contam. | Contam. | 0       | 0       |            |                                 |
|                    |                 | 2        | Plain       | Inhib.                                                                                                            | ~250    | 14      | 0       | 0       | 0       | 7,000      | 3.85                            |
|                    |                 |          | Charcoal    | Contam.                                                                                                           | Contam. | Contam. | Contam. | Contam. | 0       |            |                                 |
|                    |                 | 3        | Plain       | Inhib.                                                                                                            | ~170    | 10      | 1       | 0       | 0       | 5,000      | 3.70                            |
|                    |                 |          | Charcoal    | Contam.                                                                                                           | Contam. | Contam. | Contam. | 1       | 0       |            |                                 |
|                    |                 | 4        | Plain       | Inhib.                                                                                                            | ~250    | 31      | 2       | 0       | 0       | 15,500     | 4.19                            |
|                    |                 |          | Charcoal    | Contam.                                                                                                           | Contam. | Contam. | 4       | 0       | 0       |            |                                 |
|                    |                 | 5        | Plain       | Inhib.                                                                                                            | Inhib.  | ~200    | 18      | 1       | 0       | 90,000     | 4.95                            |
|                    |                 |          | Charcoal    | Contam.                                                                                                           | Contam. | Contam. | Contam. | 0       | 0       |            |                                 |
|                    | Clofazimine A   | 1        | Plain       | 0                                                                                                                 | 0       | 0       | 0       | 0       | 0       | 0          | 0.00                            |
|                    |                 |          | Charcoal    | 0                                                                                                                 | 0       | 0       | 0       | 0       | 0       |            |                                 |
|                    |                 | 2        | Plain       | 0                                                                                                                 | 4       | 2       | 0       | 0       | 0       | 250        | 2.40                            |
|                    |                 |          | Charcoal    | 0                                                                                                                 | 5       | 0       | 0       | 0       | 0       |            |                                 |
|                    |                 | 3        | Plain       | 0                                                                                                                 | 6       | 1       | 0       | 0       | 0       | 300        | 2.48                            |
|                    |                 |          | Charcoal    | 0                                                                                                                 | 2       | 0       | 0       | 0       | 0       |            |                                 |
|                    |                 | 4        | Plain       | 0                                                                                                                 | 0       | 0       | 0       | 0       | 0       | 0          | 0.00                            |
|                    |                 |          | Charcoal    | 0                                                                                                                 | 0       | 0       | 0       | 0       | 0       |            |                                 |
|                    |                 | 5        | Plain       | 0                                                                                                                 | 0       | 0       | 0       | 0       | 0       | 100,000    | 5.00                            |
|                    |                 |          | Charcoal    | 0                                                                                                                 | 0       | 0       | 0       | 2       | 0       |            |                                 |
|                    | Clofazimine B   | 1        | Plain       | 0                                                                                                                 | 6       | 2       | 0       | 0       | 0       | 300        | 2.48                            |
|                    |                 |          | Charcoal    | Contam.                                                                                                           | Contam. | Contam. | Contam. | 0       | 0       |            |                                 |
| 2                  |                 | Plain    | 0           | 8                                                                                                                 | 0       | 0       | 0       | 0       | 400     | 2.60       |                                 |
|                    |                 | Charcoal | Contam.     | Contam.                                                                                                           | Contam. | Contam. | Contam. | 0       |         |            |                                 |

Table S2. Raw CFU count data from mouse spleens.

| Time point                                                                                                     | Treatment group                                                                                                                        | Mouse                                                                                                                                   | Agar plates | Final (4-week) CFU counts for the following 10-fold dilutions:<br>(highlighted cell used to calculate CFU/spleen) |         |         |         |         |       | CFU/spleen | Log <sub>10</sub><br>CFU/spleen |      |
|----------------------------------------------------------------------------------------------------------------|----------------------------------------------------------------------------------------------------------------------------------------|-----------------------------------------------------------------------------------------------------------------------------------------|-------------|-------------------------------------------------------------------------------------------------------------------|---------|---------|---------|---------|-------|------------|---------------------------------|------|
|                                                                                                                |                                                                                                                                        |                                                                                                                                         |             | 0                                                                                                                 | 1       | 2       | 3       | 4       | 5     |            |                                 |      |
| Day 28<br>(Week 4)                                                                                             | Clofazimine B<br><br>Day 1 -<br>Week 4,<br>12.5 mg/kg daily                                                                            | 3                                                                                                                                       | Plain       | Inhib.                                                                                                            | 4       | 0       | 0       | 0       | 0     | 200        | 2.30                            |      |
|                                                                                                                |                                                                                                                                        |                                                                                                                                         | Charcoal    | Contam.                                                                                                           | Contam. | Contam. | Contam. | Contam. | 0     |            |                                 |      |
|                                                                                                                |                                                                                                                                        | 4                                                                                                                                       | Plain       | Inhib.                                                                                                            | 30      | 2       | 1       | 0       | 0     | 1,500      | 3.18                            |      |
|                                                                                                                |                                                                                                                                        |                                                                                                                                         | Charcoal    | Contam.                                                                                                           | Contam. | Contam. | Contam. | 0       | 0     |            |                                 |      |
|                                                                                                                |                                                                                                                                        | 5                                                                                                                                       | Plain       | Inhib.                                                                                                            | 9       | 1       | 0       | 0       | 0     | 850        | 2.93                            |      |
|                                                                                                                |                                                                                                                                        |                                                                                                                                         | Charcoal    | 71                                                                                                                | 17      | 1       | 0       | 0       | 0     |            |                                 |      |
|                                                                                                                | Clofazimine C<br><br>Day 1 -<br>Week 4,<br>6.25 mg/kg daily                                                                            | 1                                                                                                                                       | Plain       | Inhib.                                                                                                            | 9       | 0       | 0       | 0       | 0     | 450        | 2.65                            |      |
|                                                                                                                |                                                                                                                                        |                                                                                                                                         | Charcoal    | Contam.                                                                                                           | Contam. | Contam. | Contam. | 0       | 0     |            |                                 |      |
|                                                                                                                |                                                                                                                                        | 2                                                                                                                                       | Plain       | Inhib.                                                                                                            | 1       | 0       | 0       | 0       | 0     | 50         | 1.71                            |      |
|                                                                                                                |                                                                                                                                        |                                                                                                                                         | Charcoal    | Contam.                                                                                                           | Contam. | Contam. | Contam. | Contam. | 0     |            |                                 |      |
|                                                                                                                |                                                                                                                                        | 3                                                                                                                                       | Plain       | Inhib.                                                                                                            | 26      | 1       | 0       | 0       | 0     | 1,300      | 3.11                            |      |
|                                                                                                                |                                                                                                                                        |                                                                                                                                         | Charcoal    | Contam.                                                                                                           | Contam. | Contam. | Contam. | 0       | 0     |            |                                 |      |
|                                                                                                                |                                                                                                                                        | 4                                                                                                                                       | Plain       | Inhib.                                                                                                            | 16      | 0       | 0       | 0       | 0     | 800        | 2.90                            |      |
|                                                                                                                |                                                                                                                                        |                                                                                                                                         | Charcoal    | Contam.                                                                                                           | Contam. | Contam. | Contam. | Contam. | 0     |            |                                 |      |
|                                                                                                                |                                                                                                                                        | 5                                                                                                                                       | Plain       | Inhib.                                                                                                            | 58      | 7       | 0       | 0       | 0     | 3,600      | 3.56                            |      |
|                                                                                                                |                                                                                                                                        |                                                                                                                                         | Charcoal    | ~800                                                                                                              | 72      | 4       | 0       | 0       | 0     |            |                                 |      |
|                                                                                                                |                                                                                                                                        | Clofazimine D<br><br>Day 1,<br>200 mg/kg;<br>Day 2,<br>100 mg/kg;<br>Days 3-14,<br>75 mg/kg daily;<br>Weeks 2-4,<br>25 mg/kg<br>3x/week | 1           | Plain                                                                                                             | 0       | 0       | 0       | 0       | 0     | 0          | 2,500                           | 3.40 |
|                                                                                                                |                                                                                                                                        |                                                                                                                                         |             | Charcoal                                                                                                          | 0       | Inhib.  | 5       | 0       | 0     | 0          |                                 |      |
|                                                                                                                | 2                                                                                                                                      |                                                                                                                                         | Plain       | 0                                                                                                                 | 3       | 1       | 0       | 0       | 0     | 1,500      | 3.18                            |      |
|                                                                                                                |                                                                                                                                        |                                                                                                                                         | Charcoal    | ~200                                                                                                              | 30      | 2       | 0       | 0       | 0     |            |                                 |      |
|                                                                                                                | 3                                                                                                                                      |                                                                                                                                         | Plain       | 0                                                                                                                 | 9       | 5       | 2       | 0       | 0     | 1,400      | 3.15                            |      |
|                                                                                                                |                                                                                                                                        |                                                                                                                                         | Charcoal    | ~200                                                                                                              | 28      | 2       | 0       | 0       | 0     |            |                                 |      |
|                                                                                                                | 4                                                                                                                                      |                                                                                                                                         | Plain       | 0                                                                                                                 | 0       | 0       | 0       | 0       | 0     | 500        | 2.70                            |      |
|                                                                                                                |                                                                                                                                        |                                                                                                                                         | Charcoal    | 0                                                                                                                 | 3       | 1       | 0       | 0       | 0     |            |                                 |      |
|                                                                                                                | 5                                                                                                                                      |                                                                                                                                         | Plain       | Inhib.                                                                                                            | 17      | 7       | 0       | 0       | 0     | 3,450      | 3.54                            |      |
|                                                                                                                |                                                                                                                                        |                                                                                                                                         | Charcoal    | ~500                                                                                                              | 69      | 2       | 1       | 0       | 0     |            |                                 |      |
|                                                                                                                | Clofazimine E<br><br>Day 1,<br>100 mg/kg;<br>Day 2,<br>75 mg/kg;<br>Days 3-14,<br>50 mg/kg daily;<br>Weeks 2-4,<br>25 mg/kg<br>3x/week | 1                                                                                                                                       | Plain       | 0                                                                                                                 | 2       | 0       | 0       | 0       | 0     | 100        | 2.00                            |      |
|                                                                                                                |                                                                                                                                        |                                                                                                                                         | Charcoal    | Inhib.                                                                                                            | 1       | 0       | 0       | 0       | 0     |            |                                 |      |
| 2                                                                                                              |                                                                                                                                        | Plain                                                                                                                                   | 0           | 15                                                                                                                | 1       | 0       | 0       | 0       | 1,000 | 3.00       |                                 |      |
|                                                                                                                |                                                                                                                                        | Charcoal                                                                                                                                | ~300        | 20                                                                                                                | 2       | 0       | 0       | 0       |       |            |                                 |      |
| 3                                                                                                              |                                                                                                                                        | Plain                                                                                                                                   | 0           | 6                                                                                                                 | 0       | 0       | 0       | 0       | 400   | 2.60       |                                 |      |
|                                                                                                                |                                                                                                                                        | Charcoal                                                                                                                                | Inhib.      | 8                                                                                                                 | 0       | 0       | 0       | 0       |       |            |                                 |      |
| 4                                                                                                              |                                                                                                                                        | Plain                                                                                                                                   | 0           | 3                                                                                                                 | 1       | 0       | 0       | 0       | 550   | 2.74       |                                 |      |
|                                                                                                                |                                                                                                                                        | Charcoal                                                                                                                                | Inhib.      | 11                                                                                                                | 1       | 0       | 0       | 0       |       |            |                                 |      |
| 5                                                                                                              |                                                                                                                                        | Plain                                                                                                                                   | 0           | 0                                                                                                                 | 0       | 0       | 0       | 0       | 10    | 1.04       |                                 |      |
|                                                                                                                |                                                                                                                                        | Charcoal                                                                                                                                | 2           | 0                                                                                                                 | 0       | 0       | 0       | 0       |       |            |                                 |      |
| Clofazimine F<br><br>Day 1,<br>50 mg/kg;<br>Days 2-14,<br>25 mg/kg daily;<br>Weeks 2-4,<br>25 mg/kg<br>3x/week | 1                                                                                                                                      | Plain                                                                                                                                   | 0           | Inhib.                                                                                                            | 3       | 0       | 0       | 0       | 850   | 2.93       |                                 |      |
|                                                                                                                |                                                                                                                                        | Charcoal                                                                                                                                | 147         | 17                                                                                                                | 1       | 0       | 0       | 0       |       |            |                                 |      |
|                                                                                                                | 2                                                                                                                                      | Plain                                                                                                                                   | Inhib.      | 1                                                                                                                 | 0       | 0       | 0       | 0       | 200   | 2.30       |                                 |      |
|                                                                                                                |                                                                                                                                        | Charcoal                                                                                                                                | 45          | 4                                                                                                                 | 0       | 0       | 0       | 0       |       |            |                                 |      |
|                                                                                                                | 3                                                                                                                                      | Plain                                                                                                                                   | 0           | 3                                                                                                                 | 0       | 0       | 0       | 0       | 350   | 2.55       |                                 |      |
|                                                                                                                |                                                                                                                                        | Charcoal                                                                                                                                | 0           | 7                                                                                                                 | 0       | 0       | 0       | 0       |       |            |                                 |      |
|                                                                                                                | 4                                                                                                                                      | Plain                                                                                                                                   | Inhib.      | 12                                                                                                                | 0       | 0       | 0       | 0       | 1,150 | 3.06       |                                 |      |
|                                                                                                                |                                                                                                                                        | Charcoal                                                                                                                                | ~200        | 23                                                                                                                | 2       | 0       | 0       | 0       |       |            |                                 |      |
|                                                                                                                | 5                                                                                                                                      | Plain                                                                                                                                   | 3           | 2                                                                                                                 | 0       | 0       | 0       | 0       | 250   | 2.40       |                                 |      |
|                                                                                                                |                                                                                                                                        | Charcoal                                                                                                                                | Inhib.      | 5                                                                                                                 | 1       | 0       | 0       | 0       |       |            |                                 |      |

Table S2. Raw CFU count data from mouse spleens.

| Time point                                                                                                                 | Treatment group                                       | Mouse    | Agar plates | Final (4-week) CFU counts for the following 10-fold dilutions:<br>(highlighted cell used to calculate CFU/spleen) |       |      |    |   |       | CFU/spleen | Log <sub>10</sub><br>CFU/spleen |
|----------------------------------------------------------------------------------------------------------------------------|-------------------------------------------------------|----------|-------------|-------------------------------------------------------------------------------------------------------------------|-------|------|----|---|-------|------------|---------------------------------|
|                                                                                                                            |                                                       |          |             | 0                                                                                                                 | 1     | 2    | 3  | 4 | 5     |            |                                 |
| Day 56<br>(Week 8)                                                                                                         | Untreated                                             | 1        | Plain       | +++                                                                                                               | +     | 97   | 7  | 1 | 0     | 85,000     | 4.93                            |
|                                                                                                                            |                                                       |          | Charcoal    | ++                                                                                                                | +     | ~100 | 17 | 0 | 0     |            |                                 |
|                                                                                                                            |                                                       | 2        | Plain       | +                                                                                                                 | ~400  | 41   | 3  | 0 | 0     | 21,500     | 4.33                            |
|                                                                                                                            |                                                       |          | Charcoal    | +                                                                                                                 | ~400  | 43   | 4  | 0 | 0     |            |                                 |
|                                                                                                                            |                                                       | 3        | Plain       | ++                                                                                                                | +     | ~200 | 18 | 2 | 0     | 120,000    | 5.08                            |
|                                                                                                                            |                                                       |          | Charcoal    | ++                                                                                                                | +     | ~200 | 24 | 0 | 0     |            |                                 |
|                                                                                                                            |                                                       | 4        | Plain       | +                                                                                                                 | ~1000 | 57   | 2  | 0 | 0     | 40,000     | 4.60                            |
|                                                                                                                            |                                                       |          | Charcoal    | +                                                                                                                 | ~1000 | 80   | 9  | 0 | 0     |            |                                 |
|                                                                                                                            |                                                       | 5        | Plain       | +                                                                                                                 | ~200  | 25   | 1  | 0 | 0     | 13,000     | 4.11                            |
|                                                                                                                            |                                                       |          | Charcoal    | +                                                                                                                 | ~200  | 26   | 2  | 0 | 0     |            |                                 |
|                                                                                                                            | Clofazimine A<br>Day 1 -<br>Week 8,<br>25 mg/kg daily | 1        | Plain       | 0                                                                                                                 | 1     | 0    | 0  | 0 | 0     | 50         | 1.71                            |
|                                                                                                                            |                                                       |          | Charcoal    | 6                                                                                                                 | 1     | 0    | 0  | 0 | 0     |            |                                 |
|                                                                                                                            |                                                       | 2        | Plain       | 2                                                                                                                 | 11    | 1    | 1  | 0 | 0     | 1,350      | 3.13                            |
|                                                                                                                            |                                                       |          | Charcoal    | ~100                                                                                                              | 27    | 4    | 0  | 0 | 0     |            |                                 |
|                                                                                                                            |                                                       | 3        | Plain       | 0                                                                                                                 | 3     | 0    | 0  | 0 | 0     | 450        | 2.65                            |
|                                                                                                                            |                                                       |          | Charcoal    | 53                                                                                                                | 9     | 1    | 0  | 0 | 0     |            |                                 |
|                                                                                                                            |                                                       | 4        | Plain       | 0                                                                                                                 | 0     | 0    | 0  | 0 | 0     | 20         | 1.32                            |
|                                                                                                                            |                                                       |          | Charcoal    | 4                                                                                                                 | 0     | 0    | 0  | 0 | 0     |            |                                 |
| 5                                                                                                                          |                                                       | Plain    | 0           | 3                                                                                                                 | 0     | 1    | 0  | 0 | 150   | 2.18       |                                 |
|                                                                                                                            |                                                       | Charcoal | 33          | 1                                                                                                                 | 0     | 0    | 0  | 0 |       |            |                                 |
| Clofazimine B<br>Day 1 -<br>Week 8,<br>12.5 mg/kg daily                                                                    | 1                                                     | Plain    | 0           | 0                                                                                                                 | 0     | 0    | 0  | 0 | 25    | 1.41       |                                 |
|                                                                                                                            |                                                       | Charcoal | 5           | 0                                                                                                                 | 0     | 0    | 0  | 0 |       |            |                                 |
|                                                                                                                            | 2                                                     | Plain    | 0           | 2                                                                                                                 | 1     | 0    | 0  | 0 | 100   | 2.00       |                                 |
|                                                                                                                            |                                                       | Charcoal | 27          | 2                                                                                                                 | 0     | 0    | 0  | 0 |       |            |                                 |
|                                                                                                                            | 3                                                     | Plain    | 2           | 2                                                                                                                 | 0     | 0    | 0  | 0 | 100   | 2.00       |                                 |
|                                                                                                                            |                                                       | Charcoal | 52          | 2                                                                                                                 | 1     | 0    | 0  | 0 |       |            |                                 |
|                                                                                                                            | 4                                                     | Plain    | 0           | 16                                                                                                                | 5     | 0    | 0  | 0 | 3,550 | 3.55       |                                 |
|                                                                                                                            |                                                       | Charcoal | ~256        | 71                                                                                                                | 4     | 0    | 0  | 0 |       |            |                                 |
|                                                                                                                            | 5                                                     | Plain    | ~200        | 24                                                                                                                | 0     | 0    | 0  | 0 | 1,200 | 3.08       |                                 |
|                                                                                                                            |                                                       | Charcoal | 24          | 12                                                                                                                | 0     | 0    | 0  | 0 |       |            |                                 |
| Clofazimine C<br>Day 1 -<br>Week 8,<br>6.25 mg/kg daily                                                                    | 1                                                     | Plain    | 32          | 3                                                                                                                 | 1     | 0    | 0  | 0 | 450   | 2.65       |                                 |
|                                                                                                                            |                                                       | Charcoal | 85          | 9                                                                                                                 | 1     | 0    | 0  | 0 |       |            |                                 |
|                                                                                                                            | 2                                                     | Plain    | ~150        | 32                                                                                                                | 3     | 1    | 0  | 0 | 2,050 | 3.31       |                                 |
|                                                                                                                            |                                                       | Charcoal | ~150        | 41                                                                                                                | 1     | 1    | 0  | 0 |       |            |                                 |
|                                                                                                                            | 3                                                     | Plain    | ~100        | 23                                                                                                                | 1     | 0    | 0  | 0 | 1,150 | 3.06       |                                 |
|                                                                                                                            |                                                       | Charcoal | ~200        | 19                                                                                                                | 2     | 0    | 0  | 0 |       |            |                                 |
|                                                                                                                            | 4                                                     | Plain    | ~50         | 15                                                                                                                | 2     | 0    | 0  | 0 | 1,300 | 3.11       |                                 |
|                                                                                                                            |                                                       | Charcoal | ~200        | 26                                                                                                                | 0     | 0    | 0  | 0 |       |            |                                 |
|                                                                                                                            | 5                                                     | Plain    | 17          | 7                                                                                                                 | 0     | 0    | 0  | 0 | 850   | 2.93       |                                 |
|                                                                                                                            |                                                       | Charcoal | 68          | 17                                                                                                                | 0     | 0    | 0  | 0 |       |            |                                 |
| Clofazimine D<br>Day 1, 200 mg/kg;<br>Day 2, 100 mg/kg;<br>Days 3-14,<br>75 mg/kg daily;<br>Weeks 2-8,<br>25 mg/kg 3x/week | 1                                                     | Plain    | 0           | 2                                                                                                                 | 0     | 0    | 0  | 0 | 100   | 2.00       |                                 |
|                                                                                                                            |                                                       | Charcoal | 22          | 1                                                                                                                 | 0     | 0    | 0  | 0 |       |            |                                 |
|                                                                                                                            | 2                                                     | Plain    | 1           | 0                                                                                                                 | 0     | 0    | 0  | 0 | 200   | 2.30       |                                 |
|                                                                                                                            |                                                       | Charcoal | 18          | 4                                                                                                                 | 1     | 0    | 0  | 0 |       |            |                                 |
|                                                                                                                            | 3                                                     | Plain    | 0           | 0                                                                                                                 | 0     | 0    | 0  | 0 | 35    | 1.56       |                                 |
|                                                                                                                            |                                                       | Charcoal | 7           | 0                                                                                                                 | 0     | 0    | 0  | 0 |       |            |                                 |

Table S2. Raw CFU count data from mouse spleens.

| Time point          | Treatment group                                                                                                                    | Mouse                                                                                                      | Agar plates | Final (4-week) CFU counts for the following 10-fold dilutions:<br>(highlighted cell used to calculate CFU/spleen) |    |    |   |   |   | CFU/spleen | Log <sub>10</sub><br>CFU/spleen |      |
|---------------------|------------------------------------------------------------------------------------------------------------------------------------|------------------------------------------------------------------------------------------------------------|-------------|-------------------------------------------------------------------------------------------------------------------|----|----|---|---|---|------------|---------------------------------|------|
|                     |                                                                                                                                    |                                                                                                            |             | 0                                                                                                                 | 1  | 2  | 3 | 4 | 5 |            |                                 |      |
| Day 56<br>(Week 8)  | Clofazimine D                                                                                                                      | 4                                                                                                          | Plain       | 0                                                                                                                 | 4  | 0  | 0 | 0 | 0 | 200        | 2.30                            |      |
|                     |                                                                                                                                    |                                                                                                            | Charcoal    | 35                                                                                                                | 3  | 0  | 0 | 0 | 0 |            |                                 |      |
|                     |                                                                                                                                    | 5                                                                                                          | Plain       | 0                                                                                                                 | 2  | 0  | 0 | 0 | 0 | 400        | 2.60                            |      |
|                     |                                                                                                                                    |                                                                                                            | Charcoal    | 16                                                                                                                | 8  | 0  | 0 | 0 | 0 |            |                                 |      |
|                     | Clofazimine E<br>Day 1,<br>100 mg/kg;<br>Day 2,<br>75 mg/kg;<br>Days 3-14,<br>50 mg/kg daily;<br>Weeks 2-8,<br>25 mg/kg<br>3x/week | 1                                                                                                          | Plain       | 0                                                                                                                 | 6  | 0  | 0 | 0 | 0 | 550        | 2.74                            |      |
|                     |                                                                                                                                    |                                                                                                            | Charcoal    | 64                                                                                                                | 11 | 2  | 0 | 0 | 0 |            |                                 |      |
|                     |                                                                                                                                    | 2                                                                                                          | Plain       | 0                                                                                                                 | 1  | 2  | 0 | 0 | 0 | 150        | 2.18                            |      |
|                     |                                                                                                                                    |                                                                                                            | Charcoal    | 13                                                                                                                | 3  | 0  | 0 | 0 | 0 |            |                                 |      |
|                     |                                                                                                                                    | 3                                                                                                          | Plain       | 0                                                                                                                 | 1  | 0  | 0 | 0 | 0 | 50         | 1.71                            |      |
|                     |                                                                                                                                    |                                                                                                            | Charcoal    | 8                                                                                                                 | 0  | 0  | 0 | 0 | 0 |            |                                 |      |
|                     |                                                                                                                                    | 4                                                                                                          | Plain       | 0                                                                                                                 | 1  | 1  | 0 | 0 | 0 | 300        | 2.48                            |      |
|                     |                                                                                                                                    |                                                                                                            | Charcoal    | 42                                                                                                                | 6  | 1  | 0 | 0 | 0 |            |                                 |      |
|                     |                                                                                                                                    | 5                                                                                                          | Plain       | 0                                                                                                                 | 0  | 0  | 0 | 0 | 0 | 15         | 1.20                            |      |
|                     |                                                                                                                                    |                                                                                                            | Charcoal    | 3                                                                                                                 | 0  | 0  | 0 | 0 | 0 |            |                                 |      |
|                     |                                                                                                                                    | Clofazimine F<br>Day 1,<br>50 mg/kg;<br>Days 2-14,<br>25 mg/kg daily;<br>Weeks 2-8,<br>25 mg/kg<br>3x/week | 1           | Plain                                                                                                             | 6  | 5  | 0 | 0 | 0 | 0          | 250                             | 2.40 |
|                     |                                                                                                                                    |                                                                                                            |             | Charcoal                                                                                                          | 82 | 4  | 0 | 0 | 0 | 0          |                                 |      |
|                     | 2                                                                                                                                  |                                                                                                            | Plain       | 0                                                                                                                 | 5  | 0  | 0 | 0 | 0 | 450        | 2.65                            |      |
|                     |                                                                                                                                    |                                                                                                            | Charcoal    | 41                                                                                                                | 9  | 1  | 0 | 0 | 0 |            |                                 |      |
|                     | 3                                                                                                                                  |                                                                                                            | Plain       | 0                                                                                                                 | 5  | 1  | 0 | 0 | 0 | 250        | 2.40                            |      |
|                     |                                                                                                                                    |                                                                                                            | Charcoal    | 60                                                                                                                | 1  | 1  | 0 | 0 | 0 |            |                                 |      |
|                     | 4                                                                                                                                  |                                                                                                            | Plain       | 0                                                                                                                 | 1  | 1  | 0 | 0 | 0 | 50         | 1.71                            |      |
|                     |                                                                                                                                    |                                                                                                            | Charcoal    | 7                                                                                                                 | 1  | 0  | 0 | 0 | 0 |            |                                 |      |
|                     | 5                                                                                                                                  |                                                                                                            | Plain       | 0                                                                                                                 | 0  | 0  | 0 | 0 | 0 | 100        | 2.00                            |      |
|                     |                                                                                                                                    |                                                                                                            | Charcoal    | 16                                                                                                                | 2  | 0  | 0 | 0 | 0 |            |                                 |      |
| Day 84<br>(Week 12) | Untreated                                                                                                                          | 1                                                                                                          | Plain       | + / + +                                                                                                           | +  | 36 | 3 | 0 | 0 | 22,500     | 4.35                            |      |
|                     |                                                                                                                                    |                                                                                                            | Charcoal    | + / + +                                                                                                           | +  | 45 | 1 | 2 | 0 |            |                                 |      |
|                     |                                                                                                                                    | 2                                                                                                          | Plain       | + / + +                                                                                                           | +  | 26 | 3 | 0 | 0 | 21,500     | 4.33                            |      |
|                     |                                                                                                                                    |                                                                                                            | Charcoal    | + / + +                                                                                                           | +  | 43 | 3 | 0 | 0 |            |                                 |      |
|                     |                                                                                                                                    | 3                                                                                                          | Plain       | Contam.                                                                                                           | +  | 39 | 2 | 2 | 1 | 19,500     | 4.29                            |      |
|                     |                                                                                                                                    |                                                                                                            | Charcoal    | + / + +                                                                                                           | +  | 37 | 6 | 0 | 0 |            |                                 |      |
|                     |                                                                                                                                    | 4                                                                                                          | Plain       | + / + +                                                                                                           | +  | 48 | 6 | 2 | 0 | 28,000     | 4.45                            |      |
|                     |                                                                                                                                    |                                                                                                            | Charcoal    | + / + +                                                                                                           | +  | 56 | 3 | 2 | 0 |            |                                 |      |
|                     |                                                                                                                                    | 5                                                                                                          | Plain       | +                                                                                                                 | +  | 23 | 3 | 0 | 0 | 15,500     | 4.19                            |      |
|                     |                                                                                                                                    |                                                                                                            | Charcoal    | +                                                                                                                 | +  | 31 | 2 | 0 | 0 |            |                                 |      |
|                     |                                                                                                                                    | Clofazimine A<br>Day 1 -<br>Week 12,<br>25 mg/kg daily                                                     | 1           | Plain                                                                                                             | 0  | 0  | 0 | 0 | 0 | 0          | 0                               | 0.00 |
|                     |                                                                                                                                    |                                                                                                            |             | Charcoal                                                                                                          | 0  | 0  | 0 | 0 | 0 | 0          |                                 |      |
|                     | 2                                                                                                                                  |                                                                                                            | Plain       | 0                                                                                                                 | 0  | 0  | 0 | 0 | 0 | 0          | 0.00                            |      |
|                     |                                                                                                                                    |                                                                                                            | Charcoal    | Contam.                                                                                                           | 0  | 0  | 0 | 0 | 0 |            |                                 |      |
|                     | 3                                                                                                                                  |                                                                                                            | Plain       | 0                                                                                                                 | 0  | 0  | 0 | 0 | 0 | 10         | 1.04                            |      |
|                     |                                                                                                                                    |                                                                                                            | Charcoal    | 2                                                                                                                 | 0  | 0  | 0 | 0 | 0 |            |                                 |      |
|                     | 4                                                                                                                                  |                                                                                                            | Plain       | 0                                                                                                                 | 0  | 0  | 0 | 0 | 0 | 0          | 0.00                            |      |
|                     |                                                                                                                                    |                                                                                                            | Charcoal    | 0                                                                                                                 | 0  | 0  | 0 | 0 | 0 |            |                                 |      |
|                     | 5                                                                                                                                  |                                                                                                            | Plain       | 0                                                                                                                 | 0  | 0  | 0 | 0 | 0 | 35         | 1.56                            |      |
|                     |                                                                                                                                    |                                                                                                            | Charcoal    | 7                                                                                                                 | 0  | 0  | 0 | 0 | 0 |            |                                 |      |
|                     | Clofazimine B                                                                                                                      | 1                                                                                                          | Plain       | 1                                                                                                                 | 1  | 0  | 0 | 0 | 0 | 100        | 2.00                            |      |
|                     |                                                                                                                                    |                                                                                                            | Charcoal    | 3                                                                                                                 | 2  | 0  | 0 | 0 | 0 |            |                                 |      |

**Table S2. Raw CFU count data from mouse spleens.**

| Time point                                                                                                  | Treatment group                                                                                                                      | Mouse    | Agar plates | Final (4-week) CFU counts for the following 10-fold dilutions:<br>(highlighted cell used to calculate CFU/spleen) |    |   |   |   |     | CFU/spleen | Log <sub>10</sub><br>CFU/spleen |
|-------------------------------------------------------------------------------------------------------------|--------------------------------------------------------------------------------------------------------------------------------------|----------|-------------|-------------------------------------------------------------------------------------------------------------------|----|---|---|---|-----|------------|---------------------------------|
|                                                                                                             |                                                                                                                                      |          |             | 0                                                                                                                 | 1  | 2 | 3 | 4 | 5   |            |                                 |
| Day 84<br>(Week 12)                                                                                         | Clofazimine B<br>Day 1 -<br>Week 12,<br>12.5 mg/kg daily                                                                             | 2        | Plain       | 0                                                                                                                 | 5  | 0 | 0 | 0 | 0   | 250        | 2.40                            |
|                                                                                                             |                                                                                                                                      |          | Charcoal    | ~49                                                                                                               | 5  | 1 | 0 | 0 | 0   |            |                                 |
|                                                                                                             |                                                                                                                                      | 3        | Plain       | 0                                                                                                                 | 0  | 0 | 0 | 0 | 0   | 100        | 2.00                            |
|                                                                                                             |                                                                                                                                      |          | Charcoal    | 7                                                                                                                 | 2  | 0 | 0 | 0 | 0   |            |                                 |
|                                                                                                             |                                                                                                                                      | 4        | Plain       | 0                                                                                                                 | 0  | 0 | 0 | 0 | 0   | 50         | 1.71                            |
|                                                                                                             |                                                                                                                                      |          | Charcoal    | 2                                                                                                                 | 1  | 0 | 0 | 0 | 0   |            |                                 |
|                                                                                                             | 5                                                                                                                                    | Plain    | Inhib.      | 5                                                                                                                 | 0  | 0 | 0 | 0 | 300 | 2.48       |                                 |
|                                                                                                             |                                                                                                                                      | Charcoal | Inhib.      | 6                                                                                                                 | 2  | 0 | 0 | 0 |     |            |                                 |
|                                                                                                             | Clofazimine C<br>Day 1 -<br>Week 12,<br>6.25 mg/kg daily                                                                             | 1        | Plain       | 1                                                                                                                 | 0  | 0 | 0 | 0 | 0   | 50         | 1.71                            |
|                                                                                                             |                                                                                                                                      |          | Charcoal    | 6                                                                                                                 | 1  | 0 | 0 | 0 | 0   |            |                                 |
|                                                                                                             |                                                                                                                                      | 2        | Plain       | 1                                                                                                                 | 1  | 0 | 0 | 0 | 0   | 50         | 1.71                            |
|                                                                                                             |                                                                                                                                      |          | Charcoal    | 0                                                                                                                 | 0  | 0 | 0 | 0 | 0   |            |                                 |
|                                                                                                             |                                                                                                                                      | 3        | Plain       | 1                                                                                                                 | 0  | 0 | 0 | 0 | 0   | 35         | 1.56                            |
|                                                                                                             |                                                                                                                                      |          | Charcoal    | 7                                                                                                                 | 0  | 0 | 0 | 0 | 0   |            |                                 |
|                                                                                                             |                                                                                                                                      | 4        | Plain       | 12                                                                                                                | 2  | 0 | 0 | 0 | 0   | 350        | 2.55                            |
|                                                                                                             |                                                                                                                                      |          | Charcoal    | ~100                                                                                                              | 7  | 0 | 0 | 0 | 0   |            |                                 |
|                                                                                                             |                                                                                                                                      | 5        | Plain       | 22                                                                                                                | 12 | 2 | 0 | 0 | 0   | 650        | 2.81                            |
|                                                                                                             |                                                                                                                                      |          | Charcoal    | ~50                                                                                                               | 13 | 1 | 0 | 0 | 0   |            |                                 |
|                                                                                                             | Clofazimine D<br>Day 1,<br>200 mg/kg;<br>Day 2,<br>100 mg/kg;<br>Days 3-14,<br>75 mg/kg daily;<br>Weeks 2-12,<br>25 mg/kg<br>3x/week | 1        | Plain       | 0                                                                                                                 | 0  | 0 | 0 | 0 | 0   | 200        | 2.30                            |
|                                                                                                             |                                                                                                                                      |          | Charcoal    | Inhib.                                                                                                            | 4  | 0 | 0 | 0 | 0   |            |                                 |
|                                                                                                             |                                                                                                                                      | 2        | Plain       | 0                                                                                                                 | 0  | 0 | 0 | 0 | 0   | 5          | 0.78                            |
|                                                                                                             |                                                                                                                                      |          | Charcoal    | 1                                                                                                                 | 0  | 0 | 0 | 0 | 0   |            |                                 |
|                                                                                                             |                                                                                                                                      | 3        | Plain       | 0                                                                                                                 | 0  | 0 | 0 | 0 | 0   | 25         | 1.41                            |
|                                                                                                             |                                                                                                                                      |          | Charcoal    | 5                                                                                                                 | 0  | 0 | 0 | 0 | 0   |            |                                 |
|                                                                                                             |                                                                                                                                      | 4        | Plain       | 0                                                                                                                 | 0  | 0 | 0 | 0 | 0   | 15         | 1.20                            |
|                                                                                                             |                                                                                                                                      |          | Charcoal    | 3                                                                                                                 | 0  | 0 | 0 | 0 | 0   |            |                                 |
|                                                                                                             |                                                                                                                                      | 5        | Plain       | 0                                                                                                                 | 0  | 0 | 0 | 0 | 0   | 10         | 1.04                            |
|                                                                                                             |                                                                                                                                      |          | Charcoal    | 2                                                                                                                 | 0  | 0 | 0 | 0 | 0   |            |                                 |
|                                                                                                             | Clofazimine E<br>Day 1,<br>100 mg/kg;<br>Day 2,<br>75 mg/kg;<br>Days 3-14,<br>50 mg/kg daily;<br>Weeks 2-12,<br>25 mg/kg<br>3x/week  | 1        | Plain       | 0                                                                                                                 | 0  | 0 | 0 | 0 | 0   | 10         | 1.04                            |
|                                                                                                             |                                                                                                                                      |          | Charcoal    | 2                                                                                                                 | 0  | 0 | 0 | 0 | 0   |            |                                 |
| 2                                                                                                           |                                                                                                                                      | Plain    | 0           | 1                                                                                                                 | 0  | 0 | 0 | 0 | 150 | 2.18       |                                 |
|                                                                                                             |                                                                                                                                      | Charcoal | Contam.     | 3                                                                                                                 | 0  | 0 | 0 | 0 |     |            |                                 |
| 3                                                                                                           |                                                                                                                                      | Plain    | 0           | 0                                                                                                                 | 0  | 0 | 0 | 0 | 15  | 1.20       |                                 |
|                                                                                                             |                                                                                                                                      | Charcoal | 3           | 0                                                                                                                 | 0  | 0 | 0 | 0 |     |            |                                 |
| 4                                                                                                           |                                                                                                                                      | Plain    | 0           | 0                                                                                                                 | 0  | 0 | 0 | 0 | 0   | 0.00       |                                 |
|                                                                                                             |                                                                                                                                      | Charcoal | 0           | 0                                                                                                                 | 0  | 0 | 0 | 0 |     |            |                                 |
| 5                                                                                                           |                                                                                                                                      | Plain    | 0           | 1                                                                                                                 | 0  | 0 | 0 | 0 | 50  | 1.71       |                                 |
|                                                                                                             |                                                                                                                                      | Charcoal | 1           | 0                                                                                                                 | 0  | 0 | 0 | 0 |     |            |                                 |
| Clofazimine F<br>Day 1,<br>50 mg/kg;<br>Days 2-14,<br>25 mg/kg daily;<br>Weeks 2-12,<br>25 mg/kg<br>3x/week | 1                                                                                                                                    | Plain    | Inhib.      | 1                                                                                                                 | 0  | 0 | 0 | 0 | 50  | 1.71       |                                 |
|                                                                                                             |                                                                                                                                      | Charcoal | Inhib.      | 1                                                                                                                 | 0  | 0 | 0 | 0 |     |            |                                 |
|                                                                                                             | 2                                                                                                                                    | Plain    | 0           | 0                                                                                                                 | 0  | 0 | 0 | 0 | 0   | 0.00       |                                 |
|                                                                                                             |                                                                                                                                      | Charcoal | 0           | 0                                                                                                                 | 0  | 0 | 0 | 0 |     |            |                                 |
|                                                                                                             | 3                                                                                                                                    | Plain    | 0           | 0                                                                                                                 | 0  | 0 | 0 | 0 | 0   | 0.00       |                                 |
|                                                                                                             |                                                                                                                                      | Charcoal | 0           | 0                                                                                                                 | 0  | 0 | 0 | 0 |     |            |                                 |
|                                                                                                             | 4                                                                                                                                    | Plain    | 0           | 0                                                                                                                 | 0  | 0 | 0 | 0 | 5   | 0.78       |                                 |
|                                                                                                             |                                                                                                                                      | Charcoal | 1           | 0                                                                                                                 | 0  | 0 | 0 | 0 |     |            |                                 |



**Table S2. Raw CFU count data from mouse spleens.**

| Time point          | Treatment group | Mouse | Agar plates | Final (4-week) CFU counts for the following 10-fold dilutions:<br>(highlighted cell used to calculate CFU/spleen) |   |   |   |   |   | CFU/spleen | Log <sub>10</sub> CFU/spleen |
|---------------------|-----------------|-------|-------------|-------------------------------------------------------------------------------------------------------------------|---|---|---|---|---|------------|------------------------------|
|                     |                 |       |             | 0                                                                                                                 | 1 | 2 | 3 | 4 | 5 |            |                              |
| Day 84<br>(Week 12) | Clofazimine F   | 5     | Plain       | 0                                                                                                                 | 0 | 0 | 0 | 0 | 0 | 15         | 1.20                         |
|                     |                 |       | Charcoal    | 3                                                                                                                 | 0 | 0 | 0 | 0 | 0 |            |                              |

+++ indicates uniform confluent growth.

++ indicates non-uniform confluent growth.

+ indicates individual colonies too numerous to accurately count or estimate.

~ indicates that an accurate CFU count could not be obtained due to some merged/touching colonies.

Blank cell, data not available.

Contam., contamination.

Inhib., visible growth inhibition.

**Table S3. Clofazimine concentration measurements in the lungs from uninfected mice.**

| Sample            | Week | Weeks of CFZ administration | Weeks post-CFZ administration | Mean [CFZ] ( $\mu\text{g/g}$ ) | SD    |
|-------------------|------|-----------------------------|-------------------------------|--------------------------------|-------|
| Lung accumulation | 1    | 1                           | ---                           | 5.23                           | 2.57  |
|                   | 2    | 2                           | ---                           | 11.27                          | 2.77  |
|                   | 4    | 4                           | ---                           | 29.98                          | 5.00  |
|                   | 8    | 8                           | ---                           | 52.59                          | 6.74  |
|                   | 12   | 12                          | ---                           | 40.83                          | 8.16  |
|                   | 16   | 16                          | ---                           | 29.76                          | 13.07 |
|                   | 20   | 20                          | ---                           | 37.39                          | 5.45  |
| Lung elimination  | 5    | 4                           | 1                             | 11.89                          | 2.31  |
|                   | 6    | 4                           | 2                             | 7.13                           | 2.13  |
|                   | 8    | 4                           | 4                             | 2.57                           | 1.30  |
|                   | 12   | 4                           | 8                             | 0.13                           | 0.01  |
|                   | 20   | 4                           | 16                            | 0.67                           | 0.22  |
|                   | 28   | 4                           | 24                            | 0.17                           | 0.05  |
|                   | 9    | 8                           | 1                             | 18.87                          | 2.17  |
|                   | 10   | 8                           | 2                             | 19.97                          | 2.36  |
|                   | 12   | 8                           | 4                             | 8.69                           | 0.20  |
|                   | 16   | 8                           | 8                             | 0.51                           | 0.44  |
|                   | 24   | 8                           | 16                            | 8.0                            | 11.98 |
|                   | 32   | 8                           | 24                            | 0.18                           | 0.19  |
|                   | 13   | 12                          | 1                             | 45.31                          | 14.86 |
|                   | 14   | 12                          | 2                             | 27.22                          | 2.43  |
|                   | 16   | 12                          | 4                             | 4.15                           | 2.33  |
|                   | 20   | 12                          | 8                             | 3.76                           | 1.51  |
|                   | 28   | 12                          | 16                            | 1.11                           | 0.47  |
|                   | 36   | 12                          | 24                            | 0.31                           | 0.19  |
|                   | 17   | 16                          | 1                             | 23.61                          | 12.03 |
|                   | 18   | 16                          | 2                             | 23.00                          | 4.23  |
|                   | 20   | 16                          | 4                             | 13.85                          | 4.11  |
|                   | 24   | 16                          | 8                             | 9.64                           | 7.13  |
|                   | 32   | 16                          | 16                            | 2.04                           | 0.49  |
|                   | 40   | 16                          | 24                            | 0.55                           | 0.38  |
|                   | 21   | 20                          | 1                             | 106.11                         | 42.93 |
|                   | 22   | 20                          | 2                             | 40.50                          | 18.64 |
|                   | 24   | 20                          | 4                             | 48.79                          | 16.07 |
|                   | 28   | 20                          | 8                             | 23.73                          | 11.00 |
|                   | 36   | 20                          | 16                            | 3.49                           | 2.11  |
|                   | 44   | 20                          | 24                            | 0.70                           | 0.22  |

Mice received clofazimine at 25 mg/kg daily for the indicated duration of administration. Week represents the time point in the overall experiment and corresponds to the X-axis in Figure 2. CFZ, clofazimine; SD, standard deviation of the mean.

**Table S4. Clofazimine concentration measurements in the liver from uninfected mice.**

| Sample             | Week | Weeks of CFZ administration | Weeks post-CFZ administration | Mean [CFZ] ( $\mu\text{g/g}$ ) | SD    |
|--------------------|------|-----------------------------|-------------------------------|--------------------------------|-------|
| Liver accumulation | 1    | 1                           | ---                           | 7.05                           | 1.85  |
|                    | 2    | 2                           | ---                           | 11.25                          | 0.29  |
|                    | 4    | 4                           | ---                           | 33.25                          | 6.19  |
|                    | 8    | 8                           | ---                           | 59.97                          | 26.55 |
|                    | 12   | 12                          | ---                           | 82.37                          | 8.41  |
|                    | 16   | 16                          | ---                           | 111.29                         | 77.30 |
|                    | 20   | 20                          | ---                           | 107.21                         | 12.65 |
| Liver elimination  | 5    | 4                           | 1                             | 9.91                           | 3.15  |
|                    | 6    | 4                           | 2                             | 6.96                           | 1.38  |
|                    | 8    | 4                           | 4                             | 1.60                           | 0.97  |
|                    | 12   | 4                           | 8                             | 0.04                           | 0.01  |
|                    | 20   | 4                           | 16                            | 0.18                           | 0.05  |
|                    | 28   | 4                           | 24                            | 0.10                           | 0.03  |
|                    | 9    | 8                           | 1                             | 8.17                           | 2.48  |
|                    | 10   | 8                           | 2                             | 3.49                           | 2.21  |
|                    | 12   | 8                           | 4                             | 4.72                           | 1.87  |
|                    | 16   | 8                           | 8                             | 0.33                           | 0.34  |
|                    | 24   | 8                           | 16                            | 0.18                           | 0.13  |
|                    | 32   | 8                           | 24                            | 0.33                           | 0.44  |
|                    | 13   | 12                          | 1                             | 15.03                          | 1.50  |
|                    | 14   | 12                          | 2                             | 27.37                          | 11.33 |
|                    | 16   | 12                          | 4                             | 4.00                           | 2.84  |
|                    | 20   | 12                          | 8                             | 10.70                          | 9.15  |
|                    | 28   | 12                          | 16                            | 1.10                           | 1.13  |
|                    | 36   | 12                          | 24                            | 0.41                           | 0.56  |
|                    | 17   | 16                          | 1                             | 34.79                          | 22.55 |
|                    | 18   | 16                          | 2                             | 68.31                          | 5.53  |
|                    | 20   | 16                          | 4                             | 41.90                          | 34.21 |
|                    | 24   | 16                          | 8                             | 8.18                           | 3.38  |
|                    | 32   | 16                          | 16                            | 16.61                          | 1.55  |
|                    | 40   | 16                          | 24                            | 0.77                           | 0.95  |
|                    | 21   | 20                          | 1                             | 82.49                          | 45.08 |
|                    | 22   | 20                          | 2                             | 68.91                          | 57.34 |
|                    | 24   | 20                          | 4                             | 156.91                         | 52.11 |
|                    | 28   | 20                          | 8                             | 62.50                          | 18.48 |
| 36                 | 20   | 16                          | 6.99                          | 5.20                           |       |
| 44                 | 20   | 24                          | 1.24                          | 0.43                           |       |

Mice received clofazimine at 25 mg/kg daily for the indicated duration of administration. Week represents the time point in the overall experiment and corresponds to the X-axis in Figure 2. CFZ, clofazimine; SD, standard deviation of the mean.

**Table S5. Clofazimine concentration measurements in serum from uninfected mice.**

| Sample             | Week | Weeks of CFZ administration | Weeks post-CFZ administration | Mean [CFZ] ( $\mu\text{g/mL}$ ) | SD   |
|--------------------|------|-----------------------------|-------------------------------|---------------------------------|------|
| Serum accumulation | 1    | 1                           | ---                           | 0.92                            | 0.30 |
|                    | 2    | 2                           | ---                           | 0.85                            | 0.03 |
|                    | 4    | 4                           | ---                           | 1.05                            | 0.04 |
|                    | 8    | 8                           | ---                           | 2.25                            | 0.03 |
|                    | 12   | 12                          | ---                           | 1.30                            | 0.29 |
|                    | 16   | 16                          | ---                           | 1.21                            | 0.21 |
|                    | 20   | 20                          | ---                           | 1.00                            | 0.12 |
| Serum elimination  | 5    | 4                           | 1                             | 1.33                            | 0.17 |
|                    | 6    | 4                           | 2                             | 0.72                            | 0.13 |
|                    | 8    | 4                           | 4                             | 0.31                            | 0.09 |
|                    | 12   | 4                           | 8                             | Below LLOQ                      | ---  |
|                    | 20   | 4                           | 16                            | Below LLOQ                      | ---  |
|                    | 28   | 4                           | 24                            | Below LLOQ                      | ---  |
|                    | 9    | 8                           | 1                             | 1.17                            | 0.35 |
|                    | 10   | 8                           | 2                             | 0.90                            | 0.11 |
|                    | 12   | 8                           | 4                             | 0.34                            | 0.07 |
|                    | 16   | 8                           | 8                             | 0.10                            | 0.06 |
|                    | 24   | 8                           | 16                            | Below LLOQ                      | ---  |
|                    | 32   | 8                           | 24                            | Below LLOQ                      | ---  |
|                    | 13   | 12                          | 1                             | 0.93                            | 0.09 |
|                    | 14   | 12                          | 2                             | 1.01                            | 0.03 |
|                    | 16   | 12                          | 4                             | 0.40                            | 0.10 |
|                    | 20   | 12                          | 8                             | 0.35                            | 0.05 |
|                    | 28   | 12                          | 16                            | 0.11                            | 0.04 |
|                    | 36   | 12                          | 24                            | 0.11                            | 0.00 |
|                    | 17   | 16                          | 1                             | 0.81                            | 0.07 |
|                    | 18   | 16                          | 2                             | 0.62                            | 0.05 |
|                    | 20   | 16                          | 4                             | 0.70                            | 0.11 |
|                    | 24   | 16                          | 8                             | 0.30                            | 0.07 |
|                    | 32   | 16                          | 16                            | 0.12                            | 0.07 |
|                    | 40   | 16                          | 24                            | 0.08                            | 0.02 |
|                    | 21   | 20                          | 1                             | 0.99                            | 0.18 |
|                    | 22   | 20                          | 2                             | 0.68                            | 0.10 |
|                    | 24   | 20                          | 4                             | 0.49                            | 0.15 |
|                    | 28   | 20                          | 8                             | 0.32                            | 0.02 |
|                    | 36   | 20                          | 16                            | 0.19                            | 0.07 |
|                    | 44   | 20                          | 24                            | 0.08                            | 0.01 |

Mice received clofazimine at 25 mg/kg daily for the indicated duration of administration. Week represents the time point in the overall experiment and corresponds to the X-axis in Figure 2. CFZ, clofazimine; SD, standard deviation of the mean; LLOQ, lower limit of quantitation.

**Table S6. Clofazimine concentration measurements in the spleen from uninfected mice.**

| Sample              | Week | Weeks of CFZ administration | Weeks post-CFZ administration | Mean [CFZ] ( $\mu\text{g/g}$ ) | SD      |
|---------------------|------|-----------------------------|-------------------------------|--------------------------------|---------|
| Spleen accumulation | 1    | 1                           | ---                           | 8.11                           | 3.12    |
|                     | 2    | 2                           | ---                           | 11.18                          | 0.52    |
|                     | 4    | 4                           | ---                           | 50.43                          | 1.92    |
|                     | 8    | 8                           | ---                           | 190.74                         | 96.40   |
|                     | 12   | 12                          | ---                           | 4684.68                        | 409.71  |
|                     | 16   | 16                          | ---                           | 3765.80                        | 712.26  |
|                     | 20   | 20                          | ---                           | 6773.65                        | 703.11  |
| Spleen elimination  | 5    | 4                           | 1                             | 20.70                          | 3.65    |
|                     | 6    | 4                           | 2                             | 13.17                          | 1.14    |
|                     | 8    | 4                           | 4                             | 5.94                           | 2.85    |
|                     | 12   | 4                           | 8                             | 0.44                           | 0.11    |
|                     | 20   | 4                           | 16                            | 1.73                           | 0.35    |
|                     | 28   | 4                           | 24                            | 0.51                           | 0.05    |
|                     | 9    | 8                           | 1                             | 376.99                         | 256.45  |
|                     | 10   | 8                           | 2                             | 301.84                         | 232.53  |
|                     | 12   | 8                           | 4                             | 1936.85                        | 2148.93 |
|                     | 16   | 8                           | 8                             | 228.73                         | 388.37  |
|                     | 24   | 8                           | 16                            | 11.48                          | 9.75    |
|                     | 32   | 8                           | 24                            | 96.96                          | 123.52  |
|                     | 13   | 12                          | 1                             | 2766.26                        | 1058.69 |
|                     | 14   | 12                          | 2                             | 3528.44                        | 1089.41 |
|                     | 16   | 12                          | 4                             | 1078.41                        | 1229.96 |
|                     | 20   | 12                          | 8                             | 3334.04                        | 2148.05 |
|                     | 28   | 12                          | 16                            | 642.93                         | 366.79  |
|                     | 36   | 12                          | 24                            | 424.27                         | 496.57  |
|                     | 17   | 16                          | 1                             | 4041.94                        | 1482.08 |
|                     | 18   | 16                          | 2                             | 5114.89                        | 351.28  |
|                     | 20   | 16                          | 4                             | 7297.53                        | 2011.76 |
|                     | 24   | 16                          | 8                             | 2001.10                        | 603.34  |
|                     | 32   | 16                          | 16                            | 1341.08                        | 610.37  |
|                     | 40   | 16                          | 24                            | 1981.06                        | 1700.00 |
|                     | 21   | 20                          | 1                             | 6101.90                        | 858.70  |
|                     | 22   | 20                          | 2                             | 4534.30                        | 944.05  |
|                     | 24   | 20                          | 4                             | 3623.01                        | 192.22  |
|                     | 28   | 20                          | 8                             | 9020.41                        | 376.53  |
|                     | 36   | 20                          | 16                            | 4055.40                        | 1948.26 |
|                     | 44   | 20                          | 24                            | 1308.75                        | 250.84  |

Mice received clofazimine at 25 mg/kg daily for the indicated duration of administration. Week represents the time point in the overall experiment and corresponds to the X-axis in Figure 3. CFZ, clofazimine; SD, standard deviation of the mean.

**Table S7. Mean colony forming unit (CFU) counts from mouse lungs and spleens in the dose-ranging experiment.**

| Treatment group | Organ  | Mean (SD) log <sub>10</sub> CFU/organ at the following time points: |                |                |                |                |                |                |                |                |
|-----------------|--------|---------------------------------------------------------------------|----------------|----------------|----------------|----------------|----------------|----------------|----------------|----------------|
|                 |        | Day -41                                                             | Day 0          | Day 1          | Day 2          | Day 7          | Day 14         | Day 28         | Day 56         | Day 84         |
| Untreated       | Lungs  | 2.17<br>(0.28)                                                      | 6.49<br>(0.30) | 6.76<br>(0.22) | 6.51<br>(0.32) | 6.47<br>(0.29) | 6.48<br>(0.42) | 6.02<br>(0.29) | 6.21<br>(0.49) | 6.16<br>(0.32) |
|                 | Spleen |                                                                     | 4.66<br>(0.21) | 4.61<br>(0.29) | 4.79<br>(0.40) | 4.64<br>(0.47) | 4.47<br>(0.42) | 4.22<br>(0.50) | 4.61<br>(0.40) | 4.32<br>(0.09) |
| Clofazimine A   | Lungs  |                                                                     |                | 6.44<br>(0.54) | 6.59<br>(0.37) | 6.21<br>(0.41) | 5.66<br>(0.37) | 4.65<br>(0.77) | 3.91<br>(0.89) | 2.66<br>(1.52) |
|                 | Spleen |                                                                     |                | 4.30<br>(0.34) | 4.46<br>(0.14) | 4.05<br>(0.44) | 3.39<br>(0.27) | 1.98<br>(2.08) | 2.20<br>(0.72) | 0.52<br>(0.73) |
| Clofazimine B   | Lungs  |                                                                     |                | 6.61<br>(0.35) | 6.42<br>(0.15) | 6.01<br>(0.18) | 5.53<br>(0.14) | 4.91<br>(0.76) | 2.41<br>(1.23) | 3.22<br>(0.58) |
|                 | Spleen |                                                                     |                | 4.88<br>(0.28) | 4.63<br>(0.18) | 3.88<br>(0.19) | 3.32<br>(0.44) | 2.70<br>(0.35) | 2.41<br>(0.88) | 2.12<br>(0.32) |
| Clofazimine C   | Lungs  |                                                                     |                | 6.38<br>(0.17) | 6.15<br>(0.32) | 6.43<br>(0.44) | 5.50<br>(0.30) | 4.61<br>(0.27) | 4.43<br>(0.80) | 3.07<br>(0.67) |
|                 | Spleen |                                                                     |                | 4.45<br>(0.23) | 4.26<br>(0.14) | 4.36<br>(0.50) | 3.43<br>(0.37) | 2.79<br>(0.69) | 3.01<br>(0.24) | 2.07<br>(0.57) |
| Clofazimine D   | Lungs  |                                                                     |                | 6.50<br>(0.30) | 6.43<br>(0.36) | 5.87<br>(0.23) | 5.34<br>(0.50) | 4.91<br>(0.54) | 3.32<br>(0.83) | 3.79<br>(0.71) |
|                 | Spleen |                                                                     |                | 4.46<br>(0.20) | 4.31<br>(0.43) | 3.82<br>(0.33) | 2.97<br>(0.46) | 3.19<br>(0.32) | 2.15<br>(0.40) | 1.35<br>(0.58) |
| Clofazimine E   | Lungs  |                                                                     |                | 6.15<br>(0.06) | 6.45<br>(0.39) | 6.16<br>(0.41) | 5.78<br>(0.47) | 4.50<br>(0.29) | 4.25<br>(0.33) | 3.34<br>(0.75) |
|                 | Spleen |                                                                     |                | 4.34<br>(0.18) | 4.49<br>(0.22) | 4.03<br>(0.19) | 3.00<br>(0.69) | 2.28<br>(0.78) | 2.06<br>(0.61) | 1.23<br>(0.82) |
| Clofazimine F   | Lungs  |                                                                     |                | 6.64<br>(0.30) | 6.44<br>(0.14) | 6.23<br>(0.29) | 5.41<br>(0.59) | 4.54<br>(0.40) | 3.98<br>(0.58) | 3.31<br>(0.58) |
|                 | Spleen |                                                                     |                | 4.45<br>(0.18) | 4.66<br>(0.39) | 3.92<br>(0.18) | 3.26<br>(0.67) | 2.65<br>(0.33) | 2.23<br>(0.37) | 0.74<br>(0.75) |

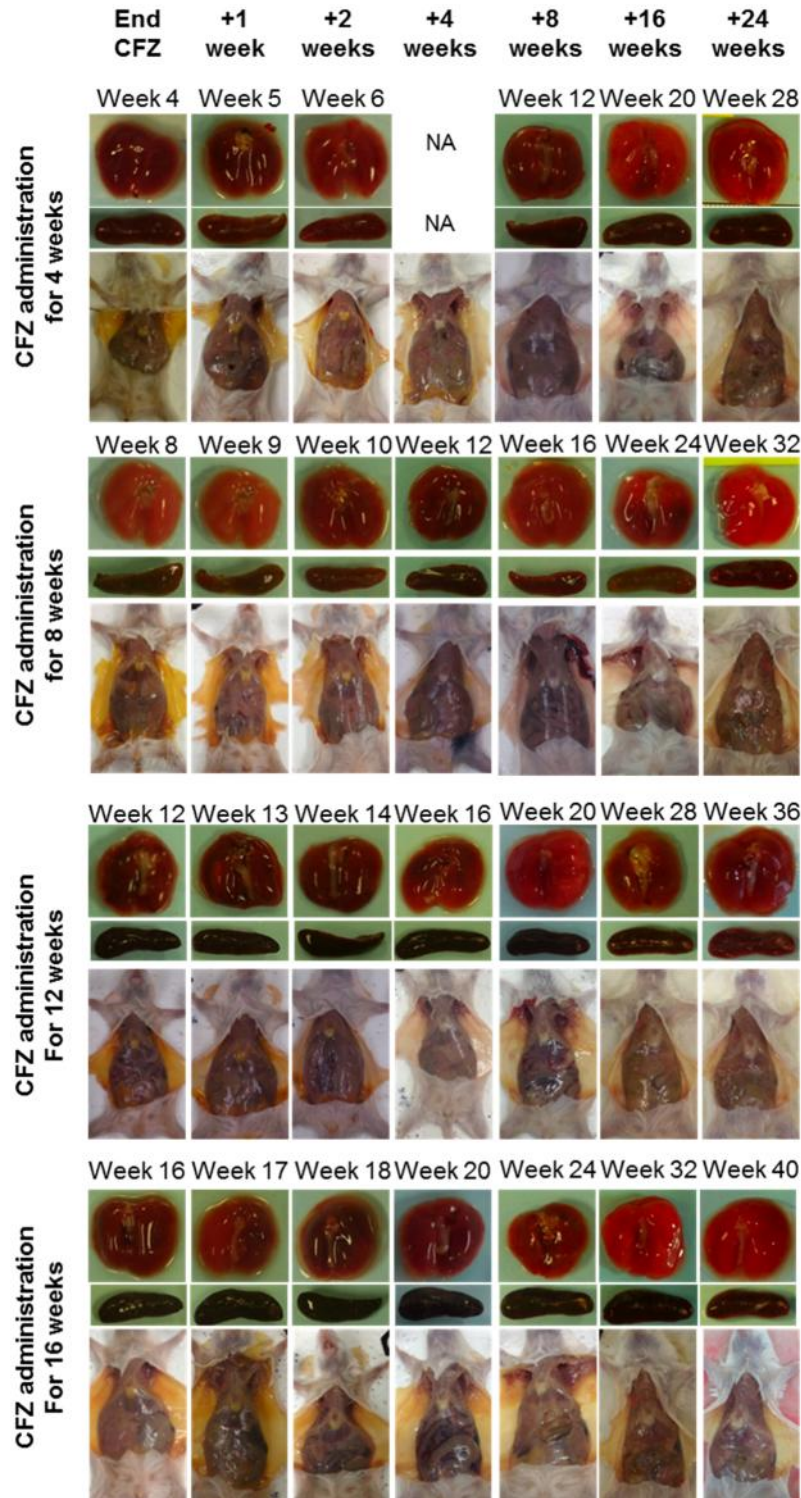

**Figure S1.** Clofazimine-induced discoloration in the lungs, spleen and subcutaneous adipose tissue in uninfected BALB/c mice. These photographs represent the 24 weeks following the discontinuation of clofazimine administration that was of 4, 8, 12 or 16 weeks' duration. CFZ, clofazimine; NA, not available.

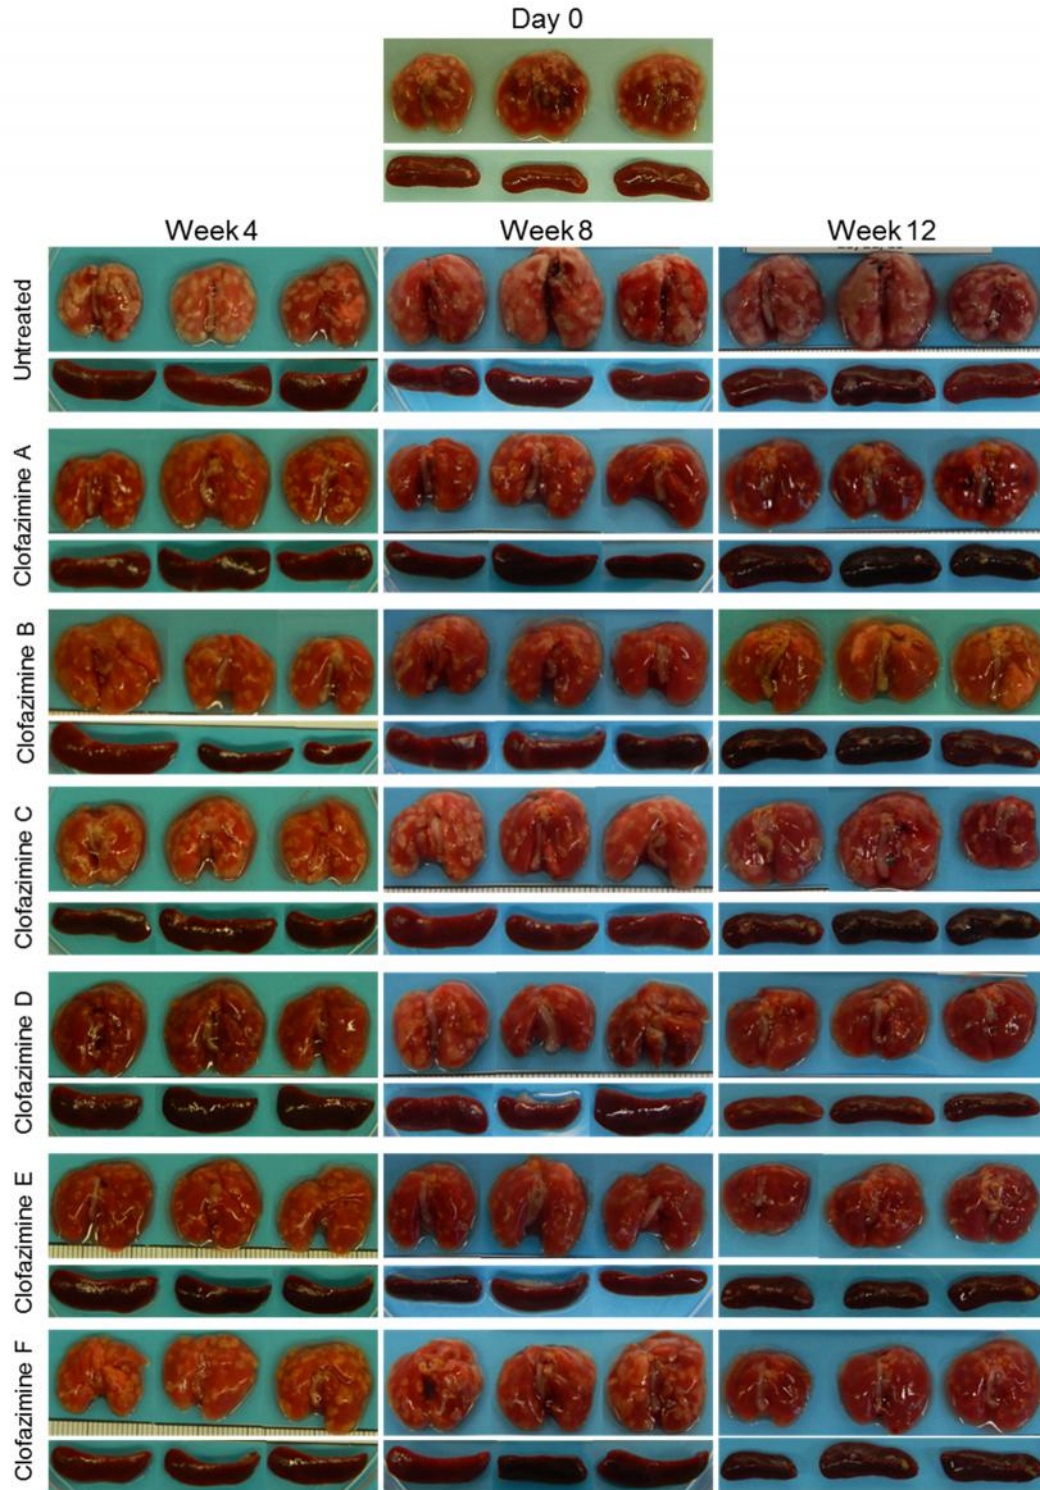

**Figure S2.** Gross pathology of lungs and spleens from *M. tuberculosis*-infected mice before (Day 0) and during treatment with a clofazimine-containing regimen. Treatment was initiated 24 days after infection. Drug regimens are described in Table 1.
